# Supplementary material for: Alpha-Synuclein co-pathology in Alzheimer’s Disease drives tau accumulation
Source: Research Square preprint supplement (doi:10.21203/rs.3.rs-6494882/v1), 2025-05-21
Supplement: Supplementary file 1 [file 43b971e0a78f7bfc50f64178.xlsx]

## Sheet: STable_1
sample	age	sex	Braak_tau	APOE_WGS	Braak_LBP	AD_PRS	DLB_PRS	PD_PRS	MAPT_haplotype	GBA1_mutation	rs356182	rs356168
Sample_53	83.08	m	6	E3/E4	0	1.3865554438881706	1.5293670034276947	0.4447979086128304	H1	NA	protective	protective
Sample_85	87.5833	f	5	E3/E4	6	2.01034	0.5270867353349138	1.267418378949481	H1	NA	risk	HET
Sample_54	89.92	m	6	E4/E4	0	2.4962697111319514	2.8937180589765594	-1.31354	HET	NA	HET	HET
Sample_55	80.17	m	5	E4/E4	0	0.6413580664402966	1.5378354612413814	-0.763523	H1	NA	protective	HET
Sample_56	73.17	m	5	E3/E3	0	-0.184863	-0.929136	0.894067	H1	NA	HET	HET
Sample_6	68.33	NA	5	E4/E4	6	0.7097589044046084	2.086764768316646	0.873918	H1	NA	HET	HET
Sample_7	76.58	NA	6	E3/E3	0	0.4488341775043875	0.014678118455916168	-0.397452	H1	NA	protective	protective
Sample_59	93.83	f	6	E3/E4	0	1.6302873415848507	0.7679430262075766	0.13046537111693027	H1	NA	protective	HET
Sample_79	95.75	f	4	E3/E3	0	-0.91249	-0.452335	0.10901588034488269	HET	NA	HET	HET
Sample_22	83.92	m	6	E3/E4	0	0.4694719878870398	1.0371658008051312	-0.0914394	H1	NA	protective	protective
Sample_87	85.5	f	6	E3/E4	6	0.796484	1.8099751146702376	-2.00148	HET	NA	protective	protective
Sample_70	89.58	m	5	E3/E3	0	0.7516230144373992	-0.201358	-1.13466	HET	NA	HET	HET
Sample_88	68.92	f	6	E3/E4	0	0.41087967467454356	0.7927080604947201	-0.793553	HET	NA	HET	risk
Sample_71	78.75	f	5	E3/E4	0	1.1125287074682604	1.54562	-1.5179	HET	NA	protective	risk
Sample_72	97.33	f	5	E3/E3	0	-0.280471	-0.906705	-1.87799	H2	NA	protective	protective
Sample_23	85	f	4	E2/E4	0	NA	NA	NA	HET	NA	HET	HET
Sample_64	NA	f	5	E4/E4	0	1.8626942229558092	1.8020788809266417	-0.661216	H1	NA	HET	HET
Sample_42	73.58	f	5	E3/E4	0	0.0719469	-1.13335	0.022697929601592153	H1	NA	HET	HET
Sample_89	93.67	m	4	E2/E3	0	-1.06502	-0.201358	-0.0347607	HET	NA	HET	HET
Sample_90	83.92	m	5	E3/E3	6	-0.265504	-0.906705	1.2005999652716908	H1	T408M	HET	risk
Sample_91	75	m	6	E3/E4	6	0.8522768967998099	1.268908546614302	0.6175638070131777	H1	NA	risk	risk
Sample_82	86.42	f	4	E4/E4	0	1.6384727301762954	1.8020788809266417	0.7155814799957717	H1	T408M	protective	protective
Sample_9	77.5	NA	5	E3/E4	6	0.4067671928090675	1.8099751146702376	-1.42755	HET	NA	protective	protective
Sample_65	76.25	f	5	E4/E4	0	2.8105432535501036	4.360318995475885	1.1042722521681096	H1	E365K	HET	HET
Sample_92	56.83	m	6	E3/E4	6	1.4307575420749676	1.268908546614302	0.3557500226803664	H1	NA	HET	HET
Sample_112	88.33	f	6	E3/E3	0	0.6393761156817225	-0.437796	0.030237750600249014	HET	NA	protective	HET
Sample_66	78.92	f	6	E3/E4	0	0.8035199083458827	1.0371658008051312	0.7747300757611241	H1	NA	protective	HET
Sample_74	57.08	m	6	E3/E4	0	0.5464002269642255	0.9962716449756581	-1.21591	HET	NA	protective	protective
Sample_93	70.5	f	6	E4/E4	6	1.5939511148105263	1.54562	0.804629	H1	NA	protective	protective
Sample_24	NA	f	6	E3/E3	6	-1.54927	-0.699614	-0.980098	H1	L483P	protective	HET
Sample_31	NA	m	4	E4/E4	0	0.42880665743098567	3.501980740188575	1.2499987925042961	H1	E365K	protective	protective
Sample_10	78.25	f	5	E4/E4	0	2.025411783136168	3.1770446012944347	-0.115489	H1	NA	protective	protective
Sample_62	87.92	m	5	E3/E3	0	0.3441408537094174	-1.3706	-0.426831	HET	NA	HET	HET
Sample_76	83.58	m	5	E3/E4	0	2.1952559233509645	1.0464643203114778	2.516688720279316	H1	NA	HET	HET
Sample_32	88.58	f	6	E4/E4	6	1.182717508577489	0.7523609543520299	-0.00798134	H1	NA	protective	protective
Sample_77	78	f	6	E4/E4	0	2.0307315150468366	1.2783249845505997	0.0563671	H1	NA	protective	HET
Sample_34	76.58	m	4	E3/E3	0	-0.969004	-0.89256	1.4420042341426094	HET	T408M	protective	HET
Sample_5	NA	NA	5	E3/E3	0	0.25990371123577966	-0.224758	-0.0169511	H1	NA	protective	protective
Sample_1	88.83	NA	5	E3/E4	0	-0.708483	-0.685289	-1.37581	HET	NA	protective	protective
Sample_2	80.25	NA	5	E4/E4	0	1.6935298031195742	1.0213507350604898	0.5718048933661316	H1	NA	HET	HET
Sample_33	80.75	f	5	E3/E3	0	-0.0666596	-0.685289	-1.04315	HET	NA	HET	HET
Sample_80	81.08	m	5	E3/E4	0	0.16713028060039556	0.5270867353349138	-0.665506	HET	NA	protective	HET
Sample_121	76.83	m	5	E3/E3	6	0.30369714403460674	NA	-0.865961	H1	NA	protective	protective
Sample_3	70	NA	6	E4/E4	0	-0.138973	1.5293670034276947	-1.51686	H1	NA	protective	protective
Sample_4	85.5	f	5	E2/E3	6	0.9711656148459914	-0.437796	0.5640050785399321	H1	NA	protective	protective
Sample_35	75.08	f	6	E3/E3	0	0.38059608362254294	0.014678118455916168	-0.424491	H1	NA	HET	HET
Sample_29	79.25	f	5	E3/E4	0	-0.537504	2.3415803976388387	0.6768423996923036	H1	E365K	protective	HET
Sample_25	85.08	f	6	E3/E4	0	0.0988053	1.268908546614302	0.7051817268941667	HET	NA	protective	protective
Sample_39	NA	m	5	E3/E4	6	1.819514968550114	2.9140091624822584	1.6476593517267688	H1	E365K	protective	HET
Sample_102	68.33	m	5	E3/E3	0	0.35440678375785845	-0.452335	-0.378343	HET	NA	HET	HET
Sample_26	74.83	m	6	E3/E4	0	1.1259369035936149	0.7679430262075766	-2.24432	H2	NA	protective	protective
Sample_103	64.92	m	6	E3/E4	6	0.47503250327808233	-0.699614	0.9465859957650812	H1	NA	HET	HET
Sample_69	73.75	f	6	E3/E3	0	-1.68147	-0.929136	-1.67116	HET	NA	protective	protective
Sample_104	73.75	f	6	E4/E4	0	1.264813427713551	2.624424830300278	-0.783023	HET	NA	protective	protective
Sample_30	NA	f	6	E3/E4	0	1.329079149609792	0.5270867353349138	0.13111535568578464	HET	NA	HET	HET
Sample_37	96.42	f	6	E2/E3	0	0.6334999711955881	0.0384071	-0.0285209	HET	NA	HET	HET
Sample_44	74.92	m	6	E3/E3	0	0.9312263840548005	1.0304594494115416	1.9411923830194655	H1	E365K	HET	HET
Sample_28	NA	m	6	E3/E4	0	0.3161345689308431	1.54562	-1.34461	HET	NA	protective	HET
Sample_83	66.42	f	6	E3/E3	0	0.163314	-0.224758	-1.29118	HET	NA	protective	HET
Sample_40	NA	m	6	E3/E4	0	1.0802073438819588	0.2805389069720576	-0.551888	HET	NA	risk	risk
Sample_95	NA	m	6	E3/E4	0	2.467590510121608	1.7934912353460806	-0.286305	HET	NA	protective	protective
Sample_45	72.17	m	6	E3/E3	6	1.1919564290406706	-0.662523	2.0901688461998997	H1	NA	risk	risk
Sample_27	69.17	f	6	E3/E3	0	0.0404786	-1.14729	-0.719974	HET	NA	HET	HET
Sample_52	NA	f	4	E3/E4	0	0.31534237183999597	NA	-0.444121	H1	NA	protective	protective
Sample_46	67.17	f	5	E3/E4	6	0.3909079763768684	-0.452335	0.5458055106121313	H1	NA	HET	HET
Sample_47	92.83	f	5	E3/E4	0	-0.135171	0.014678118455916168	-1.20746	H1	NA	HET	HET
Sample_38	63.67	m	6	E3/E3	0	0.8337654517199006	-0.452335	0.2808718003488413	H1	NA	protective	HET
Sample_109	75.67	f	6	E3/E4	0	1.8121112236789818	1.2943626365571734	-0.509509	H1	NA	protective	protective
Sample_110	66.58	f	6	E3/E4	0	1.2478529115219292	0.7523609543520299	0.00501835	H1	NA	HET	HET
Sample_48	62.33	m	4	E3/E4	6	-0.553606	0.7523609543520299	0.2882816244337319	H1	NA	HET	HET
Sample_49	67	f	6	E3/E3	0	-1.5736	-0.466861	0.3930591369323659	HET	NA	HET	HET
Sample_81	81.25	f	6	E3/E4	0	1.26239	0.7927080604947201	-1.18302	H2	NA	HET	HET
Sample_17	78.67	f	6	E3/E3	0	-0.169561	-0.699614	-1.30197	HET	NA	HET	HET
Sample_18	91.83	f	4	E3/E3	0	-0.354531	-0.685289	-0.219876	H1	NA	HET	HET
Sample_19	75.67	f	5	E4/E4	0	1.4231861930165162	2.060222261768887	-0.674346	HET	NA	protective	protective
Sample_21	NA	m	5	E3/E3	0	0.20953386227173934	-0.000252054	1.9155829910067708	H1	NA	HET	HET
Sample_14	83.58	f	6	E3/E3	0	0.45032553539320475	0.25748413758032135	0.3066111892753045	H1	NA	protective	HET
Sample_20	57.58	f	6	E3/E4	0	2.4864611863801365	0.7927080604947201	0.9676454957958297	H1	R434H	HET	HET
Sample_15	83.25	NA	5	E4/E4	0	-0.503513	1.0213507350604898	-0.587768	HET	NA	HET	HET
Sample_16	74.5	NA	6	E2/E3	0	-1.02123	-1.13335	0.4843169703989116	H1	NA	risk	risk
Sample_84	84.67	m	6	E3/E3	0	-0.967015	-0.224758	-2.48299	H2	NA	protective	HET
Sample_11	73.5	NA	5	E3/E4	0	1.4851097609545925	0.5026865494616393	-0.338693	H1	NA	HET	HET
Sample_13	NA	NA	5	E4/E4	0	0.605487	1.268908546614302	-0.0887094	H1	NA	HET	HET
Sample_12	87.83	NA	5	E2/E3	0	-0.850531	-0.239481	0.5614051402645359	H1	NA	risk	risk
Sample_111	79.42	f	6	E2/E3	0	-1.10967	-0.929136	-1.25894	HET	NA	protective	protective
Sample_107	82.08	m	4	E3/E4	6	-0.0364202	0.2805389069720576	-0.0989792	H2	NA	HET	risk
Sample_97	76.25	f	6	E4/E4	0	2.3348875689047364	1.8185701987078895	0.34756021711286067	H1	NA	protective	protective
Sample_98	72.58	m	6	E3/E3	0	-0.142452	0.029621223312789078	0.041677479012013546	H1	NA	protective	HET
Sample_99	82.17	f	5	E3/E4	0	1.1102858385092127	1.54562	0.23875280028735651	HET	NA	protective	HET
Sample_101	70.33	m	6	E3/E3	0	1.0216734907878229	-0.685289	0.23914279102866634	H1	NA	protective	HET
Sample_155	76.17	m	4	E3/E4	6	-0.418895	0.7927080604947201	1.1844803479642094	H1	N409S	HET	risk
Sample_113	78.92	m	5	E3/E3	0	-1.22757	-0.676867	-0.206747	HET	NA	protective	protective
Sample_114	69.25	f	6	E3/E3	6	-0.0688532	-0.224758	1.0625432428479367	HET	NA	protective	protective
Sample_115	NA	m	5	E3/E3	0	0.25651094146878956	0.014678118455916168	0.1173356828261648	H1	NA	protective	protective
Sample_116	NA	f	6	E3/E4	0	-0.247851	0.5026865494616393	-1.51491	H2	NA	HET	HET
Sample_117	70.5	m	6	E3/E4	0	1.8151698959524436	1.268908546614302	1.1679707399154204	H1	NA	HET	HET
Sample_122	82.75	f	6	E3/E4	0	0.9436599208671559	0.5270867353349138	-0.164628	H2	NA	risk	risk
Sample_123	78.08	m	4	E3/E4	0	0.8868543210583284	1.0371658008051312	0.7463907485592656	H1	NA	HET	HET
Sample_124	81.33	m	6	E3/E4	0	1.9374111143254151	0.5270867353349138	0.3358604948735572	H1	NA	risk	risk
Sample_125	85.17	f	6	E3/E3	0	-0.806408	0.5190741786886245	-1.26037	HET	NA	HET	HET
Sample_126	71.08	f	4	E3/E3	6	0.9091599805659886	-0.201358	-0.248086	H1	NA	protective	HET
Sample_127	63.25	m	4	E3/E3	0	0.12912842646328057	-0.676867	0.15776472300864028	H1	NA	HET	HET
Sample_128	87	f	6	E3/E3	0	0.23634136747357612	0.014678118455916168	0.7216913349429601	H1	NA	protective	protective
Sample_129	64	m	4	E3/E3	6	0.23608378191642962	-0.929136	-0.608957	H1	NA	protective	protective
Sample_131	81.17	m	6	E3/E3	0	-1.00292	-0.89256	-0.931739	HET	NA	HET	HET
Sample_136	75.42	m	4	E3/E4	0	0.8746553190201086	0.7679430262075766	0.283732	H1	NA	HET	risk
Sample_137	96.17	f	4	E3/E4	0	0.286579	0.2653786500297232	-0.259525	H1	NA	HET	risk
Sample_139	62.33	m	4	E2/E4	0	NA	NA	NA	H2	NA	HET	HET
Sample_140	68.25	f	4	E4/E4	0	2.434834236581137	2.348768087092934	1.0097644958573126	HET	NA	HET	HET
Sample_142	74.17	m	4	E3/E4	6	0.4203811796598617	0.5026865494616393	0.43387816785615124	H1	NA	protective	HET
Sample_144	63.08	f	4	E4/E4	0	0.7837581665778068	2.060222261768887	-0.880651	H1	NA	protective	protective
Sample_145	87.58	f	6	E3/E3	6	-0.455306	-1.13335	0.033747667272044986	H1	NA	risk	risk
Sample_146	90.08	f	4	E3/E3	0	0.4043122844183411	NA	-1.49099	HET	NA	HET	protective
Sample_147	73.33	m	6	E3/E4	6	0.3670987392881923	0.5270867353349138	0.22861304101329516	HET	NA	risk	risk
Sample_148	61.33	m	4	E4/E4	6	1.6319533855280568	2.8762962742922435	2.5143487758314578	H1	NA	HET	HET
Sample_149	75.33	m	6	E3/E4	6	0.7932368985003908	-0.685289	0.6305634983901816	H1	NA	HET	HET
Sample_150	79.08	m	4	E3/E3	6	-0.527939	-1.14729	0.062217	HET	NA	protective	protective
Sample_151	77.92	m	4	E3/E4	6	0.15819310321844363	-0.201358	0.38837924803664414	H1	NA	HET	HET
Sample_152	79.17	f	4	E2/E3	6	-0.307525	-0.452335	2.0843189850802513	H1	NA	risk	risk
Sample_153	79.17	f	4	E4/E4	0	0.6725350836242012	0.2653786500297232	-0.141748	H1	NA	HET	HET
Sample_154	73.67	f	4	E3/E3	6	0.4327341775918151	-0.437796	-0.120169	H1	NA	protective	HET
Sample_157	81.67	m	4	E3/E3	0	-0.309023	NA	0.10381600379408298	H1	NA	HET	protective
Sample_158	77.83	m	5	E3/E4	6	2.7962809287120756	1.2783249845505997	1.7669965185676468	H1	NA	HET	HET
Sample_159	74.42	f	4	E3/E4	6	0.6320452723833676	2.6070386559023864	1.1118120731667716	H1	E365K	protective	protective
Sample_160	64.92	f	4	E3/E3	0	0.5035581249751085	-0.685289	0.49614668955198876	H1	NA	protective	HET
Sample_161	71.58	f	5	E3/E3	6	1.297418204842784	0.5190741786886245	-1.27051	HET	NA	protective	protective
Sample_177	NA	f	5	E3/E3	0	1.1491265467437524	-0.906705	0.9277364432684312	HET	NA	risk	risk
Sample_172	NA	f	4	E3/E4	0	-0.280199	0.7523609543520299	-0.662126	HET	NA	protective	protective
Sample_163	75.92	m	5	E4/E4	0	1.7602915360075728	3.1770446012944347	0.0445374	H1	NA	protective	HET
Sample_164	69.08	f	5	E3/E4	0	0.47628710463054674	-0.224758	-0.643666	HET	NA	protective	HET
Sample_165	67	m	5	E3/E4	0	-0.36719	0.5270867353349138	0.37147964924654187	H1	NA	HET	HET
Sample_167	79.58	f	4	E3/E4	6	0.1997172836318843	-0.201358	1.266768394380629	H1	NA	HET	risk
Sample_138	88.33333333333333	f	4	E3/E4	0	-1.13373	-0.929136	0.26800210588561013	HET	NA	HET	HET
Sample_141	81.75	f	5	E3/E3	0	0.4911057031839005	-0.452335	-1.21032	HET	NA	protective	protective
Sample_43	56.92	f	6	E3/E4	0	-0.200307	-0.452335	1.6459693918477605	H1	NA	HET	HET
