# Supplementary material for: Alpha-Synuclein co-pathology in Alzheimer’s Disease drives tau accumulation
Source: Research Square preprint supplement (doi:10.21203/rs.3.rs-6494882/v1), 2025-05-21
Supplement: Supplementary file 2 [file 83fa48e730c6b3d9c1f59ec2.xlsx]

## Sheet: STable_2
multiome_id	age	Braak_tau	APOE_WGS	PMI	sex	Braak_LBP	group
sample_01	93.83	6	E3/E4	NA	f	0	AD
sample_02	83.92	6	E3/E4	38	m	0	AD
sample_03	85.5	6	E3/E4	15	f	6	ASYN
sample_04	75	6	E3/E4	22	m	6	ASYN
sample_05	85.08	6	E3/E4	24	m	0	AD
sample_06	88.83	6	E3/E4	54	f	0	AD
sample_07	82.75	6	E3/E4	30	f	6	ASYN
sample_08	73.33	6	E3/E4	29	m	6	ASYN
