# Supplementary material for: Alpha-Synuclein co-pathology in Alzheimer’s Disease drives tau accumulation
Source: Research Square preprint supplement (doi:10.21203/rs.3.rs-6494882/v1), 2025-05-21
Supplement: Supplementary file 3 [file 98aa9e32cd3461ad64170506.xlsx]

## Sheet: STable_3
cluster	gene	logFC	logCPM	F	PValue	FDR
Ex-5	SLC44A5	2.49662	6.2527	87.6626	7.53432e-09	5.1806e-05
Ex-5	KCTD8	1.96273	9.76742	73.8361	3.48318e-08	0.000119752
Ex-5	GRM3	1.47075	9.66827	65.7158	8.77811e-08	0.000201194
Ex-5	SNX31	3.19908	4.93203	52.8777	2.86208e-07	0.000491991
Ex-5	KCNH7	1.29612	10.6131	50.3519	6.62852e-07	0.000849741
Ex-5	TMEM108	1.34025	9.00891	49.214	7.83879e-07	0.000849741
Ex-5	RORA	1.13663	9.85102	48.0169	9.37209e-07	0.000849741
Ex-5	DPH6-DT	1.95545	6.64064	47.6432	9.88646e-07	0.000849741
Ex-5	LRRC4C	1.24135	10.5447	46.249	1.22801e-06	0.000869488
Ex-5	AC110023.1	-2.25171	6.3484	45.7182	1.31557e-06	0.000869488
Ex-5	SGCZ	1.79014	9.67311	48.0318	1.47475e-06	0.000869488
Ex-5	SHISA9	1.13271	9.36882	44.899	1.51743e-06	0.000869488
Ex-5	HIVEP3	1.0992	9.17657	41.8707	2.48e-06	0.00131173
Ex-5	AC103855.2	2.14256	4.88692	39.718	2.74103e-06	0.00134624
Ex-5	RBFOX3	1.12856	8.93503	39.8161	3.51083e-06	0.00160936
Ex-5	IQCJ-SCHIP1	1.50522	9.18712	38.3515	4.53166e-06	0.00194748
Inh-4	SST	-1.96013	6.99438	63.6243	3.45676e-07	0.00200388
Ex-5	SNTG1	1.09215	10.9322	34.618	8.95841e-06	0.00362341
Ex-5	AC134878.2	1.71655	5.41219	33.7132	9.81186e-06	0.00374813
Ex-7	STAT1	-2.20913	6.50766	37.2465	1.85657e-06	0.00488116
Ex-7	ACTB	-1.73217	7.49006	37.0786	2.08228e-06	0.00488116
Ex-7	RPL15	-2.40999	5.7475	35.8011	2.08567e-06	0.00488116
Ex-5	CSMD1	0.756369	13.2468	31.9655	1.49828e-05	0.00542219
Ex-7	AC053513.1	-2.47149	5.39842	33.5858	3.18636e-06	0.00559286
Ex-5	AL356534.1	1.16359	8.095	31.3256	1.70502e-05	0.00586187
Inh-7	ARL17B	2.76471	7.76931	36.5973	1.54164e-06	0.00589061
Ex-5	MYT1L	0.839948	10.0763	30.9082	1.85339e-05	0.00606852
Ex-5	HTR1E	1.24883	8.24635	29.7152	2.37107e-05	0.00725717
Ex-5	NEGR1	0.77884	12.0997	29.5983	2.4275e-05	0.00725717
Inh-6	SLC8A1	1.50448	8.67135	48.994	2.77446e-06	0.00848596
Inh-6	NXPH1	1.47752	9.64042	46.7545	3.69759e-06	0.00848596
Ex-5	ENC1	-1.20854	7.1995	28.2262	3.25909e-05	0.00933729
Ex-5	AC007319.1	-2.66946	4.9934	26.254	3.57677e-05	0.0097794
Ex-5	KCNQ5	0.78116	11.5044	27.6253	3.69785e-05	0.0097794
Ex-5	AC093865.1	1.64982	6.76984	27.2223	4.05762e-05	0.0103334
Ex-5	HMGB1	1.08676	7.59517	26.9458	4.30178e-05	0.0105639
Ex-7	ITGA11	2.21745	5.30841	29.4937	9.33498e-06	0.0119002
Ex-7	AC120193.1	1.79281	7.44244	29.4513	1.11639e-05	0.0119002
Ex-7	EPHA6	2.21539	5.85876	28.3417	1.231e-05	0.0119002
Ex-7	SNTG1	1.16566	10.9152	28.603	1.39939e-05	0.0119002
Ex-7	LRRC37A2	2.41165	5.13705	27.6931	1.52545e-05	0.0119002
Ex-7	PGAM1	-2.34697	4.87962	26.4819	1.75524e-05	0.0120582
Ex-7	PEBP1	-1.55539	7.03261	27.2899	1.93899e-05	0.0120582
Ex-7	AP001977.1	2.37488	5.19776	26.4727	2.06094e-05	0.0120582
Ex-1	AC010997.3	-2.7058	4.20255	84.3537	8.62112e-07	0.0121935
Ex-1	TDO2	-2.28484	4.2346	75.4158	1.55688e-06	0.0121935
Ex-7	EEF1A1	-2.51559	5.75533	25.4857	2.57025e-05	0.0129353
Ex-7	CACNA1C	1.1036	10.3278	26.1547	2.57932e-05	0.0129353
Ex-7	DSCAML1	1.31093	9.0852	25.6869	2.91398e-05	0.0132011
Ex-7	RAD9A	1.60203	7.09331	25.4527	3.00838e-05	0.0132011
Ex-6	MGAT4C	-1.90508	7.80349	49.9975	2.0099e-06	0.0133487
Ex-6	RORA	1.48099	9.94179	40.166	7.84804e-06	0.0133487
Ex-6	TAFA2	1.05832	11.4134	40.071	7.96015e-06	0.0133487
Ex-6	CNTNAP2	0.919022	12.3926	39.5332	8.63627e-06	0.0133487
Ex-6	SORCS3	-1.46174	7.40323	38.7165	9.80369e-06	0.0133487
Ex-7	MSTRG.1784	1.33758	9.37416	25.0299	3.45481e-05	0.0142684
Ex-5	SDK1	0.861194	10.0031	25.4066	6.07042e-05	0.0143932
Ex-7	LRFN2	1.29233	8.13678	24.461	4.02153e-05	0.0146189
Ex-7	LRRC37A3	1.57292	7.18924	24.1893	4.22305e-05	0.0146189
Ex-7	AC105052.1	2.40554	5.82167	24.2292	4.37149e-05	0.0146189
Ex-7	TENM4	1.05776	10.3225	24.1352	4.37255e-05	0.0146189
Ex-5	TMSB4X	-1.18276	7.05491	25.1859	6.41174e-05	0.0146957
Inh-4	TERF2IP	-1.57138	7.6122	40.0127	7.33844e-06	0.0148657
Inh-4	NKAIN2	0.959719	11.1501	39.6331	7.69315e-06	0.0148657
Ex-7	SH3GL1	1.95497	6.14477	23.374	4.78263e-05	0.0149188
Ex-7	MSTRG.2070	1.40778	6.82735	23.1415	5.54741e-05	0.0149188
Ex-7	SEMA6D	1.16538	9.92731	23.0936	5.79367e-05	0.0149188
Ex-7	SYT4	-1.46665	6.37464	22.9355	5.92553e-05	0.0149188
Ex-7	STT3B	-1.44036	8.22082	22.8519	6.20502e-05	0.0149188
Ex-7	RCN2	-1.68586	5.73993	22.4545	6.30335e-05	0.0149188
Ex-7	IQCJ-SCHIP1	1.02551	12.0545	22.7396	6.38203e-05	0.0149188
Ex-7	PSAP	-1.47937	6.80237	22.6892	6.45643e-05	0.0149188
Ex-7	LY6E-DT	2.06488	4.21585	22.2744	6.85489e-05	0.0149188
Ex-7	PRKG1	1.52542	7.79204	22.4708	6.86556e-05	0.0149188
Ex-7	DEAF1	1.73288	6.1123	22.1221	6.8815e-05	0.0149188
Ex-7	GTF2IRD1	1.61951	5.4955	21.7756	7.27057e-05	0.0149188
Ex-7	KIF9-AS1	1.31094	7.61513	22.2048	7.38855e-05	0.0149188
Ex-7	RAB11FIP3	1.55593	7.58424	22.1266	7.52216e-05	0.0149188
Ex-7	BANP	1.70299	5.21154	21.5696	7.64959e-05	0.0149188
Ex-5	LRP1B	0.847185	13.8069	24.9065	6.81148e-05	0.0151083
Ex-7	C5AR1	2.30474	5.49893	21.5101	8.14574e-05	0.015316
Ex-7	GABPB2	1.85411	5.73566	21.2792	8.45726e-05	0.015316
Ex-7	RASGEF1C	1.28974	7.3851	21.5263	8.90315e-05	0.015316
Ex-7	LRRC4C	1.04194	9.24964	21.4835	9.07015e-05	0.015316
Ex-7	GRIN1	1.2589	7.98306	21.4165	9.25589e-05	0.015316
Ex-7	TMSB10	-1.6106	6.48377	21.3353	9.29091e-05	0.015316
Ex-7	SDK1	1.43739	8.35027	21.3506	9.43639e-05	0.015316
Ex-7	EIF4A2	-1.47687	6.84712	21.0129	0.000103497	0.015316
Ex-7	RBFOX3	1.22828	8.58847	21.0084	0.000104003	0.015316
Ex-7	AC015923.1	-2.01726	5.10397	20.2853	0.000105666	0.015316
Ex-7	NACA	-2.47883	4.74222	20.0203	0.00011085	0.015316
Ex-7	PKNOX2	1.46507	6.1582	20.5141	0.000111615	0.015316
Ex-7	CERS4	1.80739	7.00161	21.2167	0.000112245	0.015316
Ex-7	AC016598.1	1.64039	5.24491	20.2243	0.000113836	0.015316
Ex-7	RTL8C	-1.90363	5.20681	20.0862	0.000114539	0.015316
Ex-7	RPS14	-2.39859	5.62211	20.1705	0.000114551	0.015316
Ex-7	AC021660.3	-2.22104	5.20027	19.9511	0.000117625	0.015316
Ex-7	CCDC146	1.44793	5.58661	20.1761	0.000117799	0.015316
Ex-5	YPEL1	1.42156	6.55884	24.5423	7.44266e-05	0.0159924
Ex-7	MARS1	1.38096	6.41157	20.1829	0.000125741	0.0160514
Ex-7	NORAD	-1.41885	7.01295	20.2472	0.000129532	0.0162401
Ex-7	HDAC4	1.25024	7.56156	20.0587	0.000136378	0.0165673
Ex-7	ATP6AP1	-1.9351	5.02258	19.4141	0.000136862	0.0165673
Ex-7	ELAVL3	1.53889	7.36838	19.7814	0.00014684	0.0170989
Ex-7	CRTC1	1.38176	6.64336	19.6997	0.00014707	0.0170989
Ex-7	XKR4	1.05675	8.42239	19.7754	0.000148775	0.0170989
Ex-7	ARPC5	-2.15438	4.25548	18.9108	0.000150995	0.0170989
Ex-7	ADAMTS2	2.06468	5.406	19.2059	0.000155727	0.0173549
Ex-7	SLC16A1-AS1	1.18412	8.13684	19.4126	0.000165657	0.0175632
Ex-7	PRR14L	1.45709	6.7426	19.3078	0.000165733	0.0175632
Ex-7	RIT2	1.04646	9.36193	19.3854	0.000166694	0.0175632
Ex-7	SNED1	1.23183	7.38023	19.3516	0.000167602	0.0175632
Ex-5	ZNF804A	1.09622	8.1653	23.9818	8.46516e-05	0.0176383
Ex-5	STAT1	-1.92766	5.52629	23.3679	9.28914e-05	0.0178383
Ex-5	MSTRG.1784	1.23814	8.69616	23.569	9.33595e-05	0.0178383
Ex-5	ZEB2	0.893851	8.6188	23.4562	9.59136e-05	0.0178383
Ex-5	SPARCL1	-0.926253	9.2453	23.4522	9.59886e-05	0.0178383
Inh-4	TMEM117	0.978766	8.5188	35.8165	1.41753e-05	0.0184097
Inh-4	AL589740.1	1.14508	8.36573	35.1375	1.58787e-05	0.0184097
Ex-7	SPTBN4	1.21827	8.22747	19.1533	0.000178978	0.0184794
Ex-5	ARL17B	3.09227	7.24197	35.0098	0.000104035	0.0188248
Ex-7	GMFB	-1.74293	5.05919	18.4574	0.000186617	0.018989
Ex-7	CACNG3	1.18837	7.85573	18.873	0.000194502	0.0191876
Ex-7	LDB2	1.11315	8.1783	18.8605	0.000195417	0.0191876
Ex-7	DCSTAMP	1.88092	4.49336	18.5634	0.000198166	0.0191876
Ex-7	MINK1	1.42468	5.99565	18.5535	0.000199501	0.0191876
Ex-7	AC011603.3	1.52744	6.10271	18.4638	0.000205851	0.01928
Ex-7	LINC00342	1.16695	7.62238	18.6784	0.000205953	0.01928
Ex-7	RPL32	-2.04142	5.19986	18.0158	0.000216441	0.0197671
Ex-7	RPL37A	-1.45222	6.95118	18.5128	0.000216787	0.0197671
Ex-7	RAB40C	1.47282	6.33428	18.2074	0.000226573	0.0199972
Ex-7	FBXO42	1.25161	7.0892	18.3081	0.000228194	0.0199972
Ex-7	PITPNC1	1.63692	5.44509	17.9869	0.000228257	0.0199972
Ex-7	DNMT3A	1.42793	6.632	18.2075	0.000230704	0.0199972
Ex-6	SEMA5A	-2.4132	5.50851	35.021	1.7929e-05	0.0200641
Ex-6	SDK1	1.57264	8.70297	34.1117	2.063e-05	0.0200641
Ex-7	AC010210.1	1.28071	5.77508	17.9464	0.000238478	0.020419
Ex-1	AC011379.2	-2.82584	1.93567	62.336	4.0008e-06	0.0208895
Inh-4	SAMD5	1.04291	9.19293	33.2738	2.18459e-05	0.0211068
Ex-7	TLE2	1.61174	4.53134	17.7016	0.000253728	0.0214629
Ex-5	TERF2IP	-1.12128	7.04866	22.3492	0.000125943	0.0221545
Ex-5	LINC00476	1.17653	6.70608	22.0582	0.000135517	0.0221545
Ex-5	AL672310.1.1	-2.00078	5.23022	21.581	0.000137161	0.0221545
Ex-5	LRRC37A3	1.34846	6.63329	21.9934	0.000137649	0.0221545
Ex-5	RSPO3	1.58364	5.17305	21.7019	0.000138546	0.0221545
Ex-7	ARL17B	2.7853	7.75079	24.4833	0.000268786	0.022209
Ex-7	ALDH1A1	-1.57066	5.88275	17.6462	0.000268874	0.022209
Ex-7	RAP1GAP2	1.11942	7.82029	17.7369	0.000275205	0.022304
Ex-7	RORA	1.0393	9.43855	17.7128	0.000276995	0.022304
Ex-7	GNG7	1.14022	7.85868	17.6807	0.000280066	0.022304
Ex-7	KDM2B	1.26144	5.92298	17.4324	0.000283778	0.022304
Ex-7	RPL34	-2.03113	5.46083	17.2418	0.000285908	0.022304
Ex-6	NLGN1	0.892659	10.2668	32.5076	2.7163e-05	0.022341
Ex-6	ADAMTS19	1.1011	8.23904	31.1891	3.43485e-05	0.022341
Ex-6	GRM7	0.99542	9.50716	31.1126	3.47972e-05	0.022341
Ex-6	AC084816.1	0.917655	8.31041	30.8629	3.64223e-05	0.022341
Ex-6	PCDH11X	1.39791	6.83252	29.7967	4.45757e-05	0.022341
Ex-6	KANSL1	1.27523	8.71941	29.7432	4.47153e-05	0.022341
Ex-6	NTNG1	1.918	5.60784	29.0468	4.59422e-05	0.022341
Ex-1	SHISA9	1.09943	8.36778	58.5462	5.72656e-06	0.0224252
Ex-5	MIR137HG	0.885982	9.11085	21.7352	0.000146217	0.0224953
Ex-5	DSCAML1	0.80034	9.20908	21.7078	0.000147221	0.0224953
Ex-7	PLD5	1.12666	7.93416	17.543	0.000292397	0.0225596
Ex-5	TRPM3	0.79549	11.1298	21.594	0.000151468	0.0226412
Ex-5	AL157944.1	-1.23177	7.01729	21.3595	0.000161299	0.0231061
Ex-5	MACROD2	0.696635	10.3056	21.3447	0.000161299	0.0231061
Ex-7	STX8	1.09609	7.14786	17.3468	0.000308563	0.023548
Ex-8	EPHA6	2.56802	6.27667	42.3436	3.56464e-06	0.0236051
Ex-8	TERF2IP	-1.5261	7.2697	38.4367	7.02741e-06	0.0236051
Ex-8	BRINP3	1.18151	8.30674	35.9104	1.06438e-05	0.0238349
Ex-7	ENC1	-1.18082	6.9132	17.2854	0.000317024	0.0239336
Ex-7	ANKRD24	1.49412	6.00557	16.9406	0.000330899	0.0247153
Ex-5	NCAPG2	1.27637	5.3235	20.8755	0.000176211	0.0247271
Ex-3	AC010997.3	-2.9229	3.89604	65.6809	2.30538e-06	0.024784
Ex-3	TERF2IP	-1.22259	7.17629	57.0835	4.65782e-06	0.024784
Ex-3	MMP16	0.972998	9.487	54.8473	5.7493e-06	0.024784
Ex-3	AC060765.1	-1.76536	4.75768	52.2222	7.47633e-06	0.024784
Ex-5	PTPRD	0.70043	12.9392	20.8337	0.000183707	0.0248246
Ex-5	MDGA1	1.76388	4.73115	20.3447	0.000185539	0.0248246
Ex-5	ZDHHC14	0.818928	8.15088	20.7509	0.000187737	0.0248246
Ex-7	AL139260.1	1.18519	7.5456	17.0802	0.000337111	0.0249143
Ex-5	PREPL	-0.815989	7.95602	20.5649	0.000196957	0.0249511
Ex-5	SAMD5	1.73194	5.32083	20.3055	0.000199515	0.0249511
Ex-5	LINC01937	-2.02068	4.67674	19.7072	0.00019958	0.0249511
Ex-7	TSPAN7	-1.53765	6.20104	16.9597	0.00034212	0.0250211
Ex-5	ANKRD18A	1.13936	5.96927	20.4136	0.000204361	0.0250926
Ex-7	MLXIPL	1.88329	4.71114	16.7342	0.00034922	0.025277
Ex-5	PJA2	-0.888517	7.42238	20.3109	0.000210507	0.0253938
Ex-5	AC010280.1	1.26912	6.28203	20.1935	0.000217121	0.0255494
Ex-5	RALYL	0.764375	12.6124	20.1444	0.000219556	0.0255494
Ex-5	ROBO1	1.00537	9.62694	20.0861	0.000222945	0.0255494
Ex-6	GRM3	1.19049	8.36464	28.3772	5.78679e-05	0.0256239
Ex-6	GRM1	0.838223	8.8421	27.942	6.28931e-05	0.0256239
Ex-6	TERF2IP	-1.63727	7.016	27.8617	6.39845e-05	0.0256239
Ex-3	PDE1A	1.07323	9.61622	49.4807	9.82792e-06	0.0260636
Ex-5	KANSL1	1.07306	8.31273	19.9017	0.000234062	0.0262709
Ex-5	RYR3	0.656436	9.79093	19.8365	0.000238023	0.0262709
Ex-5	MYO16	1.52796	6.65548	19.8984	0.000240702	0.0262709
Ex-7	TOMM20	-1.42509	6.4178	16.7565	0.000369614	0.0264802
Ex-7	TUBA1B	-1.22692	7.12648	16.747	0.000376231	0.026682
Ex-7	GYS1	1.3519	6.19787	16.5282	0.000384418	0.02699
Ex-5	FAM155A	0.656843	12.4654	19.6313	0.000251257	0.0269945
Ex-7	AC092640.1	2.10177	5.87899	17.3414	0.000396204	0.0273066
Ex-7	BEX3	-1.39419	5.85204	16.4256	0.000398901	0.0273066
Ex-7	MCRIP1	1.50908	4.64488	16.2407	0.000402125	0.0273066
Ex-7	RPS6	-2.02365	4.88862	16.0092	0.000406115	0.0273066
Ex-7	DPH6-DT	1.52807	6.70745	16.3733	0.000411437	0.0273066
Ex-7	MSTRG.2760	1.44675	4.97493	16.1331	0.000412263	0.0273066
Ex-5	PBX1	0.679568	9.57046	19.5195	0.000258828	0.02738
Ex-7	HIVEP3	1.1744	7.76958	16.3916	0.000420335	0.0274737
Ex-7	TTC8	-1.28305	6.26171	16.3284	0.000422612	0.0274737
Ex-7	MT-ND6	2.49315	5.59096	17.9803	0.000430339	0.0277193
Ex-7	OPCML	0.871756	10.8553	16.2818	0.00043511	0.0277719
Ex-6	NELL1	-1.23741	7.74751	26.9818	7.5915e-05	0.0278731
Ex-6	CXXC4	2.32498	5.81441	26.3012	7.77892e-05	0.0278731
Ex-7	FNBP1L	2.03136	4.91393	15.9989	0.000441615	0.0279294
Ex-7	LINC01950	1.3518	5.43252	15.938	0.000445533	0.0279294
Ex-7	AC008670.1.1	1.64223	6.1864	16.0094	0.000450328	0.0279352
Ex-7	PCBP1	-1.91364	4.82923	15.623	0.000461642	0.0279352
Ex-7	RERG	1.38326	5.53433	15.8346	0.000462891	0.0279352
Ex-7	TMSB4X	-1.47112	6.397	16.0122	0.000469034	0.0279352
Ex-7	AC096576.2	-1.50963	6.94309	16.0302	0.000472117	0.0279352
Ex-7	ATP6V1F	-2.18109	4.65683	15.521	0.000473447	0.0279352
Ex-7	MROH1	1.29386	7.48561	16	0.000475303	0.0279352
Ex-7	KCNMB2-AS1	-1.32339	6.63525	15.9852	0.000477457	0.0279352
Inh-4	SNTG1	0.922342	11.757	30.1944	3.80639e-05	0.0279948
Inh-4	EPHA6	0.970537	10.7176	29.5917	4.26221e-05	0.0279948
Inh-4	PLCB4	1.03816	8.09083	29.3704	4.44677e-05	0.0279948
Inh-4	CSMD1	0.93005	12.7797	28.9352	4.82919e-05	0.0279948
Ex-7	RPL23	-2.03037	5.02276	15.5256	0.000483771	0.0280707
Ex-7	KAZN	0.838024	10.5134	15.9182	0.000489423	0.0281659
Ex-7	PTPRN2	0.987529	9.48707	15.8416	0.000501927	0.0286506
Ex-7	ARPP19	-1.01932	8.29628	15.7887	0.000511093	0.0288203
Ex-7	CACNG2	1.21438	7.18049	15.7399	0.000515651	0.0288203
Ex-7	ACTG1	-1.29085	6.16482	15.6918	0.000517214	0.0288203
Ex-7	ABR	1.24816	7.6098	15.6155	0.000539818	0.029703
Ex-7	GPATCH2	-1.24026	8.35255	15.6118	0.000541516	0.029703
Ex-7	PTDSS2	1.59926	4.57537	15.346	0.00054601	0.0297173
Ex-5	DGKH	-1.34619	5.9284	19.156	0.000286467	0.0298446
Ex-7	FRMD4A	0.832271	11.2981	15.507	0.000559811	0.0301558
Ex-7	CLIP2	1.27197	7.24166	15.4732	0.000562933	0.0301558
Ex-7	HS3ST4	0.913278	9.099	15.4703	0.00056695	0.0301558
Ex-5	LUZP2	0.915607	9.09118	19.0134	0.000296333	0.0302256
Ex-5	SLC5A4-AS1	1.31545	6.75116	18.995	0.000298915	0.0302256
Ex-7	NXN	1.50807	4.7003	15.1416	0.00058005	0.0303316
Ex-7	TNRC18	1.16686	6.78142	15.3518	0.000581281	0.0303316
Ex-7	INSR	1.07137	7.19888	15.3709	0.000583217	0.0303316
Ex-7	TUBB	-1.5054	5.2806	15.0484	0.000593637	0.0305201
Ex-7	CROCCP3	1.36498	6.10516	15.1694	0.000598106	0.0305201
Ex-7	IGSF21	1.23875	6.9959	15.2692	0.000599882	0.0305201
Ex-1	ASXL3	0.98331	7.33676	52.6669	9.75293e-06	0.030554
Ex-6	DPH6-DT	1.74647	6.76985	26.1166	9.04883e-05	0.0308022
Inh-6	LINC01322	1.36985	7.77549	34.9633	2.07144e-05	0.0316931
Ex-7	RPS8	-1.60438	5.18198	14.8452	0.000628356	0.0317388
Ex-7	TMEM108	1.28812	5.98422	14.9637	0.000638774	0.0318501
Ex-7	JAKMIP3	1.13955	6.29553	14.9982	0.00064344	0.0318501
Ex-7	SGCD	0.903525	10.1932	15.0827	0.000644169	0.0318501
Ex-3	TAFA2	0.853981	10.9624	45.3276	1.53874e-05	0.0319532
Ex-3	GRM1	1.45616	8.08509	44.5138	1.68682e-05	0.0319532
Ex-5	DAB1	0.852076	7.93259	18.6446	0.000327581	0.0325325
Ex-5	RAD9A	0.96814	7.22759	18.5184	0.000339596	0.0325325
Ex-5	RIT2	1.00274	8.5242	18.4717	0.00034328	0.0325325
Ex-5	GRIA1	0.788004	8.46325	18.4703	0.000343401	0.0325325
Ex-5	CADM1	0.979366	8.44852	18.4493	0.000345386	0.0325325
Ex-7	TRIM36	-1.56506	5.6017	14.8141	0.000663613	0.032582
Ex-7	UQCRB	-1.86672	5.47993	14.699	0.000673173	0.0327243
Ex-7	MSTRG.1329	1.70793	4.34492	14.7682	0.000675833	0.0327243
Ex-7	NEDD9	1.74374	4.45997	14.6927	0.000691943	0.0330857
Ex-7	MOAP1	-1.73393	4.51677	14.3903	0.00069479	0.0330857
Ex-7	RTN4RL1	1.81691	6.87707	15.9596	0.000697435	0.0330857
Ex-7	MAGI2	0.808444	11.2514	14.7821	0.000712127	0.0331339
Ex-7	RPS11	-1.59351	5.39726	14.5323	0.000715295	0.0331339
Ex-7	MSTRG.821	0.978717	9.03408	14.7587	0.000718232	0.0331339
Ex-7	NHS	1.2413	6.60242	14.6948	0.000719413	0.0331339
Ex-7	PECAM1	1.62439	4.47241	14.5445	0.000722046	0.0331339
Ex-7	SBK1	1.6204	5.18897	14.465	0.000727571	0.0331706
Ex-5	PRELID2	1.60786	5.03533	18.065	0.000361206	0.0332503
Ex-5	PLXDC2	0.824326	9.39552	18.2703	0.000362678	0.0332503
Ex-5	IL1RAPL1	0.629428	10.3439	18.2155	0.000368171	0.0333098
Ex-1	LINC02885	1.26328	6.03094	49.8507	1.28324e-05	0.0335012
Ex-7	FAM193A	1.06411	7.10976	14.5624	0.000763168	0.0342575
Ex-7	AC092535.4	1.24013	5.33734	14.3376	0.00076539	0.0342575
Ex-7	AC012291.3	1.54593	4.92116	14.3101	0.000767936	0.0342575
Ex-7	RRP12	1.27399	5.76417	14.3771	0.000770928	0.0342575
Inh-6	LINC01619	-1.77531	7.34266	32.6946	3.014e-05	0.0345857
Ex-7	LZTS3	1.14011	6.82931	14.4549	0.000786413	0.0346642
Ex-7	COX7C	-1.95805	5.1421	14.1394	0.000789954	0.0346642
Inh-4	KANSL1	1.21303	8.39944	27.2252	6.74858e-05	0.0347796
Inh-4	NPAS3	0.82407	12.4757	26.0964	8.47549e-05	0.0347796
Inh-4	PPP2R2C	0.892799	7.82754	25.9849	8.67744e-05	0.0347796
Inh-4	LRRTM4	0.87176	12.1783	25.2929	0.000100084	0.0347796
Inh-4	FRG1HP	-1.05638	7.0865	25.0362	0.000106372	0.0347796
Inh-4	RGS4	-1.70698	6.24077	24.617	0.000108674	0.0347796
Inh-4	CHSY3	0.815116	8.91231	24.8424	0.000110041	0.0347796
Inh-4	NCAM2	0.828778	11.4957	24.8232	0.00011047	0.0347796
Inh-4	SH3RF3	1.2206	6.38858	24.5003	0.000118915	0.0347796
Inh-4	KCND2	0.851538	11.3971	24.4341	0.000119992	0.0347796
Ex-7	AC110296.1	-1.17976	7.63902	14.4124	0.000808849	0.035227
Ex-7	RBM14-RBM4	1.48677	4.73964	14.1377	0.000817465	0.035227
Ex-7	PPP2R2C	0.887485	8.4649	14.3729	0.000818651	0.035227
Ex-7	RTN4	-0.955614	7.89918	14.3594	0.000822849	0.035227
Ex-3	SHISA9	1.09754	8.75839	41.6221	2.36237e-05	0.0352303
Ex-3	INPP4B	1.13968	8.70843	41.5209	2.3912e-05	0.0352303
Ex-7	CALN1	0.921313	9.17117	14.3187	0.00083314	0.0354514
Ex-7	RYR1	1.65041	4.65975	14.0913	0.000838966	0.0354842
Inh-5	NUTM2B-AS1	-1.33723	7.11398	36.5511	1.58985e-05	0.0355949
Inh-5	PDGFD	1.11513	10.2285	35.9829	1.72418e-05	0.0355949
Inh-5	KCNH7	1.20221	9.34459	35.1668	1.96637e-05	0.0355949
Inh-5	SLC35F4	1.10313	8.61416	33.3398	2.66011e-05	0.0355949
Inh-5	PHACTR1	0.925511	10.2713	32.3639	3.13808e-05	0.0355949
Inh-5	RALYL	1.06825	11.3172	31.5221	3.6309e-05	0.0355949
Inh-5	TENM2	1.3729	9.01698	30.5544	4.31023e-05	0.0362182
Ex-7	CHCHD10	-1.72264	4.87855	13.8288	0.000867893	0.0362538
Ex-7	KIFAP3	-1.01151	8.09702	14.1903	0.000871138	0.0362538
Ex-7	ADARB2	2.07264	5.93106	15.2735	0.000872652	0.0362538
Ex-5	ZNF385D	0.890208	7.58638	17.8325	0.000409766	0.0365024
Ex-5	PPP2R2C	0.713837	8.22112	17.7921	0.000414077	0.0365024
Ex-5	SNHG14	0.569496	12.6457	17.7011	0.000424589	0.036514
Ex-5	AC091078.1	-1.33583	6.56357	17.7198	0.000424828	0.036514
Ex-7	PIK3C2B	1.66786	4.4256	13.9726	0.000884275	0.0365205
Ex-7	AFF2	1.08593	9.09188	14.1106	0.000894502	0.0367269
Ex-5	LRRIQ1	1.57689	4.71513	17.2398	0.000445022	0.0368561
Ex-5	HUNK	-1.23704	5.99182	17.5481	0.000445793	0.0368561
Ex-5	DCC	1.04642	7.93091	17.4665	0.000453738	0.0368561
Ex-5	AC011346.1	1.22401	6.06432	17.4602	0.000453816	0.0368561
Ex-5	TMEM232	0.755352	8.95055	17.45	0.000455609	0.0368561
Ex-7	CHL1-AS2	1.6759	4.93224	13.849	0.000906139	0.0369884
Ex-7	ERBB4	1.25129	7.57208	14.0244	0.000919848	0.037331
Ex-5	FHIT	0.772514	8.65235	17.2866	0.000477113	0.0375059
Ex-5	RASGRF2	0.929991	8.61557	17.2285	0.000485026	0.0375059
Ex-5	CACNG2	0.906547	6.85541	17.2301	0.000486209	0.0375059
Ex-5	FP700111.1	-0.982343	7.72661	17.1656	0.000493975	0.0375059
Ex-5	AC069437.1	-1.2096	5.83723	17.1117	0.000503392	0.0375059
Ex-5	GRIN1	0.857318	8.10307	17.0651	0.000508158	0.0375059
Ex-5	GAB1	1.08871	6.80488	17.0632	0.000509944	0.0375059
Ex-5	PNISR	0.75677	7.913	17.0493	0.000510509	0.0375059
Ex-5	LINC00632	0.685501	9.75374	17.0323	0.000512734	0.0375059
Inh-5	CNTNAP2	0.963831	12.8335	29.2606	5.44706e-05	0.037712
Inh-5	TMEM132C	1.27681	6.82202	29.0033	5.77028e-05	0.037712
Ex-5	SPATS2L	1.31278	5.41874	16.8468	0.000529522	0.037876
Ex-5	NUTM2B-AS1	-1.18736	7.21241	16.8815	0.000536301	0.037876
Ex-5	ABR	0.921814	7.59833	16.8296	0.000543836	0.037876
Ex-5	DENND2B	1.18916	5.43986	16.7624	0.000544954	0.037876
Ex-5	ADAMTS3	1.2954	6.11756	16.8117	0.000545335	0.037876
Ex-7	SLC27A1	1.39495	5.21055	13.7045	0.000949874	0.0380944
Ex-7	ZEB2	0.871631	9.47957	13.9208	0.000954241	0.0380944
Ex-7	NDFIP1	-1.19713	7.44522	13.9237	0.000955837	0.0380944
Ex-7	ATP5MD	-1.49296	5.21293	13.6492	0.000960362	0.0380944
Ex-7	NAP1L2	-1.63716	4.59988	13.4764	0.000967653	0.0381679
Ex-7	RPL27A	-1.73595	5.04133	13.5123	0.000984229	0.0385615
Ex-7	MED23	-1.30766	5.80197	13.7217	0.000988615	0.0385615
Ex-6	PCED1B	-1.70505	6.18035	24.8085	0.000119044	0.038593
Ex-6	SLC22A10	1.0085	7.72177	24.4917	0.000126318	0.0390897
Ex-7	CNTNAP2	0.789206	11.1984	13.7134	0.0010247	0.0396626
Ex-7	UNC80	-0.896515	8.4509	13.7057	0.00102814	0.0396626
Ex-3	ASXL3	0.785085	7.9391	39.6206	3.01576e-05	0.039989
Inh-4	FAM27C	-1.62967	7.25867	23.3728	0.000151717	0.040242
Inh-4	AMMECR1	0.997205	7.87217	23.2564	0.000154971	0.040242
Inh-4	LINC00271	-1.9194	5.53502	22.0631	0.000162903	0.040242
Inh-4	MSTRG.1784	1.12585	9.43217	22.9268	0.000166605	0.040242
Ex-7	MAN1C1	1.03963	8.04146	13.6381	0.00105342	0.0404157
Ex-7	CASTOR2	1.65694	5.39478	13.3945	0.00106337	0.0405581
Ex-7	NTRK2	0.971595	8.93329	13.5765	0.00107526	0.0405581
Ex-7	BAIAP2	1.31535	7.01446	13.5482	0.00107604	0.0405581
Ex-7	HMGB1	1.0717	7.54634	13.5608	0.00108024	0.0405581
Ex-3	CHSY3	0.953878	9.88353	38.6142	3.42178e-05	0.0407651
Ex-3	MLLT3	0.775736	9.26476	37.7102	3.84166e-05	0.0407651
Ex-3	AL391117.1	-2.0508	5.13153	37.5112	3.99658e-05	0.0407651
Inh-5	NEAT1	1.69815	6.79192	27.783	7.2364e-05	0.0408133
Inh-5	CSMD2	0.905251	7.97959	27.3984	7.74142e-05	0.0408133
Inh-5	DSCAML1	0.87325	9.57347	27.0145	8.32642e-05	0.0408133
Ex-7	LINC02755	-1.41679	6.34371	13.4937	0.00109451	0.0408752
Ex-5	SPTBN4	0.794175	8.40495	16.5116	0.000595478	0.0409451
Ex-7	CDR2	1.02218	6.769	13.4738	0.00110294	0.040972
Ex-7	SERINC1	-1.12904	6.68062	13.4415	0.00112531	0.041005
Ex-7	AC011346.1	1.21672	5.95596	13.3282	0.00112572	0.041005
Ex-7	RPL13A	-2.15235	5.09793	13.1355	0.00112633	0.041005
Ex-7	ATP6V1B2	-1.18749	6.11899	13.396	0.00112718	0.041005
Ex-5	AC124854.1	0.999509	6.42798	16.4811	0.000602612	0.0410254
Ex-7	OSBP2	1.01691	7.50794	13.4046	0.00114059	0.0410865
Ex-7	SMAP1	-0.853995	8.16157	13.4019	0.00114309	0.0410865
Ex-7	FAM222B	1.29783	7.63359	13.3729	0.00115263	0.0410865
Ex-7	TSPYL4	-1.51261	5.31394	13.1581	0.0011571	0.0410865
Ex-7	AC016831.6	0.970201	7.51523	13.3472	0.00116402	0.0410865
Ex-7	SNHG14	0.792802	12.4275	13.3454	0.00116454	0.0410865
Ex-7	AC009061.2	1.53004	4.53678	13.1456	0.00117131	0.0411188
Ex-7	PRKAR1A	-1.25282	6.22205	13.2616	0.00118549	0.0414095
Ex-7	KANSL1	1.01545	8.59619	13.2493	0.00120579	0.0417793
Ex-7	MGRN1	1.19699	5.46822	13.0404	0.00121881	0.0417793
Ex-7	DSCAM	0.778408	10.7174	13.2139	0.00121949	0.0417793
Ex-7	DPP7	1.21031	5.2545	13.012	0.00121988	0.0417793
Inh-4	AC008056.1	-1.46132	5.72143	22.1223	0.000180352	0.04182
Ex-9	ZNF804A	1.70105	7.16403	37.0802	1.46171e-05	0.0419706
Ex-9	AC010997.3	-2.69378	5.90409	36.9328	1.55909e-05	0.0419706
Inh-6	AC073050.1	1.19695	10.7252	30.2621	4.59443e-05	0.0421769
Ex-7	SIPA1L3	1.15386	6.45307	13.1166	0.00123792	0.0421913
Ex-7	CLSTN2	0.840787	10.4825	13.1405	0.00125134	0.0422583
Ex-7	LRP1	1.10816	5.68844	13.0011	0.00125192	0.0422583
Ex-7	MARCKS	-1.42945	5.57646	12.9729	0.00126534	0.0423714
Ex-7	STMN1	-1.21801	6.56667	13.0963	0.00126734	0.0423714
Ex-5	LRRTM4	0.681322	12.6602	16.3242	0.000628585	0.042374
Ex-7	CUX1	0.842802	9.86518	13.0828	0.00127714	0.0424224
Ex-7	PKNOX1	1.294	5.99653	12.965	0.00128095	0.0424224
Ex-7	C2CD5	-0.858101	8.01601	13.0486	0.00129424	0.0426587
Ex-7	PART1	1.09517	5.69618	12.8848	0.00130616	0.0426587
Ex-7	MSTRG.1529	-1.21598	5.86578	12.9467	0.00130631	0.0426587
Ex-7	NPTN	-1.05773	7.66252	12.9867	0.00132404	0.0428666
Ex-7	AC004594.1	-1.25779	6.17322	12.9417	0.00132489	0.0428666
Ex-7	CCK	-1.1292	6.55352	12.9572	0.00133147	0.0428819
Ex-7	P2RX7	1.03372	6.97591	12.9011	0.00135403	0.0434095
Ex-7	MYO6	-0.896691	7.53065	12.905	0.00136315	0.0434729
Ex-7	RPL7A	-1.92512	4.94504	12.5582	0.00138031	0.0434729
Ex-7	KCNJ6	1.22868	5.54558	12.6882	0.00138843	0.0434729
Ex-7	MAST1	0.966214	6.84201	12.8238	0.00138986	0.0434729
Ex-7	RAB37	1.34516	6.06094	12.7345	0.00139171	0.0434729
Ex-7	AC087500.1	1.30611	6.20279	12.7511	0.00139316	0.0434729
Ex-5	NRN1	-1.51962	5.34046	16.1018	0.000653684	0.0436382
Ex-7	MYT1L	1.00801	8.49416	12.7913	0.00141742	0.0437232
Ex-7	AC005697.1	-1.9626	4.55093	12.4236	0.00142601	0.0437232
Ex-7	GLRA2	1.15082	6.29535	12.7041	0.00142642	0.0437232
Ex-7	TOMM7	-1.59443	4.99084	12.4819	0.00143258	0.0437232
Ex-7	AC007000.4	1.29789	6.18681	12.6721	0.00143263	0.0437232
Ex-7	SLIT1	0.881205	7.98395	12.7492	0.00143922	0.0437232
Ex-7	RPLP2	-1.43933	5.51426	12.5898	0.00144478	0.0437232
Ex-5	ADCY8	1.20771	5.64608	16.1125	0.000662256	0.0437853
Ex-6	CEMIP	0.937878	7.11498	23.6753	0.000150634	0.0440334
Ex-6	LINC02196	1.00589	8.79963	23.5181	0.000155229	0.0440334
Ex-7	RPL28	-1.33765	5.85231	12.6217	0.00146181	0.0440488
Ex-6	CASC15	0.840536	10.0142	23.3235	0.000161868	0.04408
Ex-7	AC027018.1	-2.04893	4.19377	12.3108	0.00147145	0.0441497
Ex-5	FRMD4A	0.559286	10.7012	16.0475	0.000681516	0.0446296
Ex-7	FGF14	0.741137	11.3208	12.5937	0.00151907	0.0453846
Ex-5	AC120193.1	1.24452	8.39464	16.8945	0.00070151	0.0455055
Ex-6	MSC-AS1	-1.40962	7.83858	22.7903	0.000181943	0.0457324
Ex-6	SHISA9	0.779949	8.87215	22.6713	0.000186728	0.0457324
Ex-6	AC005909.2	-2.84168	6.54415	27.263	0.000188088	0.0457324
Ex-5	ACTB	-0.987486	7.69625	15.883	0.000715709	0.0459927
Ex-7	AC010280.1	1.44744	5.13994	12.3479	0.00154823	0.0460599
Ex-6	TRHDE	0.958005	8.06337	22.2747	0.000204023	0.0461216
Ex-6	MLLT3	0.788393	9.48512	22.2181	0.000206478	0.0461216
Ex-6	RPS6KA2	0.857426	8.76822	22.1428	0.000210013	0.0461216
Ex-5	U91319.1	0.935805	7.2084	15.8121	0.000731731	0.0464706
Ex-5	TENM2	1.28078	7.87731	16.6972	0.000739874	0.0464706
Ex-5	PRR16	0.829334	7.28066	15.7573	0.000743422	0.0464706
Ex-5	ZNF704	0.661544	8.59469	15.7062	0.000753761	0.0466809
Ex-5	ADAMTS2	1.32723	4.95815	15.526	0.000760364	0.0466809
Ex-8	MIR137HG	1.30125	8.14456	29.9565	3.17634e-05	0.0471307
Ex-8	CNTNAP2	0.724767	12.5984	29.4457	3.50779e-05	0.0471307
Inh-4	BRINP3	1.08864	11.1924	21.801	0.000214702	0.0473159
Inh-4	DPH6-DT	2.0445	6.65274	24.3085	0.000221748	0.0473159
Inh-4	KHDRBS2-OT1	1.00707	6.75479	21.5214	0.000229605	0.0473159
Inh-4	CTNND2	0.731636	11.7382	21.3723	0.000236965	0.0473159
Inh-4	NRG3	0.734387	12.1164	21.2309	0.000244864	0.0473159
Ex-7	CFAP251	1.29957	5.07806	12.2583	0.00159854	0.0473559
Inh-4	HIVEP3	0.839389	8.26043	20.861	0.000267048	0.0474673
Inh-4	FHIT	0.77109	9.16472	20.7614	0.00027332	0.0474673
Inh-4	KCNIP4	0.867776	12.35	20.6415	0.000281135	0.0474673
Inh-4	GRM1	0.757662	9.88652	20.6264	0.000282151	0.0474673
Inh-4	GRID2	0.835261	12.3493	20.5253	0.00028897	0.0474673
Inh-4	PPM1E	0.783532	8.35263	20.4251	0.00029601	0.0474673
Inh-4	AC136759.1	0.92053	8.39438	20.2538	0.000308335	0.0474673
Inh-4	LRRC4C	1.62644	11.4453	23.6658	0.000311153	0.0474673
Inh-5	SLIT2	1.0574	10.7117	25.7947	0.000105851	0.0478937
Ex-7	CDH22	1.27214	5.23478	12.2098	0.00163322	0.0480084
Ex-7	FSD1	1.39409	4.82104	12.1996	0.00163424	0.0480084
Inh-4	AL356124.1	1.1414	5.92824	20.0079	0.000329223	0.0482292
Inh-4	KCTD16	0.753405	10.4515	19.9349	0.000332787	0.0482292
Ex-7	NUTM2B-AS1	-0.989865	6.94924	12.3311	0.00167244	0.0488737
Ex-7	YWHAG	-0.938191	7.18672	12.3245	0.00167762	0.0488737
Ex-7	AC092683.1	1.09098	7.62685	12.3044	0.0016858	0.0489092
Ex-7	ATP5F1E	-1.6878	5.07449	12.0427	0.00169472	0.0489657
Ex-7	CSMD1	0.67596	13.3576	12.2622	0.00171125	0.0492404
Ex-5	RAPGEF5	-0.929615	8.62215	15.4577	0.000811592	0.049385
Ex-7	TDRD3	-1.06603	6.31946	12.2007	0.0017386	0.0498232
Ex-7	TAFA5	1.26562	5.40212	12.0218	0.00176166	0.0502788
Ex-4	ZNF804A	1.16976	8.49689	48.1864	4.77194e-06	0.050573
Inh-5	GPC6	1.0876	8.78035	24.9186	0.000126399	0.0508771
Inh-5	TERF2IP	-1.72183	7.57738	25.4656	0.000129744	0.0508771
Ex-7	KCNQ2	1.06531	6.29818	12.059	0.00180514	0.0511063
Ex-7	ADCY8	1.77529	4.43782	11.9959	0.00180521	0.0511063
Inh-1	SHISA9	1.00218	9.38858	48.098	6.02624e-06	0.0514893
Inh-1	NXPH1	0.960262	11.471	40.2894	1.60203e-05	0.0514893
Inh-1	KCNQ3	0.786243	8.77147	37.7976	2.25642e-05	0.0514893
Inh-1	SH3RF3	0.841824	8.15658	37.1875	2.46015e-05	0.0514893
Inh-1	KCND2	0.818609	11.3181	36.7656	2.61304e-05	0.0514893
Inh-1	PHACTR1	0.879896	8.93419	35.133	3.31716e-05	0.0514893
Inh-1	TERF2IP	-1.47258	7.08454	34.0605	3.89858e-05	0.0514893
Inh-1	KCTD16	0.861484	9.82274	34.0074	3.92887e-05	0.0514893
Inh-1	CNTNAP2	0.774013	13.5507	33.8712	4.01119e-05	0.0514893
Inh-1	SNTG1	0.911646	11.1445	33.4526	4.27705e-05	0.0514893
Inh-1	MB21D2	0.959091	6.68111	33.3023	4.37935e-05	0.0514893
Ex-4	KCND2	1.02535	9.57242	42.5578	9.72327e-06	0.0515236
Inh-4	CROCCP3	1.38835	5.74565	19.427	0.000379382	0.0524622
Inh-4	PTCHD4	0.91057	8.949	19.231	0.00039506	0.0524622
Inh-4	NRXN1	0.807392	11.6533	19.2293	0.000395178	0.0524622
Inh-4	SCP2	-1.22922	6.05099	19.0801	0.000398195	0.0524622
Ex-5	DMD	0.614141	11.2372	15.2204	0.000871287	0.0525524
Ex-7	MYO10	1.1796	6.04019	11.9193	0.00187954	0.052997
Ex-6	NME9	1.21872	5.9043	21.3258	0.000249779	0.0531405
Ex-7	ZC2HC1A	-1.24	6.52372	11.9722	0.00189499	0.0532189
Ex-7	ST8SIA5	0.912353	8.17443	11.9727	0.00190331	0.0532395
Inh-4	AL445123.2	1.07445	6.04994	19.0674	0.000413718	0.0532961
Ex-7	LINC01954	1.42181	5.01757	11.7576	0.00192604	0.0534081
Ex-7	TPT1	-1.55991	5.91598	11.8623	0.00192728	0.0534081
Ex-7	HINT1	-1.10001	6.19241	11.9006	0.00193215	0.0534081
Ex-4	TERF2IP	-1.36429	6.6376	37.7686	1.89089e-05	0.0534843
Ex-4	AC010997.3	-2.46606	4.77794	36.7359	2.25063e-05	0.0534843
Ex-4	PCDH11X	1.19024	6.38922	34.3675	3.15538e-05	0.0534843
Ex-4	CNTNAP2	0.752888	11.8865	31.4452	5.03205e-05	0.0534843
Ex-4	AL672310.1.1	-1.73492	4.76992	31.2381	5.29112e-05	0.0534843
Ex-4	CDHR3	1.0516	5.83527	31.1429	5.31419e-05	0.0534843
Ex-4	TMSB4X	-1.17895	5.92449	30.6666	5.73881e-05	0.0534843
Ex-4	MSC-AS1	-1.43257	6.08977	29.7704	6.6837e-05	0.0534843
Ex-4	RORA	0.794182	8.886	29.7522	6.69695e-05	0.0534843
Ex-4	SAMD5	1.34408	6.68943	29.7323	6.72804e-05	0.0534843
Ex-4	MSTRG.1784	1.09952	8.69451	29.7237	6.72999e-05	0.0534843
Ex-4	EIF2B5	1.43976	3.46486	28.697	7.06529e-05	0.0534843
Ex-7	CCDC57	1.0893	6.86787	11.8784	0.00195373	0.0537928
Inh-1	GALNT18	0.820669	7.32834	32.4272	5.01857e-05	0.0540877
Ex-7	AKAP12	0.921733	6.80871	11.8304	0.00198994	0.0544007
Ex-7	ZNRD1ASP	1.26763	4.80112	11.6642	0.00199131	0.0544007
Ex-7	NCAM2	0.712568	10.467	11.8266	0.00200506	0.054564
Ex-7	MIR4435-2HG	1.13131	6.57496	11.7612	0.002027	0.0549482
Ex-5	PRICKLE2	0.791958	8.49485	15.0188	0.000926118	0.0549762
Ex-5	UQCRB	-1.2908	5.83699	15.0168	0.000928803	0.0549762
Ex-5	MIA2	-0.931087	6.58531	14.998	0.000935459	0.0549762
Ex-5	LRRC37A2	1.88819	4.52925	14.6343	0.000944594	0.0550426
Ex-7	SPIRE2	1.21722	5.11177	11.5963	0.00204754	0.0550665
Ex-7	PIP5K1A	1.01518	7.23508	11.742	0.00206437	0.0550665
Ex-7	NFRKB	-1.66055	4.67506	11.4516	0.00206904	0.0550665
Ex-7	FAM3C	-1.31312	4.94316	11.5008	0.00207715	0.0550665
Ex-7	USF2	1.23396	4.96509	11.5504	0.00207852	0.0550665
Ex-7	CFL1	-1.19693	6.09981	11.687	0.00208232	0.0550665
Ex-7	KCNT1	1.19478	6.35285	11.6644	0.00208627	0.0550665
Inh-5	SEM1	1.24085	6.91039	24.0777	0.000151486	0.0551031
Inh-5	AC011474.1	-2.50868	5.1339	22.205	0.000170545	0.0551031
Inh-5	KANSL1	1.20417	8.52251	23.2902	0.000177578	0.0551031
Inh-5	ARL17B	2.42036	7.42261	25.7297	0.000182703	0.0551031
Inh-5	MSTRG.1496	1.26528	5.96424	23.0184	0.000187362	0.0551031
Ex-7	PSMC6	-1.42296	5.23875	11.5321	0.00209694	0.0551409
Ex-7	RAB11A	-1.0811	6.01419	11.6504	0.00210775	0.0552184
Inh-5	HMGB1	1.26884	7.82473	22.8061	0.0001973	0.0552627
Ex-7	TTLL11	0.853906	8.17125	11.6681	0.00212783	0.0555372
Ex-6	ENC1	-1.14235	6.56537	20.9281	0.000277615	0.0556061
Ex-6	STMN2	-0.981843	7.10076	20.9196	0.000277704	0.0556061
Ex-7	TUBB2A	-1.59408	5.40221	11.484	0.00215149	0.0559109
Ex-7	LINC02853	1.71571	4.82548	11.4656	0.0021656	0.0559109
Ex-7	EID1	-1.2661	4.98892	11.403	0.00216604	0.0559109
Ex-7	ZER1	1.07447	7.30787	11.5979	0.00217718	0.0559927
Inh-4	GAD2	-0.951537	8.08355	18.7382	0.00044706	0.0563336
Inh-4	AC005697.1	-2.47452	5.3933	17.5812	0.000460701	0.0563336
Inh-4	ZSWIM5	1.00923	7.32826	18.5659	0.00046645	0.0563336
Ex-6	STXBP6	-1.68719	5.20793	20.7667	0.000290813	0.0563731
Ex-6	ARHGAP15	1.15421	8.16646	20.5325	0.0003038	0.0563731
Ex-6	SPRY4-AS1	-2.25413	5.25816	20.4243	0.000312034	0.0563731
Ex-6	PRRX1	-1.92832	4.69567	20.2109	0.000314656	0.0563731
Ex-6	CDH20	1.81059	7.56665	22.9507	0.000323539	0.0564783
Ex-7	PEX5L	0.977478	8.96819	11.5484	0.00222231	0.0567537
Ex-7	MIRLET7BHG	1.17414	4.91704	11.3707	0.00222294	0.0567537
Ex-7	SKP1	-1.16432	5.91488	11.4444	0.00226495	0.0568344
Ex-7	HDGFL2	1.35584	4.74986	11.3243	0.0022691	0.0568344
Ex-7	GTF2A1	-1.2687	5.6015	11.3798	0.00228235	0.0568344
Ex-7	CDC14B	0.921731	7.7096	11.4747	0.00228442	0.0568344
Ex-7	RPS20	-1.32564	5.516	11.3596	0.00228633	0.0568344
Ex-7	SNTB1	1.07056	6.97155	11.4456	0.002295	0.0568344
Ex-7	GALNT17	0.784859	8.32056	11.4595	0.00229788	0.0568344
Ex-7	NCALD	1.34727	5.49101	11.3148	0.00229896	0.0568344
Ex-7	DCAF6	-0.821909	7.8079	11.4441	0.00231199	0.0568344
Ex-7	AASDHPPT	-1.18382	5.67353	11.3579	0.00231226	0.0568344
Ex-7	SOD2	-1.34651	5.52453	11.3228	0.00231553	0.0568344
Ex-7	TUBA4A	-1.44006	4.90914	11.1961	0.00232324	0.0568344
Ex-7	CPSF1	1.4798	4.54776	11.2419	0.00235945	0.0568807
Ex-7	PTPRT	0.949675	9.46786	11.3787	0.00236574	0.0568807
Ex-7	AC093523.1	1.2202	6.12908	11.3062	0.00236722	0.0568807
Ex-7	AC009120.2	1.27455	6.32394	11.313	0.00237419	0.0568807
Ex-7	STYXL1	1.32195	4.89634	11.2001	0.00237545	0.0568807
Ex-7	PRICKLE1	0.957496	7.6755	11.3639	0.00238001	0.0568807
Ex-7	TMA7	-1.62166	4.88104	11.1153	0.00238291	0.0568807
Ex-7	NUDT3	-1.04849	6.24658	11.33	0.00238994	0.0568807
Inh-4	SCG3	-1.08543	6.67858	18.4384	0.00048199	0.0570223
Ex-7	FLRT3	1.24247	5.01292	11.1588	0.00241301	0.0572356
Ex-7	MICAL3	0.874726	7.81688	11.3089	0.00243011	0.0574472
Ex-7	TBC1D1	0.955029	6.63504	11.2701	0.00244043	0.0574976
Ex-7	TERF2IP	-1.22302	6.75727	11.2746	0.00245857	0.0577311
Ex-5	MMD2	1.50238	5.23674	14.6528	0.00100343	0.0579799
Ex-1	DPF3	1.1885	4.57933	43.0298	2.65793e-05	0.0579939
Ex-1	SV2C	-2.61801	5.33176	41.9196	2.97553e-05	0.0579939
Ex-1	LINC01619	-1.22005	5.26202	40.9348	3.33213e-05	0.0579939
Ex-5	KCTD16	0.842036	9.23185	14.7183	0.00101465	0.0581392
Ex-7	EIF3H	-1.11168	5.91806	11.1828	0.0025008	0.0583833
Ex-7	AZIN1	-1.14081	5.48564	11.1187	0.00250755	0.0583833
Ex-7	SLC5A4-AS1	1.42994	6.81527	11.6585	0.00251129	0.0583833
Ex-7	AC092691.1	0.66573	12.0265	11.1998	0.00252817	0.058541
Ex-7	AC091946.1	-1.66182	5.22676	11.0059	0.00254608	0.058541
Ex-7	ANKRD11	0.829852	7.76891	11.1807	0.00254914	0.058541
Ex-7	OCIAD1	-0.968605	6.79922	11.1779	0.00255142	0.058541
Inh-1	TENM2	0.910114	11.4995	31.1514	6.15183e-05	0.0586044
Inh-1	CUX2	0.890132	7.58739	30.3971	6.96009e-05	0.0586044
Inh-1	AC073050.1	1.02262	9.24325	30.2164	7.17017e-05	0.0586044
Inh-1	HMGB1	0.895043	7.97126	30.1498	7.25021e-05	0.0586044
Ex-1	SHISA6	-1.31038	4.87457	39.9101	3.75995e-05	0.0588958
Ex-7	KCNQ3	0.732537	10.5931	11.1456	0.00258002	0.0590043
Ex-7	RPL27	-1.93505	4.62668	10.8554	0.00260211	0.0590937
Ex-7	GATD1	1.30373	4.78853	10.9559	0.00260891	0.0590937
Ex-7	TUBB4B	-1.56035	4.87387	10.8819	0.00260918	0.0590937
Ex-5	OPCML	0.542318	12.0691	14.6216	0.00104506	0.0593869
Ex-5	KLHL1	1.65918	4.89439	14.3908	0.0010608	0.0594304
Ex-5	ATP6V1B2	-1.02862	6.04683	14.5596	0.00107131	0.0594304
Ex-5	AC002066.1	1.33095	6.08217	14.5228	0.00107559	0.0594304
Ex-5	NGEF	0.863566	7.54766	14.5162	0.0010804	0.0594304
Ex-7	SLC8A3	1.08986	5.54442	10.9744	0.00263405	0.0594652
Ex-7	UCHL1	-1.02044	7.45754	11.0766	0.0026532	0.0596692
Ex-7	BACH2	0.908767	7.29336	11.0555	0.00266631	0.0596692
Ex-7	WNT3	1.07387	5.78214	10.9645	0.00266858	0.0596692
Ex-7	CDC123	-1.10866	5.68406	10.9669	0.00268538	0.0597201
Ex-7	AC006001.3	1.05863	6.91524	11.0223	0.00268787	0.0597201
Ex-7	CCND3	1.47411	6.86182	11.547	0.00271173	0.059777
Ex-7	AC016042.1	-1.38898	5.05298	10.8245	0.00271189	0.059777
Ex-7	MDH1	-1.14726	6.18783	10.973	0.00272871	0.059777
Ex-7	UQCRH	-1.39942	5.12394	10.8209	0.00272987	0.059777
Ex-7	CELF2	0.675303	11.5578	10.992	0.002733	0.059777
Ex-5	JAK2	-0.841108	7.63762	14.4357	0.00110714	0.0604182
Ex-6	LY6E-DT	1.7639	4.75664	19.074	0.000367164	0.0604246
Ex-6	NRXN1	0.652955	12.6316	19.6593	0.000373428	0.0604246
Ex-6	SGCG	2.10472	5.18789	19.0271	0.0003808	0.0604246
Ex-6	AC073578.2	-1.30777	5.75581	19.6097	0.000381648	0.0604246
Ex-5	TAFA5	1.06332	5.53803	14.3794	0.00111669	0.0604593
Ex-7	MSTRG.2737	1.06671	6.5951	10.9007	0.00279976	0.0610468
Ex-7	SUFU	1.12197	6.05471	10.8476	0.00281464	0.0611813
Ex-6	LINC02458	-3.13328	4.52832	18.3513	0.000395833	0.0612462
Ex-5	XKR4	0.67507	8.95319	14.3242	0.00114544	0.0615316
Inh-1	PDZRN3	0.812168	7.93059	29.4932	8.09108e-05	0.0615541
Ex-7	SCOC	-1.21409	5.17168	10.7067	0.0028739	0.0622766
Ex-7	RPL38	-1.4151	5.08661	10.6596	0.00289674	0.062452
Ex-7	ZMAT3	-1.16658	5.39888	10.7244	0.00289978	0.062452
Ex-7	CPT1C	1.25208	5.44955	10.6981	0.00291329	0.0625511
Inh-1	GRIK1	0.982614	9.57777	29.039	8.73747e-05	0.0627787
Inh-5	SOX6	0.892766	8.59284	21.8783	0.000241298	0.0632467
Inh-5	NTM	0.87192	9.69048	21.6825	0.000251936	0.0632467
Inh-5	LRRC4C	1.00739	8.67299	21.4328	0.000266478	0.0632467
Inh-5	LINGO2	0.834284	11.2948	21.3921	0.000268815	0.0632467
Inh-4	CDK6	-1.87589	5.42427	17.2277	0.000550379	0.0632931
Inh-4	OPRM1	-1.60284	5.92799	17.6119	0.000556831	0.0632931
Ex-7	ZNF785	1.33266	4.42579	10.6486	0.00295727	0.0633018
Inh-4	GPC6	0.861545	10.9646	17.7856	0.000568179	0.063341
Ex-3	NKAIN2	0.734419	11.806	33.1203	7.15973e-05	0.0634098
Ex-3	ADAMTS19	1.17403	7.76093	32.7059	7.59872e-05	0.0634098
Ex-3	CASC15	1.16976	9.07808	32.6571	7.65126e-05	0.0634098
Ex-9	DPH6-DT	1.95501	6.83197	30.3561	4.26232e-05	0.0637028
Ex-9	TERF2IP	-1.27335	7.08315	30.2101	4.73275e-05	0.0637028
Ex-7	DPYS	1.15252	5.47877	10.6341	0.00299277	0.0638669
Ex-1	HTR1F	-2.03726	1.47019	36.8067	4.8386e-05	0.0640866
Ex-1	AC015849.1	2.22803	2.54026	34.046	4.9096e-05	0.0640866
Ex-1	MSTRG.1942	-1.59377	3.97377	37.093	5.32354e-05	0.0641445
Ex-5	PRKG1	0.814435	9.69804	14.1639	0.00120382	0.0641665
Ex-7	SRRM4	1.04664	6.79732	10.6998	0.0030306	0.0642464
Ex-7	CACNA1B	0.756177	9.83	10.7127	0.00303762	0.0642464
Ex-7	DPP6	0.777084	8.9907	10.7132	0.003038	0.0642464
Ex-7	MSTRG.3311	-0.740198	9.20981	10.6933	0.00306026	0.0645227
Ex-6	CBLN2	-1.39627	7.72768	19.4361	0.000426524	0.0645284
Ex-5	LINC00923	-1.79673	5.27945	13.9867	0.00122253	0.0646626
Ex-3	DGCR5	0.801388	7.12534	32.1032	8.29308e-05	0.064686
Ex-7	CALM1	-0.840192	8.46909	10.6771	0.00308021	0.0647489
Ex-7	AL031658.1	1.57939	4.28498	10.5515	0.00310859	0.0650726
Ex-7	RNF213-AS1	1.0186	5.93156	10.5786	0.00311414	0.0650726
Ex-7	GFRA1	1.16693	6.38935	10.5963	0.00312531	0.0651122
Ex-6	AC092422.1	1.17875	7.30574	18.9839	0.000441251	0.0653052
Ex-7	LARGE1	0.783638	9.7999	10.6173	0.00314992	0.0654307
Ex-5	ALG1L9P	-1.31084	6.0744	14.0296	0.00126091	0.0656609
Ex-5	KLHL2	-0.747535	7.48168	14.0005	0.00126757	0.0656609
Ex-5	AL096794.1	-1.42581	5.52168	13.9557	0.00127299	0.0656609
Ex-5	MSTRG.2070	1.0372	7.14937	13.9742	0.0012796	0.0656609
Ex-5	DPP10	0.570052	12.7974	13.9413	0.00129043	0.0657067
Ex-5	MAGI2	0.525372	11.0719	13.9188	0.00129961	0.0657067
Ex-7	TPD52L2	1.02329	5.70274	10.4987	0.00318597	0.0659806
Ex-7	GOT1	-1.24821	5.41687	10.4722	0.00319519	0.0659806
Ex-7	PDCD10	-1.01728	5.99158	10.5303	0.00321377	0.0661697
Ex-7	RPL4	-1.43256	5.12815	10.3922	0.00322495	0.066178
Ex-7	DLGAP4	0.890448	7.09761	10.5412	0.0032358	0.066178
Ex-7	ARHGAP12	-1.45221	5.70742	10.4558	0.0032511	0.066178
Ex-7	FTH1	-1.19966	6.07068	10.5016	0.00325188	0.066178
Ex-5	SMARCD3	0.941445	5.76899	13.8374	0.00133088	0.0667968
Ex-7	SH3PXD2A	0.904165	6.99469	10.4728	0.00331868	0.0673424
Oligo	DISC1FP1	2.28324	5.08243	73.3508	6.36123e-06	0.0676963
Ex-5	LRFN2	0.786041	7.04822	13.7751	0.00136207	0.0678664
Ex-7	SEMA5A	1.38651	5.18674	10.3005	0.00337332	0.0678833
Ex-7	URGCP	1.30912	5.14733	10.2977	0.00337616	0.0678833
Ex-7	AC069228.1	-1.39595	5.75618	10.3665	0.00338106	0.0678833
Ex-7	STXBP3	-1.38472	5.21192	10.2855	0.00338401	0.0678833
Inh-4	TMTC2	0.839574	10.137	17.3332	0.000638799	0.0680249
Inh-4	PREPL	-0.763843	8.0732	17.1841	0.000664932	0.0680249
Inh-4	FGF12	0.701528	11.1064	17.1741	0.000665906	0.0680249
Inh-4	RAD9A	1.11612	7.07443	17.1782	0.000665994	0.0680249
Inh-4	ATP6V1B2	-1.14129	6.62183	17.0333	0.000690924	0.0680249
Inh-4	PLCB1	0.776903	12.065	16.9914	0.000698654	0.0680249
Inh-4	SNRPF	-1.63781	5.13885	16.1673	0.000727399	0.0680249
Inh-4	DOCK4	0.658729	8.73324	16.8359	0.000728073	0.0680249
Inh-4	LRFN2	1.19369	6.20005	16.7356	0.000750775	0.0680249
Inh-4	NXPH1	0.783813	11.4902	16.7175	0.000751198	0.0680249
Inh-4	MT-ND3	1.39555	12.2906	18.7413	0.000752432	0.0680249
Inh-4	PRR16	1.02711	8.16164	16.6582	0.000763347	0.0680249
Inh-4	HIBCH	0.801911	7.04563	16.6425	0.000767488	0.0680249
Inh-4	MGAT4C	0.740927	10.9549	16.603	0.000774477	0.0680249
Inh-1	LINC01619	-1.13305	5.9752	27.8453	0.000107485	0.0686413
Inh-1	PPP2CB	-0.915955	6.40075	27.5975	0.000112218	0.0686413
Inh-1	FAM155A	0.807229	11.6535	27.2526	0.00011923	0.0686413
Inh-1	PLPPR1	1.16274	6.71179	27.1938	0.000120536	0.0686413
Inh-1	LRRC4C	0.823691	11.3984	26.959	0.000125647	0.0686413
Inh-1	ZNF804A	0.931211	10.7933	26.6687	0.000132382	0.0686413
Inh-1	KLF3-AS1	0.978924	6.9418	26.4914	0.000136734	0.0686413
Inh-1	KANSL1	1.27946	8.28686	26.6267	0.000137994	0.0686413
Ex-1	SUSD1	-1.25676	4.91089	35.7524	6.285e-05	0.0688329
Ex-1	AC004946.1	-2.73095	2.57574	35.6332	6.5915e-05	0.0688329
Ex-7	CFAP161	1.19277	5.07702	10.2441	0.00344393	0.0688884
Ex-1	MIR137HG	1.23318	8.92326	34.0836	7.81626e-05	0.06923
Ex-1	AC105450.1	-1.85722	3.20751	34.0695	7.94553e-05	0.06923
Ex-1	BANP	1.63048	5.17927	34.0198	7.95543e-05	0.06923
Ex-7	SLC30A7	-1.06229	6.08141	10.3338	0.00347489	0.0693103
Ex-5	DLG2	0.540138	12.4339	13.6793	0.0014014	0.0693239
Ex-7	CELF5	0.854753	7.63212	10.3543	0.0034855	0.0693249
Inh-1	TRERF1	0.825478	7.5476	25.8323	0.000154227	0.0694169
Inh-1	FRG1HP	-0.803393	7.04442	25.8059	0.000154994	0.0694169
Inh-1	ARHGAP18	1.55634	4.94739	25.823	0.000155655	0.0694169
Ex-7	RPL3	-1.79758	4.76483	10.1012	0.00352325	0.0698779
Ex-1	RALYL	1.10862	11.8683	33.3909	8.58168e-05	0.06997
Ex-1	MSC-AS1	-1.55833	5.80499	33.0928	8.94129e-05	0.06997
Ex-1	ARL17B	2.74767	7.11388	32.3619	9.9035e-05	0.06997
Ex-1	AL158077.2	-1.22115	5.40054	32.1963	0.000101248	0.06997
Ex-1	AC108749.1	-1.89018	2.64827	32.1958	0.000102739	0.06997
Inh-4	PACS1	0.885338	7.41959	16.4153	0.000814973	0.070135
Inh-4	LINC01619	-1.41465	6.38888	16.3282	0.000822698	0.070135
Ex-7	HDAC5	1.25822	5.0147	10.1589	0.00355932	0.0703282
Ex-7	MT-TF	2.90025	4.48828	12.2016	0.00356599	0.0703282
Ex-7	AC068633.1	1.21745	4.76933	10.1365	0.0035863	0.0705306
Ex-1	LRRIQ1	1.63386	5.54749	30.369	0.000132015	0.0708339
Ex-1	ADAMTS2	1.50138	5.05368	30.3856	0.000132153	0.0708339
Ex-1	KANSL1	1.39782	8.31053	30.2169	0.000134323	0.0708339
Ex-1	LINC01814	-1.78494	2.14673	30.1622	0.000134373	0.0708339
Ex-1	TAFA2	0.880219	10.1913	29.94	0.000139896	0.0708339
Ex-1	RFX3	0.738417	9.48999	29.8208	0.000142384	0.0708339
Ex-1	CPT1A	-1.76709	3.09969	29.6724	0.000147527	0.0708339
Ex-1	RSPO2	0.935997	6.90925	29.0113	0.000160737	0.0708339
Ex-1	TMEM179	-2.04141	5.2211	28.7681	0.000166849	0.0708339
Ex-1	AC092110.1	1.7178	4.26488	28.6641	0.00016907	0.0708339
Ex-1	AC093523.1	1.43863	6.20269	28.6219	0.000170677	0.0708339
Ex-1	AL133405.2	-1.73889	1.90383	28.2168	0.000175982	0.0708339
Ex-1	TERF2IP	-1.22523	7.19145	28.1686	0.000182768	0.0708339
Ex-1	KCNH7	0.822339	9.57938	28.1556	0.000183123	0.0708339
Ex-1	PDE1A	1.13276	9.81996	28.0533	0.000186042	0.0708339
Ex-1	LINC01322	1.42993	7.34522	28.0415	0.00018642	0.0708339
Ex-1	P2RX7	1.06811	6.43603	28.017	0.000187186	0.0708339
Ex-1	PTCSC2	-2.04676	2.48967	28.0618	0.000188435	0.0708339
Ex-1	AC115622.1	-1.95503	3.70567	27.9633	0.000189927	0.0708339
Ex-7	IREB2	-1.04897	6.03754	10.2251	0.00361792	0.0708504
Ex-7	MRFAP1	-1.38336	4.99949	10.0729	0.00362867	0.0708504
Ex-7	ATP6V1D	-1.4453	5.37226	10.1254	0.00363284	0.0708504
Ex-1	DUSP15	-1.95461	0.928286	25.8666	0.000196546	0.0708631
Ex-1	MSTRG.3036	-1.20435	4.42987	27.5125	0.000202888	0.0708631
Ex-1	MSTRG.1784	1.03358	9.49601	27.4756	0.000203578	0.0708631
Ex-7	CDKN2D	-1.48328	4.48939	9.98827	0.00365242	0.071035
Ex-6	FAM81A	-0.906104	7.21055	18.5079	0.000495137	0.0717211
Ex-7	CBY1	1.18256	5.01764	10.0569	0.00370504	0.0718593
Ex-5	MORF4L1	-0.94528	6.63778	13.5528	0.00146339	0.0718733
Ex-5	FAXC	-0.92276	6.05856	13.5223	0.00148091	0.072075
Ex-5	CLSTN2	0.536344	10.482	13.4812	0.00149232	0.072075
Ex-5	PVT1	-1.44393	5.90728	13.4718	0.00149894	0.072075
Inh-5	LHFPL2	1.68594	5.5236	20.4053	0.000319152	0.072202
Ex-5	AC093523.1	1.01031	7.23986	13.4286	0.00151988	0.0725741
Inh-4	MIR4500HG	1.00891	6.8713	16.1751	0.00087031	0.0727121
Inh-4	ARHGAP6	0.930799	7.03333	16.1413	0.000878014	0.0727121
Ex-7	AC211476.6	1.1607	5.95157	10.0711	0.00378581	0.0731193
Ex-7	CLTC	-0.875888	7.11651	10.1398	0.00379083	0.0731193
Inh-4	ATP1B1	-0.800574	8.29279	16.0006	0.000911652	0.0735351
Inh-4	FAM110B	-0.892009	7.79856	15.9985	0.000913322	0.0735351
Ex-7	GRIK5	0.9958	6.2979	10.074	0.00382591	0.0735927
Ex-7	ADCY9	0.870864	7.52712	10.1012	0.00384212	0.0735927
Ex-7	MAPT	0.833754	8.42824	10.0991	0.00384682	0.0735927
Inh-4	XRN2	-1.16997	6.01882	15.845	0.000929189	0.0736925
Inh-4	ARL17B	2.47995	7.18517	20.4049	0.000946751	0.0736925
Inh-4	KHDRBS2	0.759756	10.2689	15.8338	0.000953414	0.0736925
Ex-7	YWHAB	-1.00655	7.13252	10.0788	0.00388139	0.0737402
Ex-7	ATP10A	-1.16514	7.45088	10.2002	0.00388218	0.0737402
Ex-7	TRPM2	0.99095	5.93824	10.0105	0.00388604	0.0737402
Ex-5	MSTRG.5008	1.30299	5.07574	13.2593	0.0015574	0.0738529
Ex-7	YWHAZ	-0.832069	7.47462	10.0619	0.00390653	0.0739292
Ex-5	OLFM3	0.575203	10.4216	13.3097	0.00157635	0.0739842
Ex-5	TMTC1	-1.64847	5.55287	13.2543	0.00158169	0.0739842
Ex-3	DPH6-DT	1.55804	6.49221	31.2496	0.000100576	0.0740907
Ex-7	MSRA	0.711621	9.66004	10.0275	0.0039523	0.0744874
Ex-7	DNAJC10	-1.00061	6.44488	10.0107	0.00396712	0.0744874
Ex-7	GRIK1	1.60672	5.0331	9.8838	0.00397819	0.0744874
Ex-7	UBE2R2	0.91297	7.54832	10.0113	0.00397846	0.0744874
Inh-1	NNMT	-2.42588	2.77701	23.3396	0.000174668	0.0748368
Inh-1	NRG3	0.742457	12.0888	24.9543	0.00018166	0.0748368
Inh-1	R3HDM2	0.939713	8.21802	24.8534	0.000185168	0.0748368
Ex-7	AL365295.1	-1.16488	5.89141	9.9437	0.00401778	0.0750234
Ex-7	AC134878.2	1.43341	4.87311	9.84455	0.00403715	0.0751852
Ex-2	TERF2IP	-1.27624	6.9272	52.2244	6.16275e-06	0.0752008
Ex-2	CNTNAP2	0.811178	12.1886	43.1852	1.67142e-05	0.0752008
Ex-2	AC010997.3	-2.3784	3.82822	39.9508	2.54806e-05	0.0752008
Ex-2	TAFA2	1.16898	10.2612	39.4565	2.64874e-05	0.0752008
Ex-2	SAMD5	1.38484	5.81851	39.0455	2.79786e-05	0.0752008
Ex-7	AC124944.2	1.44474	4.9602	9.82785	0.00406253	0.0754578
Inh-1	QRICH2	1.68115	5.50658	24.4536	0.000200687	0.0755027
Inh-1	CHSY3	0.901406	8.18011	23.9486	0.00022022	0.0755027
Inh-1	GABRG3	0.702802	9.88931	23.7782	0.000227629	0.0755027
Inh-1	AC011346.1	1.04584	6.76921	23.7216	0.000230224	0.0755027
Inh-1	SST	-3.29152	3.22105	21.5079	0.000241425	0.0755027
Inh-1	KCNT1	0.876612	6.56968	23.3603	0.000247146	0.0755027
Inh-1	MSTRG.2070	0.994687	7.09233	23.2221	0.000253944	0.0755027
Inh-1	AP002518.2	-1.57326	3.14591	22.8685	0.000260147	0.0755027
Inh-1	MMP16	0.63211	9.32326	22.9277	0.000269194	0.0755027
Inh-1	DPP10	0.80326	13.5872	22.8566	0.000273041	0.0755027
Inh-1	CSMD1	0.757319	12.6536	22.7586	0.000278454	0.0755027
Inh-1	AC093523.1	1.18375	5.81889	22.6495	0.000285026	0.0755027
Inh-1	CELF2	0.65449	9.87412	22.6374	0.000285317	0.0755027
Inh-1	AL356124.1	1.48854	5.67177	22.6481	0.00028542	0.0755027
Inh-1	DLG2	0.638793	11.4694	22.544	0.000290736	0.0755027
Inh-1	MSTRG.1784	1.07692	8.41557	22.3358	0.000303261	0.0755027
Inh-1	AC073569.2	1.17604	3.95271	22.2557	0.00030865	0.0755027
Inh-1	BANP	1.28138	4.87383	22.2246	0.000312135	0.0755027
Inh-1	ANKUB1	-1.11195	4.68913	22.1434	0.000317287	0.0755027
Inh-1	AC007262.2	1.35056	5.21235	22.0742	0.000321267	0.0755027
Inh-1	EPHA6	0.679299	11.0259	21.9571	0.000327612	0.0755027
Inh-1	XYLT1	0.96745	7.63902	21.8915	0.000332084	0.0755027
Inh-1	NEGR1	0.694832	11.4007	21.7955	0.000338681	0.0755027
Inh-1	SYT17	1.09882	5.40212	21.7691	0.000341395	0.0755027
Inh-1	DSCAML1	0.743354	8.27625	21.731	0.000343233	0.0755027
Inh-1	ERBB4	0.742696	13.8055	21.7165	0.000344246	0.0755027
Inh-1	LINC02250	-1.63124	3.29548	21.5343	0.000346437	0.0755027
Inh-1	EXT1	0.64326	8.41756	21.6185	0.000351312	0.0755027
Inh-1	PDE4D	0.712348	10.2422	21.5529	0.000356117	0.0755027
Ex-7	FAM135A	-0.839674	7.89556	9.93656	0.00409892	0.0759327
Ex-7	R3HDM2	0.826301	8.41127	9.9081	0.00414352	0.0763734
Ex-7	DGLUCY	0.920828	6.16631	9.86447	0.00414446	0.0763734
Ex-5	PEBP1	-0.834731	7.05248	13.1658	0.0016531	0.0765395
Ex-5	AC007368.1	1.46292	5.05875	13.0501	0.00165858	0.0765395
Ex-5	ZNF720	-1.32971	4.88885	12.988	0.00166977	0.0765423
Ex-7	AC139720.1	-1.25897	5.69981	9.82473	0.00417724	0.0767183
Ex-7	CDHR3	1.33649	4.78816	9.75229	0.00418503	0.0767183
Ex-7	TYK2	1.23783	4.36872	9.75056	0.00420451	0.0767679
Ex-7	PPIA	-1.21855	5.74011	9.80994	0.0042096	0.0767679
Inh-5	ADARB2	0.896585	12.1113	20.1562	0.00035656	0.0771327
Inh-5	SCG2	-1.3501	6.09902	19.0685	0.000449213	0.0771327
Inh-5	NAV3	0.812243	10.6995	19.166	0.000450481	0.0771327
Inh-5	SRP54	-1.35958	5.31057	18.4963	0.000473963	0.0771327
Inh-5	PKNOX2	0.795027	8.29117	18.9199	0.000478209	0.0771327
Inh-5	BTBD8	-0.733385	8.50069	18.8277	0.000489004	0.0771327
Inh-5	AP002989.1	1.08544	7.19687	18.8143	0.000492329	0.0771327
Inh-5	MICAL3	0.913162	8.10702	18.7818	0.000494565	0.0771327
Inh-5	MAGI2	0.76366	10.6897	18.7643	0.000496302	0.0771327
Inh-5	TMEFF2	0.753615	10.1533	18.6623	0.00050876	0.0771327
Inh-5	MSRA	0.802002	8.93812	18.5491	0.000523095	0.0771327
Inh-5	AC058822.1	-1.28097	5.42812	18.1722	0.000527011	0.0771327
Inh-5	ZDHHC14	0.759081	8.23965	18.4454	0.000536721	0.0771327
Inh-5	CAMK1D	0.732581	9.24098	18.3421	0.000550259	0.0771327
Inh-5	PRKD1	0.809279	9.24629	18.2805	0.000558666	0.0771327
Inh-5	NRG3	0.776988	11.9291	18.2587	0.000561577	0.0771327
Inh-5	RBFOX1	0.765949	13.404	18.2422	0.000563874	0.0771327
Ex-7	PRRC1	-1.41806	4.35858	9.61086	0.00424306	0.0771737
Ex-7	GHITM	-1.42604	5.05547	9.67403	0.00427037	0.0771737
Ex-7	FBXO16	0.901209	6.28723	9.79488	0.00427274	0.0771737
Ex-7	RAB11FIP4	0.963253	6.40064	9.79632	0.00427583	0.0771737
Ex-7	NNT	-0.942899	6.45586	9.80322	0.00430368	0.0774773
Inh-1	KIRREL3	0.822794	9.11286	21.3436	0.000371984	0.0775946
Inh-5	AC016831.6	1.10652	7.62087	18.1313	0.000580681	0.0776265
Ex-7	ITPKA	1.36021	5.28359	9.66858	0.00434415	0.0780058
Ex-5	GABRG2	-0.783427	8.13097	13.0206	0.00173036	0.0780526
Ex-5	CERS4	0.987866	6.7994	13.0265	0.00173064	0.0780526
Ex-5	KCNJ3	0.659844	9.08975	12.9958	0.00174404	0.0780526
Ex-5	RPL38	-1.64585	5.47267	12.935	0.00174812	0.0780526
Inh-4	KLHL29	0.824309	8.10828	15.5748	0.00102401	0.078108
Ex-5	EDIL3	0.888209	7.39573	12.966	0.00176259	0.078191
Ex-7	PACRG	0.728954	8.62262	9.76359	0.00438353	0.0783335
Ex-7	FAM155A	0.780438	11.6416	9.76139	0.00438471	0.0783335
Ex-4	AC093523.1	0.846796	7.07649	26.9207	0.000110905	0.0783578
Ex-7	MSTRG.596	-0.793862	7.35838	9.74572	0.00441986	0.0783712
Ex-7	OGA	-0.779017	8.42735	9.74216	0.00441989	0.0783712
Ex-7	ELOA-AS1	1.05395	5.01903	9.61397	0.00442031	0.0783712
Ex-7	PPIP5K1	0.938089	6.95169	9.72534	0.00443321	0.078402
Ex-5	AC092691.1	0.820117	11.15	12.9276	0.00178286	0.0784895
Ex-5	ZNF804B	1.30168	9.26006	15.3959	0.00182278	0.0784895
Ex-5	KANSL1L-AS1	-1.16099	6.14092	12.8718	0.00182393	0.0784895
Ex-5	GPATCH2	-1.16643	6.419	12.8474	0.00183746	0.0784895
Ex-5	DOK6	0.645043	8.85914	12.833	0.00183868	0.0784895
Ex-5	MSTRG.4067	-0.85934	6.60827	12.8246	0.00184903	0.0784895
Ex-5	KSR2	0.620632	9.39055	12.8153	0.00184923	0.0784895
Ex-7	ARMH1	1.19556	4.81415	9.58523	0.00446659	0.0786346
Ex-7	UBQLN2	-1.27408	4.90211	9.54257	0.00447145	0.0786346
Ex-7	FAM198B-AS1	1.25362	5.68224	9.61443	0.00448669	0.0786346
Ex-7	BMERB1	0.869704	7.72407	9.70235	0.00449116	0.0786346
Ex-5	CNTNAP2	0.583215	11.1209	12.7871	0.00186619	0.0787236
Ex-1	SSBP2	0.708186	8.00769	26.5533	0.000235752	0.0790929
Ex-1	AL512603.2	-1.54024	3.38177	26.5718	0.000237319	0.0790929
Inh-4	SUMF1	-1.19494	7.63653	15.4903	0.00105134	0.0791508
Ex-1	AL023882.1	-1.94458	2.03427	26.3078	0.000243194	0.0791697
Ex-1	AC103810.1	4.39066	3.44596	24.4731	0.000247658	0.0791697
Ex-7	TXNDC16	-0.968017	6.37508	9.66451	0.00454008	0.0792005
Ex-7	AC011330.3	1.04892	5.90267	9.60836	0.00454605	0.0792005
Ex-7	SARAF	-1.02697	6.6208	9.65611	0.00456649	0.0792872
Ex-7	CDC25B	1.30269	5.38104	9.54599	0.00457361	0.0792872
Inh-1	SCG3	-0.81159	6.10857	21.1171	0.00039027	0.0794361
Inh-1	LRRC37A3	1.11193	7.29979	21.0147	0.000398641	0.0794361
Inh-1	LBH	-1.07484	5.22911	21.0172	0.000399238	0.0794361
Ex-5	ZFHX4	1.24091	4.59025	12.5763	0.00189583	0.0794862
Ex-7	AC005225.2	1.29467	5.8239	9.56318	0.0045997	0.0794991
Ex-7	PTPRN	1.06969	6.21502	9.59475	0.00460848	0.0794991
Ex-7	RIN2	1.08734	5.70139	9.52187	0.0046735	0.0800154
Ex-7	BDNF	0.99834	6.01064	9.54224	0.00468559	0.0800154
Ex-7	SEZ6L	0.806727	8.30314	9.59287	0.00468938	0.0800154
Ex-7	GGT7	0.934268	5.99952	9.53402	0.00470413	0.0800154
Ex-7	SEC14L5	0.988987	7.00192	9.57447	0.00470542	0.0800154
Ex-7	CTNNA3	-0.830385	9.41604	9.57823	0.00471288	0.0800154
Ex-7	MGAT5B	1.15301	6.16178	9.52683	0.00471819	0.0800154
Ex-7	CFAP46	1.18502	4.81025	9.44101	0.00473373	0.0800856
Ex-7	CHD3	1.11679	4.84702	9.43267	0.00474741	0.080124
Ex-7	PJA2	-0.821488	7.39198	9.55579	0.00476283	0.0801915
Ex-7	ANKUB1	-1.16529	5.28429	9.42812	0.00479739	0.08058
Ex-5	AC079760.1	-1.03293	5.78472	12.6891	0.00193382	0.0805876
Inh-1	PACRG	0.719682	8.3873	20.796	0.000417475	0.0806688
Inh-1	PLGLB1	-1.71241	3.26278	20.6037	0.000417908	0.0806688
Ex-5	AC007402.1	-1.54448	4.91081	12.4618	0.0019692	0.0811087
Ex-5	GRIP1	0.604817	10.0494	12.6217	0.00196992	0.0811087
Inh-5	SPARCL1	-1.06123	7.49528	17.8632	0.000621862	0.0812843
Ex-5	RNF169	0.946096	5.60262	12.5839	0.00198647	0.0813034
Ex-7	AL356295.1	-1.45385	4.872	9.32995	0.00485207	0.0813041
Ex-4	LINC02885	0.840543	6.98318	26.1119	0.000128929	0.0814119
Ex-4	KANSL1	1.1916	8.48794	25.8057	0.000136554	0.0814119
Ex-4	ARHGAP10	1.21637	4.11192	25.4912	0.000141498	0.0814119
Ex-4	AL138927.1	-2.11631	4.24246	25.5387	0.000145954	0.0814119
Ex-6	AL136531.2	-1.68876	5.83471	17.82	0.000593791	0.0816734
Ex-6	NDST3	-1.01656	7.06623	17.6802	0.00060997	0.0816734
Ex-6	KCNJ6	0.929037	7.29862	17.6513	0.000615264	0.0816734
Ex-6	SPATA6L	1.21317	5.37388	17.4328	0.000625861	0.0816734
Ex-6	CYREN	-1.99212	5.01804	17.4338	0.000647083	0.0816734
Ex-6	SLIT2	1.55763	8.3502	19.6393	0.000649322	0.0816734
Ex-6	SLC7A11	-2.09811	4.78022	17.1658	0.000674771	0.0816734
Ex-6	MARCHF1	0.715132	9.36112	17.2335	0.000683541	0.0816734
Ex-6	PLPPR5	1.10845	6.00602	17.1805	0.000690404	0.0816734
Ex-6	LINGO2	0.671716	10.4015	17.0927	0.00070892	0.0816734
Ex-6	BANP	1.68964	5.20581	16.7675	0.00071424	0.0816734
Ex-6	LRRC37A3	1.52056	7.10453	17.6654	0.000726463	0.0816734
Ex-6	RCAN2	-1.07802	6.71606	17.002	0.00072698	0.0816734
Ex-6	ZNF385D	-1.40843	7.30223	17.2552	0.000731798	0.0816734
Ex-7	SLC39A10	-0.77835	7.71029	9.47958	0.00490641	0.0820189
Inh-5	EPHA5	0.852311	9.24413	17.7186	0.00064235	0.082137
Inh-1	CNTN5	0.849724	11.3804	20.6313	0.000432363	0.0822316
Ex-7	TMEM63B	1.28099	5.20719	9.35048	0.00493222	0.0822544
Ex-6	SORBS2	0.802336	7.41465	16.859	0.000754584	0.0825618
Ex-6	ANO4	-1.02347	6.30003	16.8188	0.000764012	0.0825618
Ex-7	MSTRG.2891	0.865697	7.03214	9.43507	0.00497742	0.0828115
Ex-5	MSTRG.1121	-0.848376	8.21772	12.5198	0.00203729	0.0828898
Inh-4	FAM155A	0.664006	11.8465	15.2538	0.00111914	0.0831751
Ex-7	IL12A-AS1	1.78624	5.54244	9.89513	0.00501364	0.083217
Ex-1	KCND2	1.31806	10.8584	25.7386	0.000269175	0.0837668
Ex-1	LPL	-1.90521	2.71592	25.7163	0.000273791	0.0837668
Ex-1	BBOX1-AS1	2.25604	4.91641	25.5646	0.000278437	0.0837668
Ex-1	U91319.1	1.08267	5.97477	25.3245	0.000288564	0.0837668
Ex-1	TXK	-1.44546	4.16109	25.292	0.000290771	0.0837668
Ex-1	AC074286.1	-1.52686	2.23158	25.1512	0.000294125	0.0837668
Ex-6	UNC5D	0.586515	10.7696	16.6821	0.000789281	0.0839597
Ex-1	MSTRG.2676	-1.45446	4.66835	25.0684	0.000301303	0.0842787
Ex-5	SUSD1	-0.932399	6.20696	12.4623	0.00208533	0.0843454
Inh-4	SLC27A6	0.934097	7.71588	15.1572	0.00115023	0.0844038
Ex-1	LINC01250	0.827597	8.287	24.9163	0.000308684	0.0848286
Inh-1	KCNH7	0.756978	9.10684	20.4094	0.00045341	0.0849848
Inh-4	TAFA2	0.848932	10.3108	15.0376	0.00118901	0.0850304
Inh-4	NPAS1	1.13107	6.80425	14.9986	0.00120404	0.0850304
Inh-4	STAU2	-0.766288	7.7227	14.9734	0.0012129	0.0850304
Inh-4	CELF2	0.626239	10.4495	14.9536	0.00121744	0.0850304
Ex-6	DTNA	-0.809785	8.33625	16.566	0.00081394	0.0852508
Inh-4	LINC01322	0.664849	9.84007	14.8947	0.00123788	0.0854285
Ex-7	SLC25A42	1.37059	5.40863	9.23425	0.00518401	0.0858418
Ex-7	CASTOR3	1.0068	6.72828	9.31554	0.00520013	0.0859061
Ex-7	ABI1	-0.932261	6.36086	9.31129	0.00522077	0.0860446
Ex-4	NEGR1	0.733216	11.4439	24.6012	0.000172177	0.0863498
Ex-4	CSMD1	0.686495	13.0831	24.5252	0.000174756	0.0863498
Ex-4	PRKG1	1.61317	7.79346	26.5168	0.000198858	0.0863498
Ex-4	FRG1-DT	1.11839	5.04912	23.6507	0.00020926	0.0863498
Ex-4	MYT1L	0.703236	9.31135	23.529	0.000212995	0.0863498
Ex-4	LRRIQ1	1.31833	5.37112	23.5307	0.000214322	0.0863498
Ex-4	BTNL9	-1.93504	3.82795	23.0578	0.000234005	0.0863498
Ex-4	KCTD8	0.699971	9.02072	22.9666	0.000238736	0.0863498
Ex-4	TENM2	0.749143	10.6255	22.9618	0.000238967	0.0863498
Ex-4	BANP	1.33808	5.11687	22.8559	0.000245709	0.0863498
Ex-4	SNX31	1.932	4.15657	22.4645	0.000249332	0.0863498
Ex-4	NECAB3	1.34374	3.16611	22.0368	0.00025258	0.0863498
Ex-5	MSTRG.3264	-0.650591	8.57171	12.3588	0.00214823	0.0863813
Ex-7	MAPK10-AS1	-1.2333	5.19816	9.19009	0.00525532	0.0864112
Ex-7	UBE2D2	0.837032	7.21163	9.29469	0.00526992	0.0864489
Inh-4	SLIT2	1.14286	10.512	15.8531	0.00126845	0.0865082
Ex-7	HGF	1.1226	5.05844	9.17046	0.00529415	0.0866438
Ex-1	AC018742.1	-2.72647	5.54683	24.6217	0.000324616	0.0866508
Ex-1	CRACD	-1.24725	3.80664	24.3413	0.000342319	0.0866508
Ex-1	FRG1-DT	1.18567	4.91261	24.3209	0.000343681	0.0866508
Ex-1	FAM81A	-0.792246	7.38979	24.2592	0.000345182	0.0866508
Ex-1	ZBTB7C	0.983719	5.84521	24.1604	0.000351451	0.0866508
Ex-1	CYP7B1	1.05559	5.26839	24.1641	0.000351993	0.0866508
Ex-1	EPHA5	0.74933	7.40705	24.0239	0.000359469	0.0866508
Ex-1	NR3C2	0.730943	8.59118	23.9728	0.000362636	0.0866508
Ex-1	AC097487.1	2.42596	3.93008	23.3915	0.000369068	0.0866508
Ex-1	MIR222HG	1.21956	6.41202	23.85	0.000370633	0.0866508
Inh-4	AC016831.6	0.757741	7.41725	14.7395	0.00129438	0.0867614
Inh-4	PDIA2	1.16067	5.26756	14.7151	0.0013074	0.0867614
Inh-4	SPARCL1	-0.949342	8.89353	14.6527	0.00132618	0.0867614
Inh-4	HMGB1	0.82051	8.07872	14.6302	0.00133469	0.0867614
Inh-4	AC093523.1	1.00847	6.91101	14.602	0.00134699	0.0867614
Inh-5	FAM81A	-1.13585	6.87901	17.4193	0.000695212	0.0870051
Ex-7	BACE2	1.01925	6.34807	9.23288	0.0053395	0.0870512
Ex-7	PCSK1N	-1.01069	6.17568	9.22802	0.00537966	0.0870512
Ex-7	TRNAU1AP	1.05488	5.95552	9.1898	0.00538233	0.0870512
Ex-7	PTPRD	0.641087	10.8102	9.24235	0.00538523	0.0870512
Ex-7	MMD2	1.52906	4.63048	9.13028	0.00541184	0.0870512
Ex-7	TSPYL1	-0.814998	7.11623	9.22374	0.00543459	0.0870512
Ex-7	LAMA4	0.953332	7.03824	9.20524	0.00545193	0.0870512
Ex-7	AC010997.3	-1.50501	5.02767	9.06371	0.00546111	0.0870512
Ex-7	ERN1	1.14418	4.78202	9.08351	0.00547294	0.0870512
Ex-7	ATP1A1	-1.102	6.19724	9.17752	0.00549143	0.0870512
Ex-7	RLIM	-1.17181	4.92457	9.04788	0.00549161	0.0870512
Ex-7	AP005212.4	1.41259	4.53712	9.082	0.0055175	0.0870512
Ex-7	AC004470.2	1.04411	7.1213	9.17609	0.00551802	0.0870512
Ex-7	PTPRO	0.75594	8.45538	9.16655	0.00555484	0.0870512
Ex-7	COL26A1	1.11699	6.1806	9.12224	0.00555979	0.0870512
Ex-7	AF064858.1	1.187	5.01121	9.0393	0.00558249	0.0870512
Ex-7	ARIH2	0.925242	6.18802	9.1158	0.00558908	0.0870512
Ex-7	NDUFA5	-1.08868	5.72432	9.10252	0.00559142	0.0870512
Ex-7	AL589843.1	0.790622	7.22381	9.14356	0.00559966	0.0870512
Ex-7	POLD3	0.955345	5.73444	9.07571	0.00561288	0.0870512
Ex-7	ORC4	-0.916602	6.48107	9.13403	0.00561446	0.0870512
Ex-7	VDAC2	-1.4436	4.40522	8.92768	0.00563371	0.0870512
Ex-7	ZNF814	1.00677	5.19622	9.02652	0.00563431	0.0870512
Ex-7	LDHA	-1.18056	5.14495	9.01489	0.00563766	0.0870512
Ex-7	RNPS1	-1.01441	5.46681	9.05565	0.00564333	0.0870512
Ex-7	HDX	1.07679	6.02206	9.07623	0.00564744	0.0870512
Ex-7	RRAGA	-1.66306	4.11195	8.9145	0.00565463	0.0870512
Ex-7	KLC1	-0.881146	6.76364	9.11693	0.0056662	0.0870512
Inh-4	TENM2	0.665593	11.6769	14.5046	0.0013831	0.0877627
Inh-4	GPI	0.656338	8.00391	14.4812	0.00139282	0.0877627
Ex-4	TMEM108	0.863832	9.46702	22.2179	0.000278673	0.0879405
Ex-4	CLSTN2	0.625221	10.1951	21.9954	0.000291968	0.0879405
Ex-4	NTM	0.8375	9.40134	21.5572	0.00032032	0.0879405
Ex-4	TAFA2	0.978987	9.00744	21.5013	0.000324162	0.0879405
Ex-4	DGCR5	0.844619	7.48397	21.4367	0.000328711	0.0879405
Ex-4	KIRREL3	0.650089	8.34745	21.417	0.000330051	0.0879405
Ex-4	GRIA4	0.77732	9.63699	21.3389	0.000335598	0.0879405
Ex-4	AC117834.1	0.910606	5.66867	21.2052	0.000346514	0.0879405
Ex-4	ADGRB1	0.980089	5.36163	20.9136	0.000369709	0.0879405
Ex-4	SHISA9	0.815677	9.06156	20.8217	0.000375227	0.0879405
Ex-4	AC092813.1	2.4877	3.09633	19.6728	0.000387496	0.0879405
Ex-4	ZNF385D	-0.898756	6.1985	20.6416	0.000390464	0.0879405
Ex-4	NRN1	-1.06477	5.11279	20.5818	0.000396783	0.0879405
Ex-4	IGSF21	0.778755	7.31642	20.4606	0.00040612	0.0879405
Ex-4	AC053513.1	-1.31223	4.6752	20.4203	0.000413359	0.0879405
Ex-4	CHRM3	0.605672	10.3754	20.3295	0.000417934	0.0879405
Ex-4	C8orf34	0.878347	7.19854	20.2184	0.000428427	0.0879405
Ex-4	FGF10	1.65011	3.78958	19.8936	0.000429581	0.0879405
Ex-4	AC090578.1	0.660636	9.43094	20.1967	0.00043039	0.0879405
Ex-4	MMADHC-DT	-0.893132	5.67721	20.0811	0.000442103	0.0879405
Ex-4	KCNH4	1.84603	2.88214	19.1619	0.000444209	0.0879405
Ex-4	GRIN1	0.785615	7.71885	19.7006	0.000480846	0.0879405
Ex-4	KCNQ2	0.836403	6.52716	19.647	0.000486929	0.0879405
Ex-4	TMEM132D	0.576447	9.82765	19.4077	0.000513683	0.0879405
Ex-4	ZSCAN31	1.14512	5.23655	19.3702	0.000520895	0.0879405
Ex-4	LINC02607	-1.60337	4.72499	19.3348	0.000527166	0.0879405
Ex-4	STAT1	-1.03368	5.9838	19.2865	0.000528423	0.0879405
Ex-4	KCNIP2	1.08684	5.0599	19.3013	0.000529171	0.0879405
Ex-4	PTCSC2	-1.8719	3.13195	18.7971	0.000532645	0.0879405
Ex-4	GRM1	0.615406	9.06545	19.2405	0.000533611	0.0879405
Ex-4	PLCXD3	1.5155	5.33401	19.2203	0.000538944	0.0879405
Ex-4	RAD9A	1.00001	7.19685	19.142	0.000545889	0.0879405
Ex-4	RXFP2	1.61437	3.70671	18.7283	0.000560275	0.0879405
Ex-4	AC007262.2	1.33878	5.07905	19.0427	0.000561084	0.0879405
Ex-4	KCNH7	0.667814	9.79001	19.0066	0.000562971	0.0879405
Ex-4	AC120193.1	1.13662	7.5711	19.0578	0.0005639	0.0879405
Ex-4	SNED1	0.757584	7.72667	18.9971	0.000564253	0.0879405
Ex-5	AP001631.2	1.19683	5.38747	12.2458	0.00220256	0.0880513
Ex-7	PRICKLE2	0.725338	8.19256	9.07421	0.00576556	0.0882012
Ex-7	AP2M1	-1.10923	5.67199	9.02056	0.00576618	0.0882012
Ex-7	AC005537.1	1.00804	5.59321	8.99143	0.00578218	0.0882537
Ex-7	PPP4R3B	-0.898993	6.26349	9.04832	0.00579487	0.0882555
Ex-7	CUTALP	-1.65442	4.57091	8.8634	0.00580812	0.0882659
Ex-7	BRSK2	0.96633	5.99728	8.98993	0.00585284	0.088323
Ex-7	RILPL1	0.974545	6.05964	8.98631	0.00586794	0.088323
Ex-7	RPL37	-1.15339	5.90342	8.99153	0.00587559	0.088323
Ex-7	SMARCAD1	-0.877414	6.42455	9.01523	0.00588559	0.088323
Ex-7	AC002070.1	1.16895	5.41596	8.92587	0.0058982	0.088323
Ex-7	AL137009.1	-1.45891	4.79216	8.84278	0.00590906	0.088323
Ex-7	CCDC91	-0.848351	7.67945	9.00983	0.00591946	0.088323
Ex-7	ZBTB16	0.759406	7.51948	9.00749	0.00592075	0.088323
Ex-7	PEA15	-0.899508	6.60478	9.00319	0.0059251	0.088323
Ex-1	AC060765.1	-1.42952	7.07997	23.5884	0.000387747	0.0884109
Ex-1	GAB1	0.818733	8.059	23.5614	0.000389577	0.0884109
Ex-1	IQCJ-SCHIP1	0.924459	11.3877	23.4809	0.000395095	0.0884109
Ex-7	PC	1.13719	4.69423	8.87905	0.00595303	0.0884451
Ex-7	SLC8A1	0.668611	10.4619	8.99044	0.00595849	0.0884451
Inh-4	MT-ND2	1.05553	11.2408	14.999	0.00142112	0.088583
Inh-4	TAF1D	0.926305	6.27055	14.3772	0.00143967	0.0887845
Ex-7	MYL12B	-1.25979	4.72814	8.79757	0.0060241	0.0891382
Ex-7	CACNA2D3	0.646451	10.2198	8.96068	0.00603057	0.0891382
Ex-7	YWHAH	-0.8652	6.69062	8.95564	0.00604361	0.0891432
Inh-5	NLGN1	0.884092	10.8369	17.2181	0.000728817	0.0893104
Inh-4	PSMD7	-1.88221	4.91031	13.6487	0.00146468	0.0893762
Ex-5	HIBCH	0.803593	7.15885	12.2029	0.00226488	0.0898409
Ex-5	ARHGAP39	1.17105	5.63499	12.1699	0.00227346	0.0898409
Ex-5	NBEAL1	0.833323	6.87312	12.1702	0.00229112	0.0900215
Ex-4	LRRC37A3	1.40535	7.08502	19.8878	0.000596683	0.0903577
Ex-4	LRFN2	0.863605	7.53768	18.5702	0.000622885	0.0903577
Ex-4	MIR137HG	0.722659	9.22793	18.5467	0.000626221	0.0903577
Ex-4	FP700111.1	-0.813537	7.57769	18.4367	0.000642576	0.0903577
Ex-4	GPC5	0.79214	8.17883	18.4277	0.000643912	0.0903577
Ex-4	CMAHP	-0.904982	6.33436	18.4064	0.000647358	0.0903577
Ex-4	PPP2R2C	0.661033	8.26031	18.3537	0.000655168	0.0903577
Ex-4	SGCZ	0.594246	9.55429	18.3499	0.000655722	0.0903577
Ex-4	PIGQ	1.041	4.50015	18.3247	0.0006595	0.0903577
Ex-4	AC110614.1	1.26011	4.41101	18.2657	0.000665022	0.0903577
Ex-7	MZF1	1.1716	4.80385	8.79797	0.00615774	0.0904275
Ex-7	FRMD5	0.656867	10.4634	8.90681	0.00616325	0.0904275
Ex-7	AC004980.1	0.796508	7.76892	8.89937	0.00618687	0.0904275
Ex-7	CMIP	0.769704	7.70072	8.89907	0.0061873	0.0904275
Ex-7	AC027288.3	-1.06412	6.40315	8.88682	0.00619562	0.0904275
Ex-7	C1GALT1	-0.967563	6.88172	8.89058	0.00621001	0.0904275
Ex-7	AL136981.4	-1.26861	5.15818	8.77586	0.00622084	0.0904275
Ex-7	CLASRP	1.08046	5.62421	8.80612	0.00623537	0.0904515
Ex-3	DUSP6	-1.70035	3.4733	29.0325	0.000135104	0.0904762
Ex-3	RALYL	0.694259	11.9415	28.233	0.000149764	0.0904762
Ex-3	FAM157C	1.40712	3.59734	27.5572	0.000153755	0.0904762
Ex-3	COL12A1	-1.51315	4.99004	27.986	0.00015616	0.0904762
Ex-3	CFAP54	1.17629	5.5968	27.8928	0.000158924	0.0904762
Ex-3	LRRIQ1	1.57298	5.42711	27.729	0.000163758	0.0904762
Ex-7	FBXL20	0.770902	7.82055	8.87385	0.00625136	0.0904965
Ex-7	PKN2-AS1	0.891026	7.9675	8.86544	0.00627273	0.0906191
Ex-4	KCNT1	0.844797	6.11466	18.2247	0.000676137	0.0906267
Ex-4	TRERF1	0.840392	6.39521	18.1729	0.000684104	0.0906267
Ex-7	VWC2	0.797988	7.06067	8.84695	0.00630601	0.0909127
Ex-6	ARMCX5-GPRASP2	0.892679	6.8869	16.2751	0.000882134	0.0909935
Inh-1	SLC8A1	0.824596	8.61794	19.9968	0.000495727	0.091159
Inh-1	LINC02720	1.46154	3.36476	19.658	0.000513702	0.091159
Inh-1	MICAL3	0.908372	8.00165	19.7056	0.000528323	0.091159
Inh-1	MIR29B2CHG	0.772116	6.87317	19.6718	0.000532347	0.091159
Inh-1	PPARG	0.673171	7.24987	19.5966	0.000541182	0.091159
Inh-1	SSPOP	1.53857	2.87704	19.0635	0.000553024	0.091159
Inh-1	AL132780.1	1.86173	2.69598	18.7372	0.000564806	0.091159
Inh-1	B4GALT6	-0.775019	6.59133	19.3368	0.000573273	0.091159
Inh-1	SNX31	2.42236	3.08622	18.6388	0.000574456	0.091159
Inh-1	ANAPC16	0.867859	5.88195	19.3232	0.000575309	0.091159
Inh-1	CACNA1C	0.754414	9.43843	19.3075	0.000576883	0.091159
Inh-1	RYR1	0.943238	5.4071	19.265	0.000583509	0.091159
Inh-1	DPH6-DT	2.07687	6.5664	22.2565	0.000584983	0.091159
Inh-1	SEPTIN11	0.66928	7.29643	19.245	0.00058503	0.091159
Inh-4	TRERF1	0.947531	6.59144	14.2062	0.00151065	0.0912214
Ex-1	AC099517.1	-2.22669	3.4756	23.1175	0.000424673	0.091429
Ex-1	SCG2	-1.18749	5.52385	23.0546	0.000426172	0.091429
Ex-1	NEGR1	0.620468	11.0596	23.0418	0.000426978	0.091429
Ex-1	EFCAB1	1.47944	2.99674	22.3687	0.000433003	0.091429
Ex-1	HBA1	-2.17118	0.816795	21.1168	0.000446303	0.091429
Ex-1	LINC00836	-2.05724	2.28884	22.7872	0.000450023	0.091429
Ex-1	IL1RAPL2	-1.32599	4.81562	22.5963	0.000462923	0.091429
Ex-1	TRPC4	1.17435	4.80926	22.5556	0.00046892	0.091429
Ex-1	TMEM232	0.749647	8.82212	22.5171	0.000469103	0.091429
Ex-1	ANKRD18DP	-1.63243	3.10343	22.5351	0.00047227	0.091429
Ex-1	AP003108.1	1.69266	2.18604	20.8966	0.000475953	0.091429
Ex-1	AC092661.1	1.35642	2.58416	21.5487	0.000478625	0.091429
Ex-5	AC007262.2	1.36387	5.61185	12.0666	0.00234581	0.0916463
Ex-7	DYNLL1	-0.978843	6.8188	8.82466	0.00637634	0.0917382
Ex-5	RTL8C	-1.21505	5.04563	11.9735	0.0023817	0.0917628
Ex-5	NR2F1-AS1	0.723232	8.24905	12.047	0.00238324	0.0917628
Ex-5	AC016831.6	0.710217	7.92863	12.0404	0.00238882	0.0917628
Ex-7	GABRA1	-0.908997	6.69747	8.81486	0.0063983	0.0918659
Ex-7	USP45	-0.909597	6.06799	8.78759	0.00641885	0.0919729
Ex-4	RFC3	-1.59703	5.2143	17.995	0.000715578	0.0920355
Ex-4	CNTNAP5	0.663521	7.14278	17.8738	0.000734023	0.0920355
Ex-4	TMEM165	-0.86744	6.10473	17.845	0.000739337	0.0920355
Ex-4	NR3C2	0.862311	8.04905	17.7967	0.000747546	0.0920355
Ex-4	MSTRG.4675	0.971804	3.96653	17.677	0.000756841	0.0920355
Ex-4	LRRTM4	0.663086	11.9541	17.6898	0.000766878	0.0920355
Ex-4	SPARCL1	-0.775778	8.5085	17.651	0.000774063	0.0920355
Ex-4	INHBA-AS1	-1.17176	4.48761	17.6647	0.000778675	0.0920355
Ex-4	CACNA1I	0.81526	5.40311	17.6338	0.000780097	0.0920355
Ex-4	TDO2	-2.0634	4.30044	17.6037	0.000792357	0.0920355
Ex-4	SEZ6L	0.897872	7.60294	17.4839	0.000805929	0.0920355
Ex-4	MT-TI	2.48796	3.74964	18.1402	0.000812712	0.0920355
Ex-4	LINC01006	-1.53369	4.70339	17.4734	0.000814485	0.0920355
Ex-4	PKNOX1	1.04065	6.06689	17.4367	0.000816318	0.0920355
Ex-6	RARB	0.742344	7.74989	16.1648	0.000906142	0.0920748
Ex-5	AC005909.2	-1.8989	4.68713	11.718	0.00241089	0.0920959
Ex-7	ZFAND5	-1.15788	5.94337	8.76738	0.00644416	0.0921476
Ex-7	MSTRG.1635	1.03436	5.32871	8.69974	0.00646797	0.0922098
Ex-7	PLEKHG5	1.30157	4.43574	8.69035	0.00647478	0.0922098
Ex-3	MSTRG.2070	0.728883	6.92397	27.2261	0.000176399	0.0922982
Ex-3	PCP4	-1.59356	4.06257	27.1282	0.000181164	0.0922982
Ex-3	CNTNAP2	0.688334	12.6165	26.8154	0.000188726	0.0922982
Ex-3	OLFM3	0.675747	9.67329	26.5688	0.000196649	0.0922982
Ex-3	AC084816.1	0.913844	7.83886	26.2454	0.000207644	0.0922982
Ex-3	NRXN1	0.638445	12.3391	26.1828	0.000209829	0.0922982
Ex-3	SORBS2	0.609112	8.90642	26.0178	0.00021578	0.0922982
Ex-1	CA4	1.50921	3.35001	21.9717	0.000489149	0.0923136
Inh-1	FUT9	0.764591	7.99844	19.1122	0.000602593	0.0927778
Ex-7	NPIPB5	1.33515	5.05017	8.65587	0.00654473	0.09287
Ex-7	CLEC16A	0.818823	7.0556	8.75392	0.00654759	0.09287
Ex-3	LRRTM4	0.65237	11.55	25.7789	0.000224732	0.0931231
Ex-7	ADAMTS17	1.31858	5.70924	8.66711	0.00659082	0.0931969
Ex-7	ERO1A	-1.14383	5.64262	8.68788	0.00659719	0.0931969
Ex-6	PDE1A	0.672666	10.2773	16.0332	0.000938056	0.0932681
Ex-6	AC016687.2	2.00803	9.44591	21.1176	0.000953345	0.0932681
Ex-6	TLK1	-0.799202	7.08582	15.9543	0.000958985	0.0932681
Inh-5	LRRTM3	0.727077	9.36084	16.9097	0.000788774	0.0932973
Inh-5	AC007563.2	1.12054	7.07283	16.8727	0.000799714	0.0932973
Inh-5	SNTG1	0.850165	10.3999	16.8114	0.000808937	0.0932973
Inh-4	CDR2	1.05345	7.30931	14.0778	0.00156536	0.0935504
Ex-7	APLP1	-0.912633	6.25792	8.7137	0.00663652	0.0935643
Ex-7	DNM1L	-0.836239	7.07853	8.71963	0.00665999	0.0937069
Ex-7	PGM2L1	-0.99627	5.58491	8.65515	0.00668014	0.093773
Ex-7	VTI1A	0.731612	8.26856	8.70297	0.00670014	0.093773
Ex-7	COX10-AS1	0.924529	6.2433	8.67109	0.00670475	0.093773
Ex-4	HIC2	1.12874	4.20403	17.2705	0.000840642	0.0937802
Inh-4	PRKD1	0.794326	8.50607	14.0292	0.00158682	0.0938186
Inh-4	AC018730.1	-1.05473	6.04898	13.8922	0.00162852	0.0938186
Inh-4	KCNIP2	1.33035	5.04312	13.9235	0.00164002	0.0938186
Inh-4	TMEM132B	0.603554	8.97376	13.8999	0.00164775	0.0938186
Inh-4	CHRM5	1.46493	5.33131	13.9128	0.00165077	0.0938186
Inh-4	CITED2	-1.71809	4.91957	13.2769	0.00166747	0.0938476
Inh-4	AL591501.1	-1.42771	6.38407	13.7653	0.0016944	0.0941286
Inh-4	MB21D2	1.10704	6.43127	13.7471	0.00172758	0.0941286
Inh-4	MIR29B2CHG	0.811746	6.87191	13.7316	0.00173375	0.0941286
Inh-4	FGF14	0.630532	11.9925	13.6795	0.0017578	0.0941286
Inh-4	TTC21B	-0.856477	6.93201	13.6522	0.00177821	0.0941286
Inh-4	MMP16	0.790422	8.79012	13.6362	0.00178058	0.0941286
Inh-4	RUNX1T1	0.634104	9.96956	13.6254	0.00178612	0.0941286
Ex-1	THEMIS	-1.94855	3.5114	22.1196	0.000507841	0.0944555
Ex-1	NTN4	-1.13667	3.71021	21.987	0.000519858	0.0944555
Ex-1	AC021613.1	1.22811	7.03146	21.8967	0.000525425	0.0944555
Ex-1	AC134878.2.1	1.83577	1.4258	20.4633	0.00052733	0.0944555
Ex-1	GATD3A	-1.74635	2.67301	21.8479	0.000534884	0.0944555
Ex-1	GRM1	1.12248	8.97379	21.7808	0.000536679	0.0944555
Ex-7	KSR2	0.764605	8.63802	8.67501	0.00677526	0.0945163
Ex-7	SSR3	-1.28643	4.49649	8.49098	0.00678482	0.0945163
Ex-5	SUMF1	-0.893087	6.98885	11.9202	0.0024898	0.0945849
Ex-7	THRA	-0.926982	5.91374	8.62509	0.0068347	0.0947488
Ex-7	PURA	-0.842271	6.52863	8.64692	0.00684278	0.0947488
Ex-7	KPNA1	-0.952811	6.65026	8.64493	0.00685459	0.0947488
Ex-7	MSTRG.4736	1.04798	5.56565	8.57418	0.00685664	0.0947488
Ex-7	SHISA9	0.738539	8.99102	8.64	0.00687137	0.0947488
Ex-7	LINC02062	1.05385	5.73921	8.57578	0.00688248	0.0947488
Ex-5	PPP3CA	0.525309	10.5069	11.8903	0.00251141	0.0948817
Ex-5	CTNNA2	0.658658	9.1341	11.8615	0.00253604	0.0951806
Ex-5	FGF14	0.511839	11.8337	11.8485	0.00254701	0.0951806
Ex-6	NETO1	-0.674353	8.27011	15.823	0.000992963	0.0952125
Ex-7	PITPNM2	0.844835	6.40875	8.5947	0.00694153	0.0953747
Inh-4	UNC5C	0.675993	9.37552	13.5492	0.00182692	0.0954113
Ex-7	KLHL2	-0.80158	7.81025	8.60462	0.00697657	0.0954812
Ex-7	VPS35	-1.04097	5.77824	8.56195	0.00698644	0.0954812
Ex-7	NFASC	0.736891	7.99121	8.59955	0.00699008	0.0954812
Ex-7	GALNT14	0.751662	8.22674	8.59053	0.00701525	0.095639
Ex-4	NLGN1	0.575514	10.2928	17.1846	0.000866525	0.0956608
Ex-4	RALYL	0.671563	12.2929	17.1044	0.000883657	0.0957134
Ex-4	FRAS1	0.849787	7.26515	17.0987	0.000885064	0.0957134
Ex-7	UNC13A	0.861913	7.26632	8.57868	0.00704048	0.095797
Inh-4	MSTRG.4295	1.08105	5.87129	13.5196	0.00185099	0.0958052
Inh-7	IQCJ-SCHIP1	2.15316	8.55935	23.3183	5.01712e-05	0.0958521
Ex-5	MSTRG.2397	0.579613	8.77272	11.804	0.00258577	0.0960261
Ex-5	RPE	-0.989143	6.78402	11.7966	0.00259757	0.0960261
Inh-4	SYT1	0.576031	12.4201	13.4614	0.00187505	0.0961917
Ex-6	CPNE8	0.960076	7.02415	15.7401	0.00101836	0.0962917
Ex-4	IL7	-1.79312	3.9734	17.0704	0.000900022	0.0963478
Inh-1	LRRIQ3	1.27677	3.26952	18.6698	0.000643854	0.0964931
Inh-1	SYT1	0.567001	11.9231	18.802	0.000646098	0.0964931
Inh-1	TMEM178B	0.627241	9.47192	18.7673	0.000651201	0.0964931
Inh-1	RAD9A	1.28628	6.94639	18.9392	0.000656568	0.0964931
Ex-6	PTPRK	0.604184	11.4915	15.6597	0.00103785	0.0965461
Ex-6	GPATCH2	-1.25056	7.28976	15.6211	0.00104941	0.0965461
Inh-6	KANSL1	1.37948	8.10618	24.7565	0.000132173	0.0965629
Inh-6	ARL15	0.989568	8.39049	23.7047	0.000164185	0.0965629
Inh-6	LONRF1	-1.89778	6.19487	23.6566	0.000168301	0.0965629
Inh-1	FRMD4A	0.641122	10.9758	18.6137	0.00067427	0.096652
Inh-1	HIVEP3	0.66595	8.27774	18.5511	0.00068397	0.096652
Inh-1	MSRA	0.803506	8.18368	18.5459	0.000684787	0.096652
Inh-1	FGF14	0.600475	11.2851	18.4658	0.000697394	0.096652
Inh-1	AC011379.2	-2.40018	2.61572	17.172	0.000701325	0.096652
Inh-1	DOK6	0.686846	9.14698	18.434	0.000702489	0.096652
Inh-6	AL356124.1	1.22285	7.83178	23.0369	0.00018956	0.0966755
Ex-7	GLMN	-1.01894	6.01712	8.52028	0.00714959	0.0968288
Ex-7	AC002383.1	-0.99089	6.41864	8.53287	0.00716071	0.0968288
Ex-7	DDX17	-0.803076	8.05164	8.53698	0.00717035	0.0968288
Ex-7	RPL5	-1.31162	5.65928	8.47889	0.00718066	0.0968288
Ex-7	DSTN	-0.875355	6.50924	8.52326	0.00719695	0.0968288
Ex-7	RYK	-0.818727	7.16034	8.52635	0.00720787	0.0968288
Ex-7	TMEM120B	1.04983	5.98422	8.4779	0.00721306	0.0968288
Ex-7	MSTRG.4205	-1.07435	5.52511	8.45965	0.00722665	0.0968288
Ex-7	TDO2	-1.13192	5.3865	8.43988	0.00724183	0.0968474
Ex-7	MSTRG.2802	0.819705	6.71965	8.49651	0.00725653	0.0968595
Ex-7	PHACTR3	0.719229	8.2437	8.5008	0.00727806	0.0969626
Ex-5	TESPA1	-1.16725	5.81596	11.7518	0.00263844	0.0970156
Ex-5	MYO6	-0.743391	6.80737	11.7223	0.0026626	0.0971471
Ex-5	AC007000.4	0.819787	5.8592	11.7098	0.00267027	0.0971471
Ex-6	HS3ST4	1.01953	7.47254	15.5484	0.0010715	0.0972633
Ex-4	AC010201.3	-1.40723	3.13706	16.7245	0.000926113	0.0974453
Ex-4	AC096711.2	0.996501	3.97937	16.8387	0.000928663	0.0974453
Ex-7	PHF20	0.854962	6.82048	8.47141	0.00733728	0.0974734
Ex-7	RPL13	-1.07621	5.72578	8.43654	0.00734417	0.0974734
Ex-5	OCA2	-1.0828	5.49369	11.6738	0.00269662	0.0975892
Ex-1	MMADHC-DT	-0.800825	5.44343	21.5355	0.000561918	0.0977752
Ex-1	LINC02664	-1.68892	2.81567	21.5014	0.000570705	0.0977752
Ex-1	AC007262.2	1.6999	5.33902	21.4201	0.000576831	0.0977752
Ex-1	C22orf24	1.22097	3.50281	21.2426	0.000580509	0.0977752
Ex-5	NKAIN2	0.492866	11.4823	11.6563	0.00271801	0.0978483
Ex-7	MSTRG.84	-1.17475	5.98283	8.43806	0.0073874	0.0978621
Ex-7	CBX3	-1.19666	4.96393	8.33649	0.00740452	0.0979042
Ex-7	AP003108.2	1.12533	5.54636	8.37372	0.00744024	0.0981916
Inh-4	FP700111.1	-1.13298	6.8441	13.3573	0.00193862	0.0985803
Ex-7	CSTF3	-0.925275	6.66309	8.42816	0.00749328	0.0986091
Ex-7	LINC01322	1.14165	5.01751	8.32498	0.00751087	0.0986091
Ex-7	UGDH-AS1	1.20438	4.94696	8.32291	0.00751401	0.0986091
Ex-7	NIFK-AS1	1.08914	4.83535	8.31512	0.00752862	0.0986165
Ex-4	LRRC4C	0.786089	9.63135	16.8117	0.000949574	0.0986626
Ex-7	AC002069.2	-1.09541	5.93949	8.38389	0.00754644	0.0986658
Ex-3	ZEB1-AS1	1.34001	4.44216	25.2457	0.00024629	0.0989639
Ex-2	SHISA9	0.992634	9.04707	35.6065	4.41963e-05	0.0989924
Ex-1	AC002451.1	-1.13435	3.17926	21.2652	0.000595699	0.0990473
Ex-1	AC027251.1	1.14503	4.02656	21.1484	0.000606078	0.0990473
Ex-1	AC010632.1	1.42693	2.02649	19.7374	0.000607031	0.0990473
Ex-7	SNHG22	1.13398	4.85966	8.2855	0.0076268	0.0993843
Ex-7	ZBTB8OS	1.00005	7.18092	8.37626	0.00764519	0.0993843
Ex-7	PKD1	0.775385	6.81816	8.37066	0.00765214	0.0993843
Ex-7	G2E3	-1.01663	6.05365	8.35483	0.00766199	0.0993843
Ex-7	TCF20	0.858241	6.49047	8.3547	0.00767223	0.0993843
Ex-7	TOPBP1	-1.11992	5.15966	8.27106	0.00769269	0.0993843
Ex-7	FAM217B	-1.1209	5.33034	8.28739	0.00770048	0.0993843
Ex-4	AFF2	0.913451	6.81426	16.6454	0.000989823	0.0998543
Ex-4	PITPNM2	0.776577	6.59286	16.6037	0.00100023	0.0998543
Ex-4	CUTALP	-1.55049	3.73371	16.5621	0.0010165	0.0998543
Ex-4	LINC01937	-1.39915	4.2195	16.5587	0.00102388	0.0998543
Ex-4	CST3	1.36389	3.24443	16.1371	0.00102932	0.0998543
Ex-4	SIRT2	0.831379	5.13197	16.4761	0.00103668	0.0998543
Ex-4	ARL17B	2.91729	7.51685	23.3065	0.00104928	0.0998543
Ex-4	ZFHX2	1.19629	5.43136	16.295	0.00108437	0.0998543
Ex-4	GLIS1	0.777666	5.91417	16.2715	0.001088	0.0998543
Ex-4	CACNA1E	0.662562	8.77647	16.2338	0.00109679	0.0998543
Ex-4	MARCHF1	0.548306	9.71027	16.1908	0.00110875	0.0998543
Ex-4	SSBP4	0.948526	4.53201	16.1747	0.00111522	0.0998543
Ex-4	AP000943.2	-1.02001	4.69358	16.1663	0.00112203	0.0998543
Ex-4	TRHDE	0.853564	6.95552	16.1092	0.00113213	0.0998543
Ex-4	IQCJ-SCHIP1	0.724455	10.8589	16.0988	0.00113481	0.0998543
Ex-4	AL033504.1	0.92266	6.56467	16.0929	0.00113707	0.0998543
Ex-4	HSPH1	0.890865	6.90227	16.0812	0.00114022	0.0998543
Ex-4	SORBS2	0.697397	8.8287	15.9898	0.00116664	0.0998543
Ex-4	CCDC144NL-AS1	-1.20729	5.99526	15.988	0.0011679	0.0998543
Ex-4	GPATCH2	-1.23892	7.76093	16.9559	0.00116943	0.0998543
Ex-4	ZEB1-AS1	1.03476	5.59814	15.9872	0.001171	0.0998543
Ex-4	CCDC125	0.949472	4.91076	15.9737	0.00117659	0.0998543
Ex-4	PTPRD	0.550717	12.4922	15.9057	0.00119185	0.0998543
Ex-4	MSTRG.3264	-0.564362	8.63905	15.8874	0.00119744	0.0998543
Ex-4	SPTBN4	0.773932	8.24582	15.8279	0.0012158	0.0998543
Ex-4	DYSF	-0.916007	5.18937	15.8101	0.00122393	0.0998543
Ex-4	LRRC37A2	1.43218	4.91091	15.8054	0.00122484	0.0998543
Ex-4	SLC8A1	0.590529	9.86933	15.7987	0.00122486	0.0998543
Inh-5	TRPS1	0.849448	9.05845	16.4445	0.000889903	0.100061
Inh-5	PRKG1	0.77106	10.2081	16.2841	0.000927976	0.100061
Inh-5	RAD9A	1.12243	7.06433	16.2849	0.000931635	0.100061
Inh-5	SGTB	-1.43627	6.01095	16.051	0.000957055	0.100061
Inh-5	PLXNA4	0.845441	7.33572	16.0943	0.000977895	0.100061
Inh-5	DSCAM	0.735006	9.9252	16.0587	0.000984787	0.100061
Inh-5	LINC02607	-1.69368	5.53545	15.7163	0.000986661	0.100061
Ex-7	GOLT1B	-1.12336	6.0111	8.3195	0.007768	0.100072
Ex-7	TIAM2	0.707149	8.0981	8.33243	0.0078015	0.100215
Ex-7	AC009264.1	-1.09571	5.33027	8.25308	0.00781222	0.100215
Ex-7	IQCA1	1.20743	4.81936	8.2267	0.00782196	0.100215
Ex-5	JAK1	-0.785925	7.58988	11.5704	0.00279976	0.100266
Ex-7	REEP5	-0.919702	6.1908	8.30609	0.00784037	0.100268
Ex-7	SELENOO	0.971512	5.35268	8.22849	0.00788024	0.100595
Inh-1	TMEM132B	0.53183	9.03005	18.2067	0.000740114	0.100757
Ex-6	TMEM179	-2.10262	5.20641	15.3745	0.00112523	0.100797
Ex-7	AC137770.1	1.08966	4.47474	8.19698	0.00792154	0.100938
Ex-4	HMGB1	1.04513	7.45513	15.7644	0.00124912	0.101054
Ex-1	EPHA6	0.753532	10.3634	20.9578	0.000626083	0.101103
Ex-7	MLLT11	-1.03624	5.83767	8.25344	0.00795082	0.101128
Inh-5	ZFHX2-AS1	1.36208	5.20412	15.6928	0.00102668	0.101225
Inh-5	KLF3-AS1	0.886569	7.03176	15.8951	0.00103256	0.101225
Ex-1	SCARA3	-1.24601	2.31315	20.6744	0.000653752	0.101753
Ex-1	KCNJ3	0.762995	8.97975	20.6856	0.000659426	0.101753
Ex-1	TOX2	-1.57401	3.77565	20.6649	0.000665231	0.101753
Ex-1	LMO3	0.629943	8.76529	20.6047	0.000669719	0.101753
Ex-1	AR	-1.46692	2.89084	20.5783	0.000678681	0.101753
Ex-1	FAM27C	-1.3262	7.29033	20.5248	0.000680095	0.101753
Ex-1	RFX8	-1.20611	3.73499	20.5072	0.000686117	0.101753
Ex-1	SLX4IP	0.941294	5.28286	20.4875	0.000686596	0.101753
Ex-1	DPH6-DT	2.00203	6.15091	20.4134	0.000696173	0.101753
Ex-1	DLC1	-1.26475	5.62052	20.3826	0.000699199	0.101753
Ex-1	C1orf112	-1.918	4.84214	20.3606	0.00070255	0.101753
Ex-1	CCDC178	1.6264	4.58631	20.3472	0.000708062	0.101753
Ex-7	LINC01357	1.09132	4.78997	8.16639	0.008016	0.101773
Ex-7	MSTRG.2770	1.48701	4.2042	8.18992	0.00804585	0.10189
Ex-7	CFAP61	0.960936	5.52664	8.18847	0.00805423	0.10189
Ex-4	TSHZ3	0.994651	5.4037	15.6736	0.00126925	0.101905
Ex-1	NAGPA-AS1	-1.38081	2.17906	20.1848	0.000715935	0.101949
Ex-8	TMEM108	1.15521	7.87797	24.8552	9.123e-05	0.102147
Ex-7	TMEM132D	0.695789	10.8375	8.23145	0.00812849	0.102404
Ex-7	CORO2B	1.03191	6.06528	8.19247	0.0081379	0.102404
Ex-7	CLIP1	0.796062	7.92613	8.23034	0.00813868	0.102404
Ex-5	SORT1	-0.776623	8.67286	11.476	0.00289038	0.102819
Ex-5	PHACTR1	0.460968	11.0177	11.465	0.00290094	0.102819
Ex-7	PRNP	-0.961495	7.36967	8.21195	0.00820631	0.103071
Inh-4	DPP10	0.643842	11.1419	13.1699	0.00204568	0.10312
Ex-5	MCF2L	0.790809	6.84811	11.4339	0.00293718	0.103212
Ex-5	PGRMC1	-1.0793	5.37495	11.4094	0.00294206	0.103212
Ex-1	AC002383.1	-2.15081	3.54347	20.1273	0.000739195	0.10345
Ex-1	RUNX1T1	0.686978	7.80867	20.0908	0.000739769	0.10345
Ex-1	ZSCAN31	1.11771	4.8247	20.0739	0.000746287	0.10345
Inh-4	PRICKLE1	0.881958	7.83818	13.1272	0.00207273	0.103504
Inh-4	PANTR1	0.778163	7.59199	13.0778	0.00210408	0.103504
Inh-4	LRFN5	0.581464	10.2725	13.058	0.00211582	0.103504
Inh-4	DAB1	0.587971	10.5735	13.044	0.00212471	0.103504
Ex-4	NIPAL2	-1.00902	7.59935	15.5195	0.0013161	0.10365
Ex-4	AL031681.3	1.36396	3.95076	15.409	0.00131858	0.10365
Ex-4	MAPK10-AS1	-1.05821	4.86186	15.5228	0.00132032	0.10365
Ex-6	AL138752.2	-1.41583	4.91059	15.207	0.0011758	0.103959
Ex-4	DEAF1	1.17331	6.06492	15.4554	0.00134012	0.104431
Ex-1	C2orf73	1.38743	2.06053	18.7197	0.00076503	0.104468
Ex-1	DYSF	-0.890362	4.99202	19.8911	0.000769838	0.104468
Ex-1	CHRM3	0.824065	10.387	19.862	0.000773639	0.104468
Ex-7	CACNA1A	1.15634	5.84574	8.11628	0.008349	0.104676
Ex-4	RNF141	-1.43145	3.35412	15.3288	0.00135891	0.104967
Ex-4	LINGO2	0.613323	10.1677	15.3137	0.00138814	0.104967
Ex-4	DISC1FP1	1.16253	4.11504	15.2613	0.00138984	0.104967
Ex-4	SCG2	-1.24809	4.27953	15.3348	0.0013951	0.104967
Ex-4	FARS2	0.548783	8.19749	15.2907	0.00139652	0.104967
Ex-2	AL390816.2	-2.2412	2.22312	31.2452	5.49201e-05	0.105402
Ex-2	MIR137HG	0.98483	8.75833	32.3139	7.08567e-05	0.105402
Ex-2	AL391117.1	-1.51223	6.39687	31.5334	7.96868e-05	0.105402
Ex-2	HMGB1	0.984428	7.66975	31.2356	8.33466e-05	0.105402
Ex-2	CCDC178	1.16087	4.93216	29.3893	0.000111741	0.105402
Ex-2	MMP16	0.819879	9.20701	29.3198	0.000112347	0.105402
Ex-2	RSPO3	1.1136	6.15472	29.1874	0.000114824	0.105402
Ex-2	FRG1-DT	1.0569	5.23255	29.0841	0.000117021	0.105402
Ex-2	AL033504.1	1.18726	5.51283	28.8518	0.000121357	0.105402
Ex-2	AC007563.2	1.31991	6.51866	28.5106	0.00012805	0.105402
Ex-2	AC060765.1	-1.6132	4.91126	28.0158	0.000139203	0.105402
Ex-2	PCSK1	-1.09454	4.9006	27.9132	0.000141445	0.105402
Ex-2	RALYL	0.681138	12.0654	27.5866	0.000149017	0.105402
Ex-6	ZNF804B	-1.85405	9.18419	19.3638	0.00122023	0.105423
Ex-6	SGCD	-1.14881	7.36969	15.0639	0.00122333	0.105423
Ex-2	FRMD6	-1.42384	4.12355	27.2998	0.000157945	0.105574
Ex-2	DACH1	1.21412	7.95705	26.9445	0.000165997	0.105574
Ex-2	AL359636.2	-1.99742	3.15313	26.4663	0.000179986	0.105574
Ex-2	PRKG1	1.09647	9.34469	26.4468	0.000180683	0.105574
Ex-2	LINGO2	1.24714	10.3368	26.0094	0.000211929	0.105725
Ex-2	NOX4	-1.05655	5.63932	24.9724	0.000234018	0.105725
Ex-2	AC092574.2	-1.27467	3.38551	24.9848	0.000238747	0.105725
Ex-2	CDH13	0.86166	7.42003	24.8513	0.000239003	0.105725
Ex-2	AC011379.2	-2.33073	2.40166	23.4466	0.00023935	0.105725
Ex-2	CHRM2	0.896299	6.00747	24.4615	0.000256507	0.105725
Ex-2	KANSL1	1.18653	8.47821	24.7297	0.000258403	0.105725
Ex-2	FAM155A	0.65982	12.0298	24.4033	0.000259076	0.105725
Ex-2	SORBS2	0.853128	7.89836	24.3047	0.000263768	0.105725
Ex-2	LINC02320	-1.73048	3.11397	24.3545	0.000264296	0.105725
Ex-2	GRM1	0.982298	7.64748	24.228	0.00026748	0.105725
Ex-6	MYT1L	0.659877	9.68114	14.9705	0.00125496	0.105754
Ex-6	DISC1FP1	1.78347	5.33577	14.6467	0.00129311	0.105754
Ex-6	HSPA8	1.66032	4.72331	14.441	0.0013055	0.105754
Ex-6	RAPGEF5	-0.660216	8.7679	14.7816	0.00132313	0.105754
Ex-6	RPH3A	-1.14175	5.87074	14.7974	0.0013247	0.105754
Ex-6	IMMP2L	0.70915	9.48247	14.7693	0.00132768	0.105754
Ex-6	SLC8A1	0.594522	10.1517	14.7472	0.00133591	0.105754
Ex-7	SAMD12	0.643925	9.3665	8.13771	0.00845265	0.105758
Ex-7	RPL31	-1.4366	6.38116	8.52921	0.00846549	0.105758
Ex-2	PPP2R2C	0.651463	8.31215	23.9424	0.000281816	0.105934
Ex-2	KCNJ6	0.858319	7.36756	23.7216	0.000293538	0.105934
Ex-2	AP003400.1	-1.21357	4.5185	23.7253	0.000294358	0.105934
Ex-2	LINC02207	-1.42	3.71368	23.4649	0.0003131	0.105934
Ex-2	ENC1	-0.831035	7.24409	23.2648	0.000319576	0.105934
Ex-2	TWIST1	-1.92688	4.02191	23.1543	0.000331078	0.105934
Ex-2	ADGRB1	0.91059	5.0953	23.0881	0.000331209	0.105934
Ex-2	ENPP7P6.1	-2.25382	2.14904	21.302	0.000333369	0.105934
Ex-2	PTPRD	0.608119	12.6962	22.9514	0.00033895	0.105934
Ex-1	LINC01122	1.17572	8.50227	19.7331	0.000793559	0.106072
Ex-1	ZNF706	0.726103	6.92787	19.6178	0.00081196	0.106072
Ex-1	SNX31	2.28232	4.2725	19.4822	0.000813506	0.106072
Ex-1	AC090983.2	-1.08317	3.67086	19.5717	0.000824052	0.106072
Ex-1	LINC02853	1.705	4.35401	19.5316	0.000827169	0.106072
Ex-1	TMEM108	0.862837	9.22972	19.4811	0.000834207	0.106072
Ex-1	CNTN1	0.761843	10.4483	19.3788	0.000851386	0.106072
Ex-1	CCDC192	-0.95595	3.73421	19.3817	0.000855602	0.106072
Ex-1	FANCL	0.788091	5.96051	19.3287	0.000860454	0.106072
Ex-1	NNMT	-1.20364	3.24042	19.2655	0.000877542	0.106072
Ex-1	LRRC37A3	1.41632	6.86235	19.2003	0.000882655	0.106072
Ex-1	AC068481.1	-1.54251	1.38549	18.7329	0.000884905	0.106072
Ex-1	MMP16	0.753084	8.83013	19.1765	0.000886645	0.106072
Ex-1	AL589843.1	0.834817	5.97895	19.1666	0.000888908	0.106072
Ex-1	MAP3K8	-1.38565	1.77603	18.9356	0.00089065	0.106072
Ex-1	AC100822.1	-1.84145	1.79921	18.9886	0.000896153	0.106072
Ex-1	SORCS3	-0.746699	7.66699	19.0988	0.000900638	0.106072
Ex-4	SLC13A3	-0.853659	6.39216	15.1883	0.00143475	0.10611
Ex-4	LINC02763	-2.03671	3.81898	15.1525	0.0014398	0.10611
Ex-4	AC093865.1	1.2382	7.27969	16.0183	0.00144177	0.10611
Ex-7	LSAMP	0.539928	13.4832	8.11542	0.00853044	0.10622
Ex-7	CBWD5	-1.21906	4.82688	7.98288	0.00854615	0.10622
Ex-7	SGSM1	0.772458	7.15748	8.10563	0.00855994	0.10622
Ex-7	MICAL2	0.664443	8.10712	8.10812	0.00856295	0.10622
Ex-4	MSTRG.2070	0.756909	6.64967	15.1302	0.00145679	0.106476
Inh-4	VPS35	-1.27913	5.81055	12.8039	0.00220964	0.106744
Ex-1	AL845311.1	-1.97889	3.47978	18.9902	0.000926497	0.106791
Ex-1	AC092813.1	2.05939	3.48149	18.5582	0.00092843	0.106791
Ex-1	IGFBP2	-1.63263	1.61552	18.5388	0.000958376	0.106791
Ex-1	AC087636.1	-2.28723	2.38035	18.7905	0.000969635	0.106791
Ex-1	STAC2	-1.07772	4.5174	18.6987	0.000978345	0.106791
Ex-1	LINC00440	-1.88114	3.38305	18.7181	0.000979858	0.106791
Ex-1	FP700111.1	-0.892205	7.42089	18.6652	0.00098361	0.106791
Ex-1	SH3BP4	1.65032	1.75003	17.351	0.000990735	0.106791
Ex-1	ANAPC16	0.936694	5.54377	18.6315	0.00099167	0.106791
Ex-1	RASGRF1	-0.943743	5.98249	18.6112	0.000994722	0.106791
Ex-1	RBFOX3	0.94658	8.44769	18.5995	0.000996931	0.106791
Ex-1	ALDH5A1	-0.84855	5.01965	18.5926	0.000999056	0.106791
Ex-1	TAFA1	0.712383	9.9854	18.5664	0.00100371	0.106791
Ex-1	SPRY4-AS1	-1.59782	4.47396	18.4811	0.00102284	0.106791
Ex-1	TIPARP	-1.18691	2.94165	18.4709	0.00103014	0.106791
Ex-1	FAT4	1.80916	4.03144	18.36	0.0010333	0.106791
Ex-1	FGF14	0.679797	11.3589	18.377	0.00104367	0.106791
Ex-1	KCNT2	0.734736	7.56521	18.3671	0.00104586	0.106791
Ex-1	LINC01937	-1.46492	4.07733	18.3686	0.00104828	0.106791
Ex-1	ARC	-2.0456	3.04013	18.3967	0.00104956	0.106791
Ex-1	ANXA4	-1.14683	4.92922	18.3517	0.00104991	0.106791
Ex-7	TRAP1	0.974001	5.94027	8.04894	0.00862462	0.106796
Ex-6	LINC00320	-1.48954	5.16803	14.6857	0.00136927	0.106902
Ex-6	MIR137HG	0.746575	9.13805	14.6275	0.00138181	0.106902
Ex-3	PPP2R2C	0.591915	8.31997	24.5236	0.00027953	0.107036
Ex-3	CDH8	0.657219	8.81306	24.4633	0.000282522	0.107036
Ex-6	TNFRSF25	1.33488	5.28968	14.4387	0.0013997	0.107069
Ex-7	ZFP30	-1.18824	5.74522	8.03245	0.00869059	0.107124
Ex-7	SRRM3	0.792845	7.21595	8.06853	0.00869517	0.107124
Ex-7	MSTRG.2106	1.08552	5.16225	7.98477	0.00869688	0.107124
Ex-5	FAM118A	1.27895	4.84417	11.2039	0.00307252	0.107242
Ex-7	DGCR8	1.08474	4.47818	7.97034	0.00872213	0.107247
Ex-8	NRG3	0.670336	12.6472	23.6697	0.000118657	0.107259
Ex-8	NEGR1	0.697798	11.8388	23.1665	0.000133046	0.107259
Ex-8	SNTG1	0.610751	12.0771	21.2961	0.000206299	0.107259
Ex-8	KANSL1	1.11811	8.57024	21.2315	0.0002096	0.107259
Ex-8	SOD2	-1.31618	6.33419	21.0664	0.000218533	0.107259
Ex-8	CNTN4	0.78899	11.2206	20.6943	0.000238692	0.107259
Ex-8	KCND2	0.949465	8.9433	20.5085	0.000249848	0.107259
Ex-8	SNX31	1.71659	5.15631	20.087	0.00026244	0.107259
Ex-8	GRIA1	0.919336	8.5681	20.2391	0.000267038	0.107259
Ex-8	SLIT2	1.7364	5.56521	20.027	0.000275402	0.107259
Ex-8	ERBB4	2.55626	8.1681	28.2128	0.000282524	0.107259
Ex-8	UNC5C	0.928898	8.31314	19.9439	0.000287387	0.107259
Ex-7	BRSK1	0.950795	5.59578	7.99668	0.00875034	0.107406
Ex-7	AC010422.6	1.15554	4.53941	7.95149	0.00879824	0.107805
Ex-2	COX10-AS1	0.675267	6.27126	22.622	0.000360952	0.107927
Ex-2	ETV5	-1.03506	5.03278	22.6168	0.000361669	0.107927
Ex-2	HIBCH	0.928832	6.91971	22.4998	0.000369421	0.107927
Ex-1	AC073311.1	-2.76243	2.49024	18.3202	0.00107472	0.108052
Ex-1	SPARCL1	-0.95372	8.95553	18.2294	0.00107611	0.108052
Ex-5	FUS	0.841838	6.02921	11.2528	0.00312407	0.108067
Ex-5	ATP6V1E1	-0.941219	5.59586	11.241	0.00313734	0.108067
Ex-5	LINC00159	1.14319	5.29682	11.1955	0.00314332	0.108067
Ex-5	ABCA17P	0.944364	5.65137	11.2046	0.00316341	0.108116
Ex-5	PRKCZ	0.743784	6.3855	11.2011	0.0031833	0.108116
Ex-5	STUM	1.14971	5.24092	11.1467	0.00319189	0.108116
Ex-5	AC087500.1	1.09937	6.26566	11.1576	0.00322854	0.108155
Ex-5	LSAMP	0.623493	12.6316	11.1515	0.00323096	0.108155
Ex-5	MACROH2A1	-0.929589	5.84234	11.151	0.00324382	0.108155
Ex-5	BMP2K	-0.970661	5.63479	11.1116	0.00328198	0.108155
Ex-5	PWRN1	0.878901	7.18439	11.0965	0.00329676	0.108155
Ex-5	AC005225.2	0.979809	6.12414	11.0599	0.003339	0.108155
Ex-5	FAM3C	-0.789011	6.94797	11.0561	0.00334381	0.108155
Ex-5	FANK1	1.33694	4.16897	10.8472	0.00334828	0.108155
Ex-5	NAALADL2	-0.86455	7.50891	11.0295	0.00337201	0.108155
Ex-5	RNF130	0.651685	8.06946	11.0279	0.00337302	0.108155
Ex-5	RPL15	-0.964837	5.84264	11.0275	0.00338511	0.108155
Ex-5	LRRC3B	0.879665	6.42032	10.9957	0.00341728	0.108155
Ex-5	MSTRG.3602	1.18331	6.10075	10.9896	0.00341773	0.108155
Ex-5	MARCHF1	0.799263	8.58434	10.9887	0.00341896	0.108155
Ex-5	STAT4	-1.00261	6.80437	10.9615	0.00345754	0.108155
Ex-5	CA3	1.16156	5.11306	10.8947	0.00346963	0.108155
Ex-5	RNF220	1.09945	6.06673	10.9379	0.00348023	0.108155
Ex-5	DPYD	0.564928	9.19094	10.9345	0.00348391	0.108155
Ex-5	STX8	0.692192	7.22272	10.9111	0.00351548	0.108155
Ex-5	ANKRD13C	-0.721062	7.09702	10.907	0.00352051	0.108155
Ex-5	PLOD2	-1.57358	4.91798	10.7763	0.00352338	0.108155
Inh-1	GRIN2A	0.701198	9.11654	17.7254	0.000827647	0.108205
Inh-1	ADGRL3	0.545345	11.1309	17.6937	0.000833826	0.108205
Inh-1	AC016831.6	0.929959	7.39753	17.6523	0.000842039	0.108205
Inh-1	PRKG1	0.602773	10.5468	17.5767	0.00085704	0.108205
Inh-1	PTPRO	0.855034	7.03736	17.4973	0.000873357	0.108205
Inh-1	GAD1	-0.691456	8.42915	17.4077	0.00089194	0.108205
Inh-1	MYT1L	0.661874	9.45286	17.3727	0.000899344	0.108205
Inh-1	FRG1-DT	1.13815	4.82307	17.368	0.000904575	0.108205
Inh-1	THRB	0.628757	8.67009	17.2917	0.000916809	0.108205
Inh-1	MSTRG.1496	0.776066	6.01759	17.2853	0.000918662	0.108205
Inh-1	CADM1	0.580697	8.95971	17.283	0.000918694	0.108205
Inh-1	FLVCR1	-0.859434	5.29106	17.274	0.0009219	0.108205
Inh-1	AP000943.2	0.698445	6.57269	17.2354	0.000929366	0.108205
Inh-1	CHST11	0.826894	5.61378	17.2338	0.000930465	0.108205
Inh-1	NFE2L3	-1.49652	2.17765	16.2295	0.000931037	0.108205
Inh-1	IQCJ-SCHIP1	1.00763	9.44796	17.3579	0.00093365	0.108205
Inh-1	TYW1B	0.847405	5.51397	17.2051	0.000937059	0.108205
Inh-4	GAD1	-0.703752	8.29266	12.8404	0.00226105	0.108238
Inh-4	MSTRG.4976	1.41265	4.56692	12.7801	0.00227792	0.108238
Ex-7	TUBB4A	-1.0309	6.12756	8.01247	0.00885149	0.108269
Ex-7	FOXK1	0.86531	6.12131	7.98769	0.00889202	0.108575
Ex-7	PDZRN4	0.719107	10.6839	8.00629	0.00892868	0.108776
Ex-7	ATP1B1	-0.817747	7.04548	8.00646	0.00893944	0.108776
Inh-6	PLXNA4	0.857414	9.06205	21.0844	0.000290552	0.108865
Inh-6	ALCAM	0.987799	9.0764	20.9785	0.000297607	0.108865
Inh-6	ANKFN1	-1.37366	6.77452	20.9391	0.000301579	0.108865
Inh-6	FAM27C	-1.2578	7.38804	20.1645	0.00035913	0.108865
Inh-6	PLXDC2	1.91839	6.93177	19.8891	0.000382546	0.108865
Inh-6	ADAM12	1.0152	7.58788	19.6315	0.000407421	0.108865
Inh-6	DLG2	0.846564	12.1977	19.5996	0.000409339	0.108865
Inh-6	NUTM2B-AS1	-1.10763	7.07942	19.4157	0.000428486	0.108865
Inh-6	PCDH7	0.969621	9.44787	19.2506	0.000444759	0.108865
Inh-6	ARHGAP18	1.03123	7.38411	18.7521	0.000503174	0.108865
Inh-6	OPCML	0.822452	10.0917	18.6943	0.000508402	0.108865
Inh-6	NKAIN2	1.03721	9.32307	18.6806	0.000510164	0.108865
Inh-6	DMD	0.85092	9.55502	18.449	0.000539754	0.108865
Inh-6	ZNF804B	-1.24703	9.66237	18.4054	0.00054551	0.108865
Ex-1	TMEM108-AS1	1.52355	2.16776	17.1333	0.00109148	0.108898
Ex-5	OXCT1	-0.798906	6.46607	10.8754	0.00356639	0.108989
Ex-3	PTK2	0.621888	9.35616	24.1037	0.000301197	0.109123
Ex-3	SAMD5	2.40395	4.97869	25.8127	0.000304492	0.109123
Ex-1	MKLN1	0.715277	8.74605	18.09	0.00110784	0.109143
Ex-1	CCDC144CP	1.03638	6.06153	18.0895	0.00110857	0.109143
Ex-1	AC005077.2	-2.81281	1.74858	17.8651	0.00111484	0.109143
Ex-5	AC027682.4	1.40215	5.09021	10.7807	0.00359	0.109225
Ex-6	LINC02254	-1.17938	6.76291	14.4749	0.00144441	0.109262
Ex-6	RALYL	0.649939	12.4623	14.4296	0.00146133	0.109326
Ex-6	OLFM3	0.754793	9.50464	14.3599	0.00149071	0.1094
Ex-6	PLA2R1	-1.5399	4.45302	14.2238	0.00149444	0.1094
Inh-1	AC007563.2	1.45172	4.9422	17.0952	0.00096543	0.109418
Inh-1	GPC6	0.571033	9.91448	17.0745	0.000965527	0.109418
Inh-1	AC010230.1	1.13027	3.50732	16.8582	0.00100607	0.109418
Inh-1	ZNF658B	-2.24387	2.97276	16.2953	0.00101486	0.109418
Inh-1	PNISR	0.677698	8.07588	16.8671	0.00101488	0.109418
Inh-1	RPS6KA2	0.502986	9.85232	16.8655	0.00101524	0.109418
Inh-1	NKAIN2	0.58781	10.2771	16.8575	0.00101719	0.109418
Inh-1	TOX3	0.752052	7.26886	16.8147	0.00102786	0.109418
Inh-1	CDC25B	1.02115	5.09506	16.8201	0.00102946	0.109418
Inh-1	KCTD8	0.63894	9.22535	16.7729	0.0010382	0.109418
Inh-1	NDFIP1	-0.718459	7.55636	16.7635	0.00104063	0.109418
Ex-5	TRAF3IP2-AS1	0.63893	8.09412	10.817	0.0036304	0.109855
Ex-5	ARHGAP6	0.782277	6.26865	10.8043	0.00365329	0.109855
Ex-5	ID2	-1.25497	4.9476	10.7041	0.00366852	0.109855
Ex-5	HGSNAT	-1.06965	6.28732	10.7732	0.00369888	0.109855
Ex-5	KIAA1958	0.819918	7.0102	10.7629	0.00370405	0.109855
Ex-5	GABRA1	-0.636943	7.89643	10.7578	0.00370656	0.109855
Ex-1	AL590550.1	-0.820305	4.31036	17.9833	0.00113553	0.109992
Ex-1	AL139383.1	-1.11234	3.46416	17.9515	0.00114765	0.109992
Ex-1	OLFM3	0.597662	9.35487	17.9174	0.00114863	0.109992
Ex-1	DOCK10	1.94561	5.99449	17.9125	0.00115226	0.109992
Ex-1	IL1RAPL1	0.707901	10.9776	17.8762	0.00115863	0.109992
Ex-7	PNISR	0.721691	8.15052	7.9739	0.00905709	0.110017
Ex-5	CDH22	1.4871	4.43119	10.5538	0.00376065	0.110046
Ex-5	CEP290	0.71402	7.22414	10.7136	0.00376718	0.110046
Ex-5	ANKUB1	-1.27434	4.93373	10.6094	0.00378982	0.110046
Ex-5	RUNX1T1	0.592734	7.98494	10.6911	0.00379446	0.110046
Ex-5	CACNA1A	0.546842	9.22421	10.681	0.00380731	0.110046
Ex-5	NAP1L1	-0.680399	7.41024	10.6809	0.00380903	0.110046
Inh-4	LINC01197	-1.09336	6.61887	12.7234	0.00234257	0.110249
Inh-4	PLPPR1	0.852194	7.65645	12.7019	0.00235828	0.110249
Ex-1	ADAMTS9-AS2	1.64945	7.11065	17.8339	0.00116927	0.110267
Ex-1	EPHX2	-1.28269	1.55057	17.464	0.00117826	0.110267
Ex-1	NES	2.56219	1.20847	17.2102	0.00118264	0.110267
Inh-4	NAA30	-1.5292	5.05413	12.256	0.00238314	0.11052
Inh-4	AC004470.2	0.927378	7.26128	12.6403	0.00240384	0.110596
Inh-1	ZDHHC14	0.704611	7.19964	16.6855	0.00106051	0.11061
Ex-5	EML1	0.757414	6.98274	10.6562	0.00384561	0.110638
Ex-7	KCNIP2	0.732842	7.14639	7.94658	0.00915014	0.110658
Ex-7	CUL2	-1.106	5.61959	7.90171	0.00915863	0.110658
Ex-7	KCNB1	0.70906	7.52391	7.94638	0.00916052	0.110658
Ex-7	NAPB	-0.897672	6.78475	7.94315	0.00917294	0.110658
Inh-1	GABRB1	0.683277	9.30861	16.6472	0.00107033	0.11074
Ex-7	AC021134.1	1.00042	5.64141	7.87846	0.00920333	0.110835
Inh-1	IMMP2L	0.598635	9.04886	16.601	0.00108242	0.111102
Inh-1	RORA	0.724554	10.4096	16.5492	0.00109615	0.111146
Inh-1	NRXN1	0.823387	9.64315	16.4967	0.00111028	0.111146
Inh-1	CA3	1.16265	3.68654	16.451	0.00111708	0.111146
Inh-1	AL590807.1	-1.14618	3.80558	16.482	0.00112581	0.111146
Inh-1	NYAP2	0.881728	5.60086	16.4442	0.00112581	0.111146
Inh-6	ARL17B	2.09632	7.01136	18.6818	0.00061146	0.111218
Inh-6	ADGRL2	0.935436	9.72177	17.8915	0.000619287	0.111218
Inh-6	LINGO2	1.5005	9.60114	19.2544	0.000629993	0.111218
Ex-6	HIVEP3	0.87501	8.22689	14.2457	0.00154048	0.111327
Ex-6	CDH8	0.756159	7.98446	14.1989	0.00156143	0.111327
Ex-6	ALDH1A2	-1.24941	6.77137	14.1575	0.00158126	0.111327
Ex-6	RFLNA	-1.17183	5.40177	14.1695	0.00158618	0.111327
Ex-6	ANXA4	-1.02699	6.12348	14.1156	0.00160439	0.111456
Ex-2	SGTB	-0.742473	6.01722	22.2167	0.000390158	0.11156
Ex-7	SREBF2	0.802756	7.07856	7.90566	0.0093036	0.111795
Ex-7	MSTRG.5147	0.691763	7.66183	7.90698	0.00931495	0.111795
Ex-5	UBQLN2	-1.11152	5.37849	10.5973	0.00390242	0.111804
Ex-5	RPL37	-1.15023	6.25041	10.5952	0.00393797	0.111857
Ex-5	GMCL1	-1.117	6.46043	10.576	0.00396268	0.111857
Ex-5	KCND2	0.879784	8.53516	10.6559	0.00397482	0.111857
Ex-5	KSR1	0.923605	5.23751	10.5231	0.00398553	0.111857
Ex-5	DNMT3A	0.743987	6.54744	10.5564	0.00398607	0.111857
Ex-5	FUT9	0.668943	8.86361	10.5398	0.00400188	0.111857
Ex-4	AC080132.1	1.42221	4.27532	14.8622	0.00154288	0.111997
Ex-7	SHANK2	0.662694	7.76727	7.89658	0.00935648	0.112102
Ex-4	TENM3	0.662054	9.03256	14.8799	0.00155546	0.112141
Ex-2	NEGR1	0.703934	12.0292	22.0473	0.000403022	0.112189
Ex-2	DUSP6	-1.47893	3.2948	22.0756	0.000409052	0.112189
Ex-7	SETBP1	0.635628	9.28534	7.88638	0.00939084	0.112261
Ex-7	DGCR5	0.888	7.81607	7.88491	0.0094017	0.112261
Ex-5	ALDH1A2	-1.32764	6.06125	10.5236	0.0040361	0.112357
Ex-7	SUCLA2	-1.07549	5.75852	7.84362	0.00942827	0.112387
Ex-1	AHNAK2	-1.2541	3.41522	17.6585	0.00122088	0.112439
Ex-1	INHA	-1.67372	2.93983	17.6644	0.00122153	0.112439
Ex-1	MAF	1.40096	3.21608	17.3754	0.00122747	0.112439
Ex-2	TSHZ3	0.935306	6.09965	21.6304	0.00043742	0.112526
Ex-2	COL5A2	-1.37445	5.05157	21.606	0.000439963	0.112526
Ex-2	LRRIQ1	1.50259	4.84353	21.6106	0.000441619	0.112526
Ex-2	PDE2A	0.780066	5.89074	21.5225	0.00044685	0.112526
Ex-2	TRERF1	1.02756	6.00548	21.4629	0.000452145	0.112526
Ex-7	PPAT	-1.12836	4.84585	7.74871	0.00947179	0.112714
Inh-4	PPP2CB	-0.79508	6.838	12.5419	0.0024836	0.11272
Inh-4	NUTM2B-AS1	-0.804149	7.03387	12.5352	0.00248889	0.11272
Ex-4	DLG2	0.525055	12.3758	14.8214	0.00157968	0.11285
Ex-4	ATP10A	-2.05871	3.64611	14.7127	0.00159306	0.11285
Ex-4	BBOX1-AS1	1.90255	4.44616	15.5735	0.00160149	0.11285
Ex-4	UNC5C	0.522989	9.71361	14.6969	0.00163282	0.11285
Ex-4	DPH6-DT	1.70838	6.46648	17.2473	0.00164196	0.11285
Ex-4	FRMD4A	0.527799	11.2059	14.6657	0.00164641	0.11285
Ex-4	TENM4	0.564448	9.23164	14.6509	0.00165293	0.11285
Ex-4	ABR	0.778151	7.63346	14.6298	0.00166242	0.11285
Ex-4	CNTN1	0.565676	10.9251	14.6061	0.0016728	0.11285
Ex-4	SEMA4D	0.811764	5.97366	14.6028	0.00167628	0.11285
Ex-4	PDGFD	1.20336	4.1297	14.5389	0.00168242	0.11285
Ex-7	RANBP9	-0.764529	7.08061	7.843	0.00957511	0.112956
Ex-7	SLC25A36	-0.847638	6.5093	7.83711	0.00957657	0.112956
Ex-7	EIF2S1	-1.14522	4.76653	7.7128	0.00958175	0.112956
Ex-7	RAB3A	-1.11344	5.2405	7.76193	0.0095885	0.112956
Ex-7	RNGTT	-0.868979	6.87517	7.83622	0.00959891	0.112956
Ex-7	SLC35B3	-1.11198	4.86846	7.71942	0.00960589	0.112956
Ex-7	SLC26A4	-0.899898	7.38301	7.83479	0.00960857	0.112956
Ex-7	AL031681.3	1.24857	4.57331	7.74551	0.00962082	0.112956
Inh-1	ST6GALNAC5	0.688239	8.59141	16.3406	0.00115356	0.113023
Inh-4	BACH1	-0.911554	7.16985	12.5007	0.00251523	0.113029
Ex-2	PBX3	1.09654	4.30914	21.2603	0.000473795	0.113083
Ex-2	VWC2L	1.05049	5.47652	21.189	0.000477801	0.113083
Ex-2	ARHGAP33	1.04534	3.70112	21.0153	0.000494748	0.113083
Ex-2	CSMD1	0.6138	12.0916	20.7548	0.000520525	0.113083
Ex-2	RNF217-AS1	-0.837305	5.34979	20.7582	0.00052055	0.113083
Ex-2	GLIS1	0.919985	5.87609	20.7157	0.000524994	0.113083
Ex-2	NCAM2	0.779695	10.4907	20.6535	0.000531299	0.113083
Ex-2	IL7	-1.6416	3.97517	20.6728	0.000535369	0.113083
Ex-2	NFKBID	1.35414	2.18805	19.7591	0.000538687	0.113083
Ex-2	GABRG3	0.527998	9.01068	20.5726	0.000540097	0.113083
Ex-2	TRPC4	1.3402	5.15046	20.5271	0.000546947	0.113083
Ex-7	RPL30	-1.28414	4.81474	7.69082	0.00967678	0.113424
Ex-3	CAMK4	0.711284	8.24992	23.5912	0.000330356	0.113701
Ex-3	GLIS1	0.772384	5.9368	23.4349	0.000340307	0.113701
Ex-3	SGO1-AS1	-0.812299	5.34511	23.2837	0.000349784	0.113701
Ex-3	LINC02853	1.52112	4.40254	22.987	0.000366527	0.113701
Ex-3	MSTRG.1942	-1.06396	5.13686	22.928	0.000373595	0.113701
Ex-3	MSRA	0.755906	9.45366	22.7199	0.000387758	0.113701
Ex-3	KCNH4	1.1682	3.85711	22.5152	0.000393408	0.113701
Ex-3	LINC02253	-1.22677	3.34674	22.6465	0.00039835	0.113701
Ex-3	RUNX1T1	0.742462	7.59548	22.4125	0.000410753	0.113701
Ex-3	CCDC178	1.69618	4.37296	22.2872	0.000414344	0.113701
Ex-3	SSBP2	0.634331	8.48905	22.2166	0.000426181	0.113701
Ex-3	PTPRD	0.54046	13.0094	22.2053	0.000427079	0.113701
Ex-3	CSMD1	0.569268	12.625	22.1848	0.000428738	0.113701
Ex-7	PDZRN3	0.660898	9.04465	7.80377	0.00972428	0.11379
Ex-4	EFNA5	0.501267	10.5413	14.5296	0.00170739	0.113804
Ex-6	SSBP2	0.824151	7.89303	13.9789	0.00166361	0.113952
Ex-6	MSH4	1.23917	5.30208	13.8306	0.00168005	0.113952
Ex-6	AC007262.2	1.02735	5.7622	13.8964	0.00169053	0.113952
Ex-3	DPF3	1.05409	5.95058	21.8814	0.00045494	0.114206
Ex-3	KANSL1	1.15811	8.52082	22.2802	0.000466303	0.114206
Ex-3	ZFHX2	1.20943	5.56782	21.7091	0.000471276	0.114206
Ex-3	ASTN2	-0.591196	7.19024	21.6816	0.000471966	0.114206
Ex-3	ROBO3	1.25542	3.22746	21.1416	0.000473707	0.114206
Ex-6	GLRA3	1.66363	5.13689	13.6531	0.0017152	0.114481
Ex-5	UBOX5	1.0554	4.52851	10.3228	0.00415403	0.114483
Ex-5	TSPOAP1	0.882803	5.34333	10.4028	0.00417285	0.114483
Ex-5	NDUFA10	-0.731475	6.75321	10.4256	0.00417384	0.114483
Ex-5	CACNA1C	0.521311	9.39218	10.408	0.00419328	0.114483
Ex-5	TAFA2	0.813269	8.65812	10.4065	0.00419572	0.114483
Ex-7	SUB1	-0.874977	6.11255	7.76888	0.00981136	0.114618
Ex-4	MICAL3	0.678726	8.38701	14.4581	0.00174052	0.11463
Ex-4	AL109930.1	-1.41143	2.99285	14.2171	0.00174896	0.11463
Ex-4	ATP6V1B2	-0.816384	5.98994	14.4143	0.00176195	0.11463
Ex-4	CRTC1	1.03348	6.55823	14.412	0.00176304	0.11463
Inh-6	KCNIP4	1.23841	11.5106	17.5277	0.000678263	0.114779
Inh-6	EPHA6	0.739412	10.038	17.3305	0.000712925	0.114779
Inh-6	KCTD16	0.898607	10.2306	17.251	0.000727437	0.114779
Inh-6	TRMT9B	-0.895817	8.55679	17.0972	0.000756638	0.114779
Inh-6	B3GAT1	1.41693	5.84864	16.8821	0.000775195	0.114779
Inh-1	LINC01250	0.846807	6.67284	16.245	0.00118122	0.114828
Inh-1	FAM222B	0.9521	7.31996	16.2135	0.0011903	0.114828
Inh-1	IL1RAPL1	0.597791	12.0468	16.1242	0.00121673	0.114828
Inh-1	SLC35F1	0.491223	9.17188	16.1171	0.00121887	0.114828
Inh-1	MGC4859	1.34339	2.62695	15.7208	0.00123242	0.114828
Inh-1	AC010422.6	1.35478	1.96704	15.3337	0.00123824	0.114828
Inh-1	TAFA4	0.713583	6.2925	16.0517	0.00123918	0.114828
Inh-1	AL163952.1	1.2517	3.6645	15.9042	0.00127542	0.114828
Inh-1	ADCY9	0.813132	7.06359	15.9316	0.00127649	0.114828
Inh-1	ROBO1	0.697248	9.92279	15.9145	0.00128178	0.114828
Inh-1	AC118942.1	-1.582	2.99754	15.7162	0.00128342	0.114828
Inh-1	NRG2	0.534962	7.20118	15.8632	0.00129842	0.114828
Inh-1	SEM1	1.02656	6.39436	15.7387	0.0013398	0.114828
Inh-1	BTBD9	0.504722	8.28493	15.7311	0.00134197	0.114828
Inh-1	CCDC144CP	0.947424	6.08584	15.73	0.00134296	0.114828
Inh-1	KCNMB2-AS1	-0.871518	6.96796	15.703	0.00135162	0.114828
Inh-1	ARHGAP24	1.00991	4.53865	15.7093	0.00135593	0.114828
Inh-1	EDIL3	0.636596	8.27982	15.6767	0.00136045	0.114828
Inh-1	DEAF1	1.23556	5.92104	15.6561	0.00136858	0.114828
Inh-1	LDB2	0.596102	8.88629	15.6527	0.00136867	0.114828
Inh-1	CROCCP3	1.12605	5.7696	15.6429	0.00137335	0.114828
Inh-1	RBFOX3	1.0647	7.22146	15.7102	0.00137538	0.114828
Inh-1	HDAC10	1.33776	3.1695	15.4898	0.0013762	0.114828
Ex-5	RUNX2	1.05384	5.75265	10.3745	0.0042331	0.115047
Ex-7	LINC00632	0.674665	9.22355	7.76925	0.00986663	0.115072
Ex-6	AC114689.3	-1.40134	5.13537	13.8405	0.00174138	0.1151
Ex-7	RPL14	-1.32676	5.17912	7.67794	0.00989052	0.11516
Ex-1	DGCR5	0.783727	7.47971	17.4606	0.00126546	0.115245
Ex-5	CDH9	-0.916863	5.87181	10.3682	0.00426809	0.115247
Ex-5	SH3RF3	0.671855	7.92576	10.355	0.00427399	0.115247
Ex-1	AC093865.1	1.92347	5.83999	17.4426	0.00127364	0.115319
Ex-7	SLC44A2	1.0312	5.60329	7.69925	0.00992468	0.115338
Ex-7	AC109441.1	-1.21079	4.65163	7.61764	0.00993869	0.115338
Ex-1	NLGN1	0.602683	10.4628	17.3712	0.0012898	0.115626
Ex-1	PRSS55	-2.08173	2.30354	17.3819	0.00129479	0.115626
Ex-1	AC018730.1	-0.919771	5.08362	17.3365	0.00130022	0.115626
Ex-1	PUS10	0.891753	4.89714	17.2727	0.00132194	0.115626
Ex-1	NRXN1	0.657585	11.9445	17.2333	0.00132859	0.115626
Ex-1	GCFC2	0.636744	5.69078	17.2341	0.00132925	0.115626
Ex-1	ANKRD29	-1.09717	4.24344	17.2159	0.00133651	0.115626
Ex-1	AL807742.1	-1.43275	5.3643	17.1983	0.00133914	0.115626
Ex-1	SH3D19	-0.691496	6.87399	17.182	0.00134346	0.115626
Ex-7	PDZD2	0.973786	9.32443	7.9555	0.00998176	0.115647
Ex-5	NKAPP1	1.38306	5.24828	10.2652	0.00433832	0.115809
Ex-5	MAP2K6	0.932795	5.19875	10.2767	0.00434938	0.115809
Ex-5	AC139887.2	0.928342	5.42296	10.2728	0.00437556	0.115809
Ex-5	SH3D19	-0.656211	7.02655	10.2866	0.00438255	0.115809
Ex-5	LMF1	-1.0824	6.12242	10.2853	0.0043961	0.115809
Ex-5	NLGN1	0.477229	11.1092	10.2612	0.00441838	0.115809
Ex-5	ANTXR1	0.674506	7.22101	10.2628	0.00441958	0.115809
Ex-5	CELF4	0.569351	8.67378	10.2544	0.00442957	0.115809
Inh-2	SLC35F4	1.03995	7.48478	39.5337	2.1366e-05	0.115814
Inh-2	FAM27C	-1.42652	6.78614	37.0687	2.98253e-05	0.115814
Inh-2	NNMT	-2.05458	4.94321	35.19	3.93262e-05	0.115814
Inh-2	VCAN	-1.16931	6.14082	34.8512	4.08804e-05	0.115814
Ex-8	AC083870.1	-2.06413	5.39156	18.6908	0.000334723	0.115823
Ex-8	PTPRS	0.977246	6.81677	19.2358	0.000344815	0.115823
Ex-1	AC112770.1	-2.41893	2.09195	17.1545	0.00135546	0.116021
Ex-3	NLGN1	0.544963	10.9117	21.4658	0.000491972	0.116492
Ex-4	GALNT9	0.738781	5.56259	14.3309	0.001805	0.116642
Inh-4	BBS9	0.622598	8.06064	12.3631	0.00261702	0.116699
Ex-4	CCN4	1.67049	3.65221	14.0877	0.00181813	0.116779
Ex-2	LRRC37A3	1.37461	6.79348	20.4412	0.000603466	0.116787
Ex-2	ALDH5A1	-0.854494	4.83756	19.9701	0.000612019	0.116787
Ex-2	IQCJ-SCHIP1	0.693899	11.166	19.9504	0.000613587	0.116787
Ex-2	AC005697.1	-2.03816	4.45261	20.242	0.000621772	0.116787
Ex-2	MIR29B2CHG	0.882914	7.06519	19.8529	0.000626196	0.116787
Ex-2	MSTRG.5008	0.930126	5.59657	19.7801	0.000636266	0.116787
Ex-2	DNAJB1	1.15595	4.23344	19.7378	0.00064559	0.116787
Ex-2	MSTRG.1784	0.845766	8.4057	19.6691	0.000650575	0.116787
Ex-2	LINC01580	-1.42163	3.88697	19.7173	0.000651364	0.116787
Ex-2	SEM1	0.945397	6.2374	19.5595	0.000665902	0.116787
Ex-2	AC107223.1	-0.807191	7.45096	19.4092	0.000687073	0.116787
Ex-2	HIVEP3	0.765625	8.59354	19.3496	0.000695745	0.116787
Ex-2	PTCSC2	-2.10125	2.74615	19.0246	0.000697514	0.116787
Ex-2	LINC00971	1.51605	1.73764	18.0972	0.000718929	0.116787
Ex-2	PHACTR1	0.587563	11.3745	19.1704	0.000722648	0.116787
Ex-2	DPP10-AS3	-1.42556	3.04549	19.2212	0.000725012	0.116787
Ex-2	LINC01937	-1.73079	3.64498	19.2281	0.000725402	0.116787
Ex-2	AC103810.1	3.74335	3.16211	19.2718	0.000728104	0.116787
Ex-2	SOD2	-0.800029	6.29507	19.1239	0.000729974	0.116787
Ex-5	LINC02726	1.22185	5.32365	10.1879	0.00448405	0.116789
Inh-1	SGCZ	0.630283	11.0289	15.5306	0.00141143	0.117013
Ex-7	ZNF493	1.09427	4.71931	7.61609	0.0101451	0.117064
Ex-7	GORASP2	-1.33996	4.53571	7.55912	0.0101526	0.117064
Ex-7	CD63	-1.33289	4.62552	7.56404	0.0101541	0.117064
Inh-4	MT-ND4L	1.06441	8.69083	12.9798	0.0026465	0.117113
Inh-1	TACC3	1.40115	2.94999	15.2198	0.001442	0.117404
Inh-1	NSD1	0.760602	7.09665	15.4349	0.00144621	0.117404
Inh-1	HUNK	0.67731	6.65907	15.4219	0.00145112	0.117404
Inh-1	SKI	0.843323	6.08555	15.2874	0.00150198	0.117404
Inh-1	AJAP1	0.660684	6.22954	15.2695	0.00150869	0.117404
Inh-1	SHANK2	0.619533	7.87898	15.2543	0.00151415	0.117404
Inh-1	STX8	0.670202	6.33197	15.2497	0.00151629	0.117404
Inh-1	ADAMTS20	-1.69754	3.64494	15.2257	0.00151938	0.117404
Inh-1	KIAA1217	0.551135	11.3672	15.1975	0.00153622	0.117404
Inh-1	DDX3P1	-1.54687	3.4443	15.1789	0.00153828	0.117404
Inh-1	KIF26B	0.501712	8.41253	15.1648	0.00154916	0.117404
Inh-1	HPYR1	1.22169	3.59514	15.0857	0.00156639	0.117404
Inh-1	SYCP2L	-1.17806	4.61459	15.1393	0.00156691	0.117404
Inh-1	CACNA1G	0.929237	4.09449	15.1139	0.00157658	0.117404
Inh-1	LRFN2	0.922501	5.39316	15.1014	0.00157681	0.117404
Inh-1	TAFA2	0.557492	10.9588	15.0707	0.00158699	0.117404
Inh-1	EAF2	-0.731471	5.39855	15.0686	0.00158928	0.117404
Inh-1	PTCHD4	0.608467	8.77297	15.0199	0.0016079	0.117404
Inh-1	ZNF251	0.698339	5.72659	15.0177	0.00160984	0.117404
Inh-1	FHIT	0.665108	9.57321	15.0051	0.00161404	0.117404
Inh-1	LRRTM4	0.462486	11.9735	14.9815	0.00162388	0.117404
Inh-1	AC107223.1	-0.8548	7.09509	14.9737	0.00162733	0.117404
Inh-1	YJEFN3	1.13922	3.63167	14.9383	0.00163255	0.117404
Inh-1	CLCA4-AS1	-1.4739	3.74166	14.9198	0.00165916	0.117404
Inh-1	GRIN1	0.677127	7.73073	14.868	0.00167231	0.117404
Inh-1	ARL17B	3.02211	7.28983	20.7161	0.00167574	0.117404
Inh-1	DDX51	0.924634	3.97785	14.8448	0.00168874	0.117404
Inh-1	CXCL13	1.17859	2.94772	14.6619	0.00168921	0.117404
Inh-1	UNC5C	0.571893	9.15568	14.824	0.00169143	0.117404
Inh-1	GALNTL6	0.605828	10.466	14.8161	0.00169488	0.117404
Inh-1	UTP23	0.776971	6.13846	14.8114	0.00169756	0.117404
Ex-6	RRAS2	-1.08567	5.67139	13.7323	0.00179728	0.117653
Ex-3	IMMP2L	0.508409	9.33624	21.2763	0.0005104	0.117666
Ex-3	PPP2CB	-0.88475	5.91342	21.2235	0.000515904	0.117666
Ex-3	MARCHF1	0.581519	10.0717	21.1459	0.000523549	0.117666
Ex-5	ADD3	0.772067	6.54754	10.1908	0.00453985	0.117676
Ex-5	FAM27C	-0.96343	7.44005	10.1727	0.00456312	0.117676
Ex-5	MSC-AS1	0.657724	7.90342	10.1681	0.00456946	0.117676
Ex-7	PPARD	1.08333	5.55844	7.61883	0.0102552	0.11796
Ex-7	RRP1B	1.09645	4.62149	7.58617	0.0102803	0.11796
Ex-7	CELSR3	1.22862	4.28398	7.59806	0.0102849	0.11796
Ex-7	AC091885.2	-1.28221	4.84421	7.55224	0.010299	0.11796
Inh-4	KIAA1217	0.560441	11.5102	12.2676	0.00269508	0.118032
Inh-4	UBE3A	-0.808627	7.84397	12.2561	0.002708	0.118032
Ex-6	MAGI2	0.541767	11.3582	13.6669	0.00182047	0.118036
Ex-5	ARMC9	0.700391	7.04529	10.143	0.00461481	0.118401
Ex-4	PPP4R4	0.546203	7.28344	14.2204	0.0018559	0.118487
Ex-7	INTS11	1.03696	4.68388	7.56383	0.0103717	0.118488
Ex-7	ZFHX2-AS1	1.03621	5.95846	7.61276	0.0103788	0.118488
Ex-4	C9orf147	0.843116	4.96535	14.2116	0.00186751	0.118514
Ex-7	KIF3A	-0.734384	7.3082	7.64415	0.0104158	0.118663
Ex-7	ZBTB4	0.914619	6.19398	7.61451	0.010428	0.118663
Ex-7	LNPEP	-0.706808	7.30588	7.63635	0.0104504	0.118725
Ex-1	AC117383.1	-1.1017	3.44176	17.0311	0.00139644	0.11888
Inh-5	PCDH9	0.856456	11.0924	15.221	0.00123305	0.118898
Ex-7	DYNLT3	-1.19682	4.98189	7.52519	0.0104871	0.11895
Ex-3	FRG1-DT	1.19509	5.22293	20.9694	0.000545202	0.11901
Ex-3	SLC8A1	0.676615	9.85593	20.827	0.000557387	0.11901
Ex-3	MSTRG.2104	-0.647763	5.87947	20.7403	0.000567282	0.11901
Ex-3	PPFIA4	0.803988	6.24875	20.6264	0.000580343	0.11901
Ex-3	AFF2	1.21297	5.1965	20.6328	0.00058266	0.11901
Ex-3	CADM1	0.685676	9.367	20.5969	0.00058338	0.11901
Ex-7	PELI1	-0.823471	6.92159	7.61916	0.010524	0.119076
Ex-7	STAT4	-0.969463	6.08158	7.60036	0.0105322	0.119076
Inh-4	BEX4	-1.01579	6.0654	12.1652	0.00275454	0.119165
Inh-4	RLIM	-1.20353	5.3917	11.9826	0.00277739	0.119263
Ex-7	ARID3A	1.00234	5.01921	7.51841	0.0106036	0.119691
Ex-7	MSTRG.2585	0.729784	7.20026	7.58993	0.010642	0.119749
Ex-7	GAS8	1.16607	4.90912	7.50291	0.0106659	0.119749
Ex-7	TSC22D1	-0.698576	8.49468	7.58402	0.0106748	0.119749
Ex-7	ADAM23	-0.729508	9.73527	7.58301	0.010677	0.119749
Ex-7	BEX4	-1.14259	5.5105	7.52719	0.0107067	0.119892
Ex-7	EML1	-1.12561	4.90091	7.46539	0.0107442	0.120119
Inh-4	MIR137HG	1.2229	7.46817	12.8972	0.00281887	0.120154
Ex-6	EDIL3	0.818522	8.99185	13.5692	0.00187346	0.120326
Inh-4	ADCY9	0.782229	6.66455	12.0789	0.00286384	0.120511
Inh-4	LRRC37A3	0.912401	7.1304	12.07	0.00286882	0.120511
Ex-5	R3HDM2	0.784337	8.30479	10.0766	0.00472181	0.120696
Ex-4	LINC02853	1.49888	4.5956	14.1245	0.00191508	0.12081
Ex-1	AL669970.1	-1.3696	1.62226	16.6297	0.00143378	0.120835
Ex-1	DCX	-1.26656	5.25316	16.8695	0.00143827	0.120835
Ex-1	FBXO34	0.71475	7.76582	16.8542	0.00144256	0.120835
Ex-4	SHROOM3	-0.852773	4.38605	14.1057	0.00192798	0.120904
Ex-7	TMEM64	0.846705	6.38531	7.53065	0.0108436	0.121039
Ex-4	AC079760.1	-0.749173	5.6848	14.056	0.00194202	0.121068
Ex-4	TOX3	1.47953	4.30195	13.9582	0.00196933	0.121087
Ex-4	AP001977.1	1.99369	5.47328	16.5144	0.00200368	0.121087
Ex-4	OPRD1	1.08635	5.53619	13.9439	0.00200662	0.121087
Ex-4	AL096794.1	-0.8492	5.63353	13.9256	0.00201264	0.121087
Ex-4	AC069133.1	1.39576	4.20502	13.8653	0.0020162	0.121087
Ex-4	LINC00159	1.13165	4.90524	13.9026	0.0020303	0.121087
Ex-4	ALOX12P2	-1.02823	4.92995	13.898	0.0020327	0.121087
Ex-4	TTYH1	1.15126	4.13963	13.8494	0.00203372	0.121087
Ex-7	TRUB1	-1.15413	5.03669	7.45168	0.0108678	0.121116
Ex-1	MSTRG.3970	-1.13991	4.9712	16.8131	0.00145643	0.121348
Inh-5	ANKRD55	-1.32628	6.9123	15.0494	0.00129512	0.121449
Inh-5	AC073050.1	0.897468	9.33812	15.0256	0.0013008	0.121449
Ex-1	ERICH6	-1.18086	2.01213	16.6553	0.00146645	0.121537
Ex-4	MLLT6	0.773026	4.79245	13.8561	0.00205739	0.121549
Ex-4	SUMO3	-1.04346	4.24566	13.8617	0.00206444	0.121549
Ex-1	STK31	-1.24191	2.26135	16.6961	0.00147742	0.121624
Ex-1	RFC3	-1.67035	5.17072	16.6983	0.00149329	0.121624
Ex-1	CELF2	0.792506	11.2635	16.6959	0.0014934	0.121624
Ex-1	LINC02054	1.42416	3.69189	16.6084	0.00150041	0.121624
Ex-1	UNC5B	1.06758	3.79104	16.6517	0.00150633	0.121624
Ex-5	MMP16	0.559501	9.66144	10.0378	0.00478782	0.121688
Ex-5	GOLPH3	-0.875492	5.69939	10.034	0.00480655	0.121688
Ex-5	SEM1	0.831715	6.33065	10.0278	0.00481373	0.121688
Ex-4	EDIL3	0.923227	6.37728	13.8068	0.00207878	0.121718
Inh-6	CADM1	0.731817	9.29786	16.6483	0.000849126	0.121797
Ex-7	KCND3	0.747692	7.89957	7.52488	0.0109523	0.121864
Inh-5	KCND2	1.01181	8.85209	14.9489	0.00132863	0.12211
Ex-7	PPM1E	0.665765	8.89493	7.51242	0.0110057	0.122265
Ex-7	NTNG2	0.75765	8.1268	7.50654	0.0110381	0.122431
Ex-6	MMP16	0.569281	10.4102	13.4759	0.00192537	0.122431
Ex-6	PPP3CA	0.742843	10.6228	13.4414	0.001945	0.122431
Ex-6	KCNJ3	0.613574	9.15511	13.3934	0.00197283	0.122431
Ex-6	AL391117.1	-1.51889	6.7668	14.2075	0.00197818	0.122431
Ex-4	PDE2A	0.656286	5.8674	13.7671	0.00210284	0.12245
Inh-5	GRM4	1.13043	5.75534	14.7574	0.00139034	0.122822
Inh-5	SOX2-OT	0.653511	10.9333	14.763	0.00139823	0.122822
Inh-5	MYT1L	0.667821	9.43721	14.7211	0.00141468	0.122822
Inh-5	SPTBN4	0.708205	8.00324	14.7097	0.00141991	0.122822
Ex-1	PDGFD	1.35553	4.70833	16.6058	0.00153187	0.122869
Ex-1	MLLT3	0.61852	8.6399	16.5503	0.0015421	0.122869
Ex-1	IKZF2	1.27867	4.70083	16.547	0.00155155	0.122869
[truncated: 180,100 more rows]
